# Supplementary material for: Microwave Dielectric Response of Bovine Milk as Pregnancy Detection Tool in Dairy Cows
Source: MDPI journal article supplement (doi:10.3390/s24092742), 2024-04-25
Supplement: s1 [file s1]

**SUPPORTING INFORMATION 1: Physiological and Microwave Dielectric fitting parameters measured weekly for individual tracked cows among three different reproductive states: Non-Pregnant, Insemination, and Pregnancy.**

**Table S1A:** Physiological parameters (Somatic cell count -SCC, Fat %, protein%, lactose% and Milk Fat Globule Average diameter) measured weekly for n=12 different cows at different reproductive states (Non-pregnant-NP, during inseminations and during confirmed pregnancy). The not measured days correspond mostly to Saturdays, an official holiday in Israel.

**n = 1**

| <b>week</b> | <b>DATE</b> | <b>cow number</b> | <b>DIM (days in milk)</b> | <b>STATE</b>   | <b>SCC (10<sup>3</sup>/mL)</b> | <b>Fat %</b> | <b>protein %</b> | <b>lactose %</b> | <b>MFG Average diameter</b> |
|-------------|-------------|-------------------|---------------------------|----------------|--------------------------------|--------------|------------------|------------------|-----------------------------|
| 1           | 13.5.20     | 4027              | 55                        | NON-PREGNANT   | 44                             | 3.05         | 3.52             | 4.71             | 3.3                         |
| 2           | 20.5.20     | 4027              | 62                        | NON-PREGNANT   | 44                             | 2.67         | 3.19             | 4.78             | 3.7                         |
| 3           | 27.5.20     | 4027              | 69                        | NON-PREGNANT   | 31                             | 2.8          | 3.36             | 4.8              | 3.57                        |
| 4           | 3.6.20      | 4027              | 76                        | NON-PREGNANT   | 31                             | 2.57         | 3.08             | 4.82             | 3.7                         |
| 5           | 10.6.20     | 4027              | 83                        | NON-PREGNANT   | 31                             | 2.78         | 3.17             | 4.85             | 3.37                        |
| 6           | 17.6.20     | 4027              | 90                        | NON-PREGNANT   | 15                             | 3.1          | 3.49             | 4.83             | 3.15                        |
| 7           | 24.6.20     | 4027              | 97                        | INSEMINATION 1 | 22                             | 3.26         | 3.42             | 4.94             | 3.15                        |
| 8           | 1.7.20      | 4027              | 104                       | INSEMINATION 1 | 22                             | 3.68         | 3.48             | 4.96             | 3.56                        |
| 9           |             |                   |                           | INSEMINATION 1 |                                |              |                  |                  |                             |
| 10          | 15.7.20     | 4027              | 118                       | INSEMINATION 2 | 18                             | 3.74         | 3.29             | 5.02             | 3.51                        |
| 11          | 21.7.20     | 4027              | 124                       | INSEMINATION 2 | 18                             | 3.43         | 3.5              | 5                | 3.51                        |
| 12          | 27.7.20     | 4027              | 130                       | INSEMINATION 2 | 18                             | 3.49         | 3.27             | 5.05             | 4.18                        |
| 13          | 05.08.20    | 4027              | 139                       | INSEMINATION 3 | 18                             | 3.72         | 3.64             | 4.99             | 3.6                         |
| 14          | 12.08.20    | 4027              | 146                       | INSEMINATION 3 | 19                             | 3.65         | 3.44             | 5                | NO                          |
| 15          | 19.08.20    | 4027              | 153                       | INSEMINATION 3 | 19                             | 3.7          | 3.49             | 5                | 3.39                        |

|    |            |      |     |                |    |      |      |      |      |
|----|------------|------|-----|----------------|----|------|------|------|------|
| 16 | 26.08.20   | 4027 | 160 | INSEMINATION 4 | 19 | 3.69 | 3.34 | 4.93 | 3.53 |
| 17 | 02.09.20   | 4027 | 167 | INSEMINATION 4 | 19 | 3.68 | 3.35 | 4.95 | 2.92 |
| 18 | 09.09.20   | 4027 | 174 | INSEMINATION 4 | 19 | 3.98 | 3.34 | 5    | 3.38 |
| 19 | 16.09.20   | 4027 | 181 | INSEMINATION 5 | 58 | 3.64 | 3.26 | 4.93 | 3.3  |
| 20 |            |      |     | INSEMINATION 5 |    |      |      |      |      |
| 21 | 1.10.20    | 4027 | 196 | INSEMINATION 6 | 58 | 3.99 | 3.3  | 4.99 | 3.8  |
| 22 | 7.10.20    | 4027 | 202 | INSEMINATION 6 | 58 | 3.76 | 3.42 | 4.92 | 3.5  |
| 23 | 14.10.20   | 4027 | 209 | INSEMINATION 6 | 58 | 4.06 | 3.32 | 5.04 | 4.07 |
| 24 | 22.10.20   | 4027 | 217 | INSEMINATION 6 | 38 | 4.08 | 3.28 | 5.03 | 3.6  |
| 25 | 28.10.20   | 4027 | 223 | INSEMINATION 6 | 38 | 3.87 | 3.24 | 4.98 | 3.3  |
| 26 | 04.11.20   | 4027 | 230 | INSEMINATION 6 | 38 | 4.08 | 3.28 | 4.92 | 3.4  |
| 27 | 11.11.2020 | 4027 | 237 | INSEMINATION 7 | 47 | 4.04 | 3.23 | 5.07 | 3.49 |
| 28 | 26.11.2020 | 4027 | 252 | INSEMINATION 7 | 47 | 4.14 | 3.57 | 4.94 | 3.16 |
| 29 | 3.12.2020  | 4027 | 259 | INSEMINATION 7 | 47 | 3.5  | 3.71 | 4.62 | 3.3  |
| 30 | 09.12.2020 | 4027 | 265 | INSEMINATION 7 | 47 | 3.94 | 3.26 | 5.09 | 4.03 |
| 31 | 16.12.2020 | 4027 | 272 | INSEMINATION 7 | 25 | 3.56 | 3.56 | 5.01 | 3.47 |
| 32 | 23.12.2020 | 4027 | 279 | INSEMINATION 8 | 25 | 3.99 | 3.26 | 5.09 | 3.9  |
| 33 | 30.12.2020 | 4027 | 286 | INSEMINATION 8 | 25 | 4.08 | 3.36 | 4.99 | 3.2  |
| 34 | 06.1.2021  | 4027 | 293 | INSEMINATION 8 | 25 | 4.58 | 3.37 | 5.04 | 3.68 |
| 35 | 13.1.2021  | 4027 | 300 | INSEMINATION 8 | 48 | 3.6  | 3.43 | 4.94 | 3.3  |
| 36 | 27.1.2021  | 4027 | 314 | INSEMINATION 8 | 48 | 4.29 | 3.33 | 5.14 | 3.87 |
| 37 | 04.02.2021 | 4027 | 322 | INSEMINATION 8 | 48 | 4.28 | 3.34 | 5.11 | 3.43 |
| 38 | 11.02.2021 | 4027 | 329 | INSEMINATION 8 | 48 | 4.11 | 3.35 | 5.09 | 3.6  |
| 39 | 17.02.2021 | 4027 | 335 | INSEMINATION 8 | 30 | 3.91 | 3.36 | 5.12 | 3.7  |
| 40 | 23.02.2021 | 4027 | 341 | INSEMINATION 9 | 30 | 4.77 | 3.51 | 5.1  | 4    |
| 41 | 04.03.2021 | 4027 | 350 | INSEMINATION 9 | 30 | 4.58 | 3.39 | 5.13 | 3.9  |
| 42 | 11.03.2021 | 4027 |     | INSEMINATION 9 |    |      |      |      |      |
| 43 | 18.03.2021 | 4027 | 364 | INSEMINATION 9 | 47 | 3.91 | 3.25 | 4.82 | 3.7  |

|    |            |      |     |                 |    |      |      |      |      |
|----|------------|------|-----|-----------------|----|------|------|------|------|
| 44 | 25.03.2021 | 4027 | 371 | INSEMINATION 10 | 47 | 4.39 | 3.59 | 5.07 | 3.75 |
| 45 | 05.04.2021 | 4027 | 382 | INSEMINATION 10 | 47 | 4.67 | 3.61 | 4.6  | 4.7  |
| 46 | 12.04.2021 | 4027 | 389 | INSEMINATION 10 | 37 | 5.03 | 3.41 | 5.17 | 2.8  |
| 47 | 19.04.2021 | 4027 | 396 | INSEMINATION 10 | 37 | 4.15 | 3.65 | 4.88 | 3.37 |
| 48 | 26.04.2021 | 4027 | 403 | INSEMINATION 11 | 37 | 4.06 | 3.55 | 5.09 | 4    |
| 49 | 05.05.2021 | 4027 | 412 | INSEMINATION 11 | 37 | 3.81 | 3.49 | 4.86 | 3.28 |
| 50 | 19.05.2021 | 4027 |     | INSEMINATION 11 |    |      |      |      |      |
| 51 | 26.05.2021 | 4027 | 426 | INSEMINATION 12 | 49 | 3.93 | 3.71 | 4.87 | 3.41 |

n=2

| week | DATE     | cow number | DIM (days in milk) | state          | SCC (10 <sup>3</sup> /mL) | % Fat | Protein % | Lactose % | MFG Average diameter |
|------|----------|------------|--------------------|----------------|---------------------------|-------|-----------|-----------|----------------------|
| 1    | 13.5.20  | 4032       | 43                 | NON-PREGNANT   | 35                        | 3.05  | 3.29      | 5.03      | 3.65                 |
| 2    | 20.5.20  | 4032       | 50                 | NON-PREGNANT   | 35                        | 2.25  | 3.09      | 5.05      | 4.2                  |
| 3    | 27.5.20  | 4032       | 57                 | NON-PREGNANT   | 60                        | 3.23  | 2.89      | 5.12      | 3.94                 |
| 4    | 3.6.20   | 4032       | 64                 | NON-PREGNANT   | 60                        | 2.8   | 3.05      | 5.03      | 4.5                  |
| 5    | 10.6.20  | 4032       | 71                 | NON-PREGNANT   | 60                        | 2.79  | 3.06      | 5.11      | 4.07                 |
| 6    | 17.6.20  | 4032       | 78                 | NON-PREGNANT   | 49                        | 2.64  | 2.92      | 5.09      | 4                    |
| 7    | 24.6.20  | 4032       | 85                 | INSEMINATION 1 | 49                        | 3.07  | 3.1       | 5.15      | 4.8                  |
| 8    | 1.7.20   | 4032       | 92                 | INSEMINATION 1 | 49                        | 3.49  | 3.14      | 5.21      | 3.94                 |
| 9    |          |            |                    | INSEMINATION 1 |                           |       |           |           |                      |
| 10   | 15.7.20  | 4032       | 106                | INSEMINATION 1 | 37                        | 3.74  | 3.04      | 5.22      | 4.23                 |
| 11   | 21.7.20  | 4032       | 112                | INSEMINATION 1 | 37                        | 3.47  | 3.37      | 5.13      | 4.49                 |
| 12   | 27.7.20  | 4032       | 118                | INSEMINATION 1 | 37                        | 3.31  | 3.27      | 5.17      | 4.76                 |
| 13   | 05.08.20 | 4032       | 127                | INSEMINATION 1 | 37                        | 3.46  | 3.57      | 5.1       | 3.95                 |
| 14   | 12.08.20 | 4032       | 134                | INSEMINATION 1 | 53                        | 3.27  | 3.28      | 5.15      | 4.49                 |

|    |            |      |     |                |     |      |      |      |      |
|----|------------|------|-----|----------------|-----|------|------|------|------|
| 15 | 19.08.20   | 4032 | 141 | INSEMINATION 1 | 53  | 2.92 | 3.14 | 5.02 | 4.1  |
| 16 | 26.08.20   | 4032 | 148 | INSEMINATION 2 | 53  | 3.66 | 3.13 | 5.19 | 3.8  |
| 17 | 02.09.20   | 4032 | 155 | INSEMINATION 2 | 53  | 3.59 | 3.31 | 5.14 | 3.52 |
| 18 | 09.09.20   | 4032 | 162 | INSEMINATION 2 | 53  | 3.62 | 3.19 | 5.1  | 4.8  |
| 19 | 16.09.20   | 4032 | 169 | INSEMINATION 2 | 124 | 3.65 | 3.01 | 5.2  | 3.75 |
| 20 |            |      |     | INSEMINATION 2 |     |      |      |      |      |
| 21 | 1.10.20    | 4032 | 184 | INSEMINATION 2 | 124 | 3.51 | 3.43 | 5.01 | 3.6  |
| 22 | 7.10.20    | 4032 | 190 | INSEMINATION 2 | 124 | 3.85 | 3.18 | 5.13 | 4.1  |
| 23 | 14.10.20   | 4032 | 197 | INSEMINATION 2 | 124 | 3.76 | 3.1  | 5.16 | 3.68 |
| 24 | 22.10.20   | 4032 | 205 | INSEMINATION 2 | 57  | 3.54 | 3.49 | 4.92 | 4.2  |
| 25 | 28.10.20   | 4032 | 211 | INSEMINATION 2 | 57  | 3.37 | 3.16 | 5.06 | 2.74 |
| 26 | 04.11.20   | 4032 | 218 | INSEMINATION 3 | 57  | 3.5  | 3.59 | 4.96 | 4.19 |
| 27 | 11.11.2020 | 4032 | 225 | INSEMINATION 3 | 87  | 3.83 | 3.22 | 5.14 | 4.33 |
| 28 | 26.11.2020 | 4032 | 240 | INSEMINATION 3 | 87  | 3.41 | 3.57 | 5.01 | 3.61 |
| 29 | 3.12.2020  | 4032 | 247 | INSEMINATION 3 | 87  | 2.85 | 3.53 | 4.94 | 4.11 |
| 30 | 09.12.2020 | 4032 | 253 | INSEMINATION 4 | 87  | 3.49 | 3.24 | 5.1  | 4.4  |
| 31 | 16.12.2020 | 4032 | 260 | INSEMINATION 4 | 92  | 4.94 | 3.2  | 5.11 | 3.99 |
| 32 | 23.12.2020 | 4032 | 267 | INSEMINATION 4 | 92  | 3.94 | 3.23 | 5.14 | 4.4  |
| 33 | 30.12.2021 | 4032 | 274 | INSEMINATION 5 | 92  | 3.71 | 3.28 | 5.07 | 3.65 |
| 34 | 06.1.2021  | 4032 | 281 | INSEMINATION 5 | 92  | 3.78 | 3.14 | 5.13 | 3.51 |
| 35 | 13.1.2021  | 4032 | 288 | INSEMINATION 5 | 51  | 3.9  | 3.49 | 5.06 | 3.8  |
| 36 | 27.1.2021  | 4032 | 302 | INSEMINATION 5 | 51  | 3.73 | 3.38 | 5.07 | 3.41 |
| 37 | 04.02.2021 | 4032 | 310 | INSEMINATION 6 | 51  | 3.52 | 3.29 | 5.01 | 3.47 |
| 38 | 11.02.2021 | 4032 | 317 | INSEMINATION 6 | 51  | 3.75 | 3.24 | 5.11 | 3.6  |
| 39 | 17.02.2021 | 4032 | 323 | INSEMINATION 6 | 49  | 3.55 | 3.2  | 5.02 | 3.8  |
| 40 | 23.02.2021 | 4032 | 329 | INSEMINATION 6 | 49  | 3.74 | 3.32 | 5.01 | 3.9  |
| 41 | 04.03.2021 | 4032 | 338 | INSEMINATION 6 | 49  | 3.96 | 3.45 | 5.01 | 4.19 |

|    |            |      |     |                |    |      |      |      |      |
|----|------------|------|-----|----------------|----|------|------|------|------|
| 42 | 11.03.2021 | 4032 |     | INSEMINATION 6 |    |      |      |      |      |
| 43 | 18.03.2021 | 4032 | 352 | INSEMINATION 6 | 82 | 3.88 | 3.25 | 5.18 | 3.9  |
| 44 | 25.03.2021 | 4032 | 359 | INSEMINATION 6 | 82 | 3.65 | 3.47 | 4.95 | 3.95 |
| 45 | 05.04.2021 | 4032 | 370 | INSEMINATION 6 | 82 | 3.67 | 3.61 | 4.48 | 3.49 |
| 46 | 12.04.2021 | 4032 | 377 | INSEMINATION 6 | 45 | 3.46 | 3.32 | 4.57 |      |
| 47 | 19.04.2021 | 4032 | 384 | INSEMINATION 7 | 45 | 3.54 | 3.43 | 5.04 | 4.4  |
| 48 | 26.04.2021 | 4032 | 391 | INSEMINATION 7 | 45 | 3.25 | 3.43 | 4.9  | 3.97 |
| 49 | 05.05.2021 | 4032 | 400 | INSEMINATION 7 | 45 | 4.04 | 3.37 | 5.08 | 3.2  |
| 50 | 19.05.2021 | 4032 |     | INSEMINATION 7 |    |      |      |      |      |
| 51 | 26.05.2021 | 4032 | 414 | INSEMINATION 7 | 66 | 3.65 | 3.29 | 4.84 | 4.37 |

**n = 3**

| <b>week</b> | <b>DATE</b> | <b>cow number</b> | <b>DIM (days in milk)</b> | <b>state</b>   | <b>SCC (10<sup>3</sup>/mL)</b> | <b>% Fat</b> | <b>Protein %</b> | <b>Lactose %</b> | <b>MFG Average diameter</b> |
|-------------|-------------|-------------------|---------------------------|----------------|--------------------------------|--------------|------------------|------------------|-----------------------------|
| 1           | 26.11.2020  | 3802              | 39                        | NON-PREGNANT   | 12                             | 4.09         | 3.79             | 4.89             | 4.35                        |
| 2           | 03.12.2020  | 3802              | 46                        | NON-PREGNANT   | 12                             | 3.95         | 3.72             | 4.5              | 5                           |
| 3           | 09.12.2020  | 3802              | 52                        | NON-PREGNANT   | 12                             | 2.82         | 3.81             | 4.36             | 4.56                        |
| 4           | 16.12.2020  | 3802              | 59                        | NON-PREGNANT   | 13                             | 4.07         | 3.9              | 4.63             | 4.38                        |
| 5           | 23.12.2020  | 3802              | 66                        | NON-PREGNANT   | 13                             | 3.79         | 3.55             | 4.82             | 4.19                        |
| 6           | 30.12.2020  | 3802              | 73                        | INSEMINATION 1 | 13                             | 3.81         | 3.47             | 5.04             | 4.1                         |
| 7           | 06.1.2021   | 3802              | 80                        | INSEMINATION 1 | 13                             | 3.69         | 3.78             | 4.76             | 3.87                        |
| 8           | 13.1.2021   | 3802              | 87                        | INSEMINATION 1 | 8                              | 2.47         | 3.81             | 4.31             | 3.43                        |
| 9           | 27.1.2021   | 3802              | 101                       | INSEMINATION 2 | 8                              | 3.75         | 3.5              | 4.81             | 4.64                        |
| 10          | 04.02.2021  | 3802              | 109                       | INSEMINATION 2 | 8                              | 3.82         | 3.49             | 5.01             | 4.4                         |
| 11          | 11.02.2021  | 3802              | 116                       | INSEMINATION 2 | 8                              | 4.37         | 3.44             | 4.79             | 3.41                        |

|    |            |      |     |                |    |      |      |      |      |
|----|------------|------|-----|----------------|----|------|------|------|------|
| 12 | 17.02.2021 | 3802 | 122 | INSEMINATION 2 | 12 | 4.36 | 3.43 | 4.82 | 3.5  |
| 13 | 23.02.2021 | 3802 | 128 | INSEMINATION 2 | 12 | 3.99 | 3.87 | 4.62 | 3.6  |
| 14 | 04.03.2021 | 3802 | 137 | INSEMINATION 3 | 12 | 4.12 | 3.72 | 4.7  | 4.35 |
| 15 | 11.03.2021 | 3802 |     | INSEMINATION 3 |    |      |      |      |      |
| 16 | 18.03.2021 | 3802 | 151 | INSEMINATION 3 | 23 | 3.85 | 3.67 | 4.68 | 3.86 |
| 17 | 25.03.2021 | 3802 | 158 | INSEMINATION 3 | 23 | 4.08 | 3.94 | 4.73 | 3.42 |
| 18 | 05.04.2021 | 3802 | 169 | INSEMINATION 4 | 23 | 3.5  | 4.02 | 4.27 | 3    |
| 19 | 12.04.2021 | 3802 | 176 | INSEMINATION 4 | 20 | 4.64 | 3.46 | 4.88 | 3.69 |
| 20 | 19.04.2021 | 3802 | 183 | INSEMINATION 5 | 20 | 4.79 | 3.57 | 4.35 | 3.2  |
| 21 | 26.04.2021 | 3802 | 190 | INSEMINATION 5 | 20 | 3.58 | 3.51 | 4.95 | 4    |
| 22 | 05.05.2021 | 3802 | 199 | INSEMINATION 5 | 20 | 4.24 | 3.46 | 4.85 | 3.43 |
| 23 | 19.05.2021 | 3802 |     | INSEMINATION 6 |    |      |      |      |      |
| 24 | 26.05.2021 | 3802 | 213 | INSEMINATION 6 | 36 | 4.42 | 3.56 | 4.76 | 4.51 |

n =4

| week | DATE       | cow number | DIM (days in milk) | state          | SCC (10 <sup>3</sup> /mL) | % Fat | Protein % | Lactose % | MFG Average diameter |
|------|------------|------------|--------------------|----------------|---------------------------|-------|-----------|-----------|----------------------|
| 1    | 23.12.2020 | 3971       | 33                 | NON-PREGNANT   | 32                        | 3.45  | 3.41      | 5.01      | 4.21                 |
| 2    | 06.1.2021  | 3971       | 47                 | NON-PREGNANT   | 32                        | 3.42  | 3.37      | 4.98      | 4.59                 |
| 3    | 13.1.2021  | 3971       | 54                 | NON-PREGNANT   | 7                         | 2.72  | 3.28      | 5.04      | 4.08                 |
| 4    | 27.1.2021  | 3971       | 68                 | NON-PREGNANT   | 7                         | 3.61  | 3.29      | 5.03      | 4.54                 |
| 5    | 04.02.2021 | 3971       | 76                 | NON-PREGNANT   | 7                         | 3.38  | 3.37      | 4.91      | 4.3                  |
| 6    | 11.02.2021 | 3971       | 83                 | NON-PREGNANT   | 7                         | 3.53  | 3.38      | 4.93      | 3.4                  |
| 7    | 17.02.2021 | 3971       | 89                 | NON-PREGNANT   | 7                         | 3.64  | 3.44      | 4.92      | 4.2                  |
| 8    | 23.02.2021 | 3971       | 95                 | NON-PREGNANT   | 7                         | 3.67  | 3.5       | 4.76      | 3.12                 |
| 9    | 04.03.2021 | 3971       | 104                | INSEMINATION 1 | 7                         | 3.45  | 3.26      | 4.99      | 4.21                 |

|    |            |      |     |                |    |      |      |      |      |
|----|------------|------|-----|----------------|----|------|------|------|------|
| 10 | 11.03.2021 | 3971 |     | INSEMINATION 1 |    |      |      |      |      |
| 11 | 18.03.2021 | 3971 | 118 | INSEMINATION 1 | 29 | 3.74 | 3.48 | 4.88 | 4.39 |
| 12 | 25.03.2021 | 3971 | 125 | INSEMINATION 1 | 29 | 3.64 | 3.84 | 4.81 | 3.71 |
| 13 | 05.04.2021 | 3971 | 136 | INSEMINATION 2 | 29 | 3.68 | 3.69 | 4.59 | 4.2  |
| 14 | 12.04.2021 | 3971 | 143 | INSEMINATION 2 | 17 | 3.63 | 3.38 | 4.69 | 3.8  |
| 15 | 19.04.2021 | 3971 | 150 | INSEMINATION 2 | 17 | 3.34 | 3.33 | 4.75 | 3.6  |
| 16 | 26.04.2021 | 3971 | 157 | INSEMINATION 2 | 17 | 3.31 | 3.55 | 4.92 | 3.89 |
| 17 | 05.05.2021 | 3971 | 166 | INSEMINATION 2 | 17 | 3.48 | 3.29 | 4.97 | 3.82 |
| 18 | 19.05.2021 | 3971 |     | INSEMINATION 2 |    |      |      |      |      |
| 19 | 26.05.2021 | 3971 | 180 | INSEMINATION 3 | 19 | 3.56 | 3.48 | 4.95 | 4.21 |

**n = 5**

| <b>Week</b> | <b>DATE</b> | <b>cow number</b> | <b>DIM (days in milk)</b> | <b>state</b>   | <b>SCC (10<sup>3</sup>/mL)</b> | <b>% Fat</b> | <b>Protein %</b> | <b>Lactose %</b> | <b>MFG Average diameter</b> |
|-------------|-------------|-------------------|---------------------------|----------------|--------------------------------|--------------|------------------|------------------|-----------------------------|
| 1           | 04.02.2021  | 3915              | 60                        | NON-PREGNANT   | 16                             | 3.48         | 3.03             | 4.92             | 3.6                         |
| 2           | 11.02.2021  | 3915              | 67                        | NON-PREGNANT   | 16                             | 3.58         | 3                | 4.93             | 3.22                        |
| 3           | 17.02.2021  | 3915              | 73                        | NON-PREGNANT   | 22                             | 2.92         | 3                | 4.85             | 2.7                         |
| 4           | 23.02.2021  | 3915              | 79                        | NON-PREGNANT   | 22                             | 3.61         | 3.2              | 4.8              | 3.7                         |
| 5           | 04.03.2021  | 3915              | 88                        | INSEMINATION 1 | 22                             | 3.38         | 3.1              | 4.52             | 4.16                        |
| 6           | 11.03.2021  | 3915              |                           | INSEMINATION 1 |                                |              |                  |                  |                             |
| 7           | 18.03.2021  | 3915              | 102                       | INSEMINATION 1 | 46                             | 3.56         | 3.04             | 4.8              | 3.8                         |
| 8           | 25.03.2021  | 3915              | 109                       | INSEMINATION 1 | 46                             | 3.4          | 3.4              | 4.82             | 3.73                        |
| 9           | 05.04.2021  | 3915              | 120                       | INSEMINATION 1 | 46                             | 2.94         | 3.41             | 4.42             | 2.6                         |
| 10          | 12.04.2021  | 3915              | 127                       | INSEMINATION 1 | 20                             | 3.76         | 3.12             | 4.94             | 3.24                        |

|    |            |      |     |                |    |      |      |      |      |
|----|------------|------|-----|----------------|----|------|------|------|------|
| 11 | 19.04.2021 | 3915 | 134 | INSEMINATION 1 | 20 | 3.62 | 3.05 | 4.91 | 3.3  |
| 12 | 26.04.2021 | 3915 | 141 | INSEMINATION 1 | 20 | 4.04 | 3.47 | 4.84 | 3.69 |
| 13 | 05.05.2021 | 3915 | 150 | INSEMINATION 2 | 20 | 3.47 | 3.12 | 4.96 | 3.75 |
| 14 | 19.05.2021 | 3915 |     | INSEMINATION 2 |    |      |      |      |      |
| 15 | 26.05.2021 | 3915 | 164 | INSEMINATION 2 | 40 | 3.87 | 3.18 | 4.98 | 3.76 |

**n = 6**

| week | DATE       | cow number | DIM (days in milk) | state          | SCC (10 <sup>3</sup> /mL) | % Fat | Protein % | Lactose % | MFG Average diameter |
|------|------------|------------|--------------------|----------------|---------------------------|-------|-----------|-----------|----------------------|
| 1    | 18.03.2021 | 3991       | 60                 | NON-PREGNANT   | 566                       | 3.43  | 3.21      | 4.91      | 4.34                 |
| 2    | 25.03.2021 | 3991       | 67                 | NON-PREGNANT   | 566                       | 1.15  | 3.34      | 4.8       | 3.98                 |
| 3    | 05.04.2021 | 3991       | 67                 | NON-PREGNANT   | 566                       | 1.15  | 3.34      | 4.8       | 3.98                 |
| 4    | 12.04.2021 | 3991       | 78                 | NON-PREGNANT   | 566                       | 3.48  | 3.58      | 4.3       | 4.1                  |
| 5    | 19.04.2021 | 3991       | 85                 | NON-PREGNANT   | 18                        | 3.23  | 3.02      | 5         | 4.3                  |
| 6    | 26.04.2021 | 3991       | 99                 | INSEMINATION 1 | 18                        | 3.58  | 3.67      | 4.85      | 3.616                |
| 7    | 05.05.2021 | 3991       | 108                | INSEMINATION 1 | 18                        | 3.59  | 3.42      | 4.88      | 3.48                 |
| 8    | 19.05.2021 | 3991       |                    | INSEMINATION 1 |                           |       |           |           |                      |
| 9    | 26.05.2021 | 3991       | 122                | INSEMINATION 2 | 13                        | 3.14  | 3.27      | 4.73      | 4.6                  |



**n = 7**

| <b>week</b> | <b>DATE</b> | <b>cow number</b> | <b>DIM (days in milk)</b> | <b>state</b>   | <b>SCC (10<sup>3</sup>/mL)</b> | <b>% Fat</b> | <b>Protein %</b> | <b>Lactose %</b> | <b>MFG Average diameter</b> |
|-------------|-------------|-------------------|---------------------------|----------------|--------------------------------|--------------|------------------|------------------|-----------------------------|
| 1           | 18.03.2021  | 3986              | 59                        | NON-PREGNANT   | 26                             | 3.24         | 3.49             | 4.72             | 3.3                         |
| 2           | 25.03.2021  | 3986              | 66                        | INSEMINATION 1 | 26                             | 2.75         | 3.77             | 4.49             | 3.4                         |
| 3           | 05.04.2021  | 3986              | 77                        | INSEMINATION 1 | 26                             | 3.27         | 3.51             | 4.59             | 3.8                         |
| 4           | 12.04.2021  | 3986              | 84                        | INSEMINATION 2 | 40                             | 3.61         | 3.15             | 4.81             | 3.95                        |
| 5           | 19.04.2021  | 3986              | 91                        | INSEMINATION 2 | 40                             | 3.33         | 3.47             | 4.66             | 3.7                         |
| 6           | 26.04.2021  | 3986              | 98                        | INSEMINATION 2 | 40                             | 2.94         | 3.66             | 4.57             | 3.4                         |
| 7           | 05.05.2021  | 3986              | 107                       | INSEMINATION 3 | 40                             | 3.23         | 3.32             | 4.66             | 4.04                        |
| 8           | 19.05.2021  | 3986              |                           | INSEMINATION 3 |                                |              |                  |                  |                             |
| 9           | 26.05.2021  | 3986              | 121                       | INSEMINATION 3 | 51                             | 3.3          | 3.41             | 4.7              | 4.43                        |

**n=8**

| <b>week</b> | <b>DATE</b> | <b>cow number</b> | <b>DIM (days in milk)</b> | <b>state</b>   | <b>SCC (10<sup>3</sup>/mL)</b> | <b>% Fat</b> | <b>Protein %</b> | <b>Lactose %</b> | <b>MFG Average diameter</b> |
|-------------|-------------|-------------------|---------------------------|----------------|--------------------------------|--------------|------------------|------------------|-----------------------------|
| 1           | 24.6.20     | 3871              | 45                        | NON- PREGNANT  | 35                             | 3.07         | 3.14             | 5.03             | 4.06                        |
| 2           | 1.7.20      | 3871              | 52                        | NON- PREGNANT  | 35                             | 3.1          | 3.12             | 5.06             | 3.76                        |
| 3           |             |                   |                           | NON- PREGNANT  |                                |              |                  |                  |                             |
| 4           | 15.7.20     | 3871              | 66                        | NON- PREGNANT  | 58                             | 3.15         | 2.99             | 5.08             | 4.24                        |
| 5           | 21.7.20     | 3871              | 72                        | INSEMINATION 1 | 58                             | 3.01         | 3.01             | 5.06             | 4.6                         |
| 6           | 27.7.20     | 3871              | 78                        | INSEMINATION 1 | 58                             | 3.05         | 3.02             | 4.96             | 3.95                        |
| 7           | 05.08.20    | 3871              | 87                        | INSEMINATION 1 | 58                             | 3.23         | 3.39             | 4.9              | 4.04                        |
| 8           | 12.08.20    | 3871              | 94                        | INSEMINATION 1 | 92                             | 2.93         | 3.02             | 4.86             | 3.96                        |

|    |            |      |     |                          |     |      |      |      |      |
|----|------------|------|-----|--------------------------|-----|------|------|------|------|
| 9  | 19.08.20   | 3871 | 101 | INSEMINATION 1           | 92  | 3.2  | 3.11 | 5    | 4.11 |
| 10 | 26.08.20   | 3871 | 108 | INSEMINATION 1           | 92  | 2.53 | 2.92 | 5.14 | 3.59 |
| 11 | 02.09.20   | 3871 | 115 | INSEMINATION 1           | 92  | 3.26 | 3.12 | 4.86 | 4    |
| 12 | 09.09.20   | 3871 | 122 | INSEMINATION 1           | 92  | 3.51 | 3.08 | 5.04 | 4.29 |
| 13 | 16.09.20   | 3871 | 129 | INSEMINATION 2           | 140 | 2.89 | 3.01 | 5.01 | 3.75 |
| 14 |            |      |     | INSEMINATION 2           |     |      |      |      |      |
| 15 | 1.10.20    | 3871 | 144 | INSEMINATION 2           | 140 | 3.28 | 3.2  | 5.04 | 3.49 |
| 16 | 7.10.20    | 3871 | 150 | INSEMINATION 2           | 140 | 3.38 | 3.6  | 4.6  | 3.88 |
| 17 | 14.10.20   | 3871 | 157 | INSEMINATION 2           | 140 | 3.28 | 3.25 | 5.01 | 3.3  |
| 18 | 22.10.20   | 3871 | 165 | INSEMINATION 2           | 145 | 3.38 | 3.15 | 5.02 | 3.46 |
| 19 | 28.10.20   | 3871 | 171 | INSEMINATION 2           | 145 | 3.2  | 3.12 | 4.87 | 3.2  |
| 20 | 4.11.20    | 3871 | 178 | INSEMINATION 3/ PREGNANT | 145 | 3.39 | 3.14 | 4.98 | 3.69 |
| 21 | 11.11.2020 | 3871 | 185 | INSEMINATION 3/ PREGNANT | 219 | 3.1  | 3.18 | 4.95 | 3.78 |
| 22 | 26.11.2020 | 3871 | 200 | INSEMINATION 3/ PREGNANT | 219 | 3.25 | 3.23 | 4.87 | 3.7  |
| 23 | 03.12.2020 | 3871 | 207 | INSEMINATION 3/ PREGNANT | 219 | 3.09 | 3.52 | 4.8  | 3.7  |
| 24 | 09.12.2020 | 3871 | 213 | INSEMINATION 3/ PREGNANT | 219 | 1.62 | 3.05 | 5.03 | 3.96 |
| 25 | 16.12.2020 | 3871 | 220 | INSEMINATION 3/ PREGNANT | 281 | 1.83 | 3.18 | 4.95 | 3.7  |

**n = 9**

| <b>week</b> | <b>DATE</b> | <b>cow number</b> | <b>DIM (days in milk)</b> | <b>state</b>   | <b>SCC (10<sup>3</sup>/mL)</b> | <b>% Fat</b> | <b>Protein %</b> | <b>Lactose %</b> | <b>MFG Average diameter</b> |
|-------------|-------------|-------------------|---------------------------|----------------|--------------------------------|--------------|------------------|------------------|-----------------------------|
| 1           | 24.6.20     | 3943              | 49                        | NON-PREGNANT   | 82                             | 3.46         | 3.37             | 5.14             | 3.41                        |
| 2           | 1.7.20      | 3943              | 56                        | NON-PREGNANT   | 82                             | 3.05         | 3.56             | 5.08             | 3.89                        |
| 3           |             |                   |                           | NON-PREGNANT   |                                |              |                  |                  |                             |
| 4           | 15.7.20     | 3943              | 70                        | INSEMINATION 1 | 53                             | 3.39         | 3.39             | 5.11             | 3.66                        |

|    |            |      |     |                         |     |      |      |      |      |
|----|------------|------|-----|-------------------------|-----|------|------|------|------|
| 5  | 21.7.20    | 3943 | 76  | INSEMINATION 1          | 53  | 3.44 | 3.41 | 5.1  | 3.85 |
| 6  | 27.7.20    | 3943 | 82  | INSEMINATION 1          | 53  | 3.58 | 3.37 | 5.09 | 3.59 |
| 7  | 05.08.20   | 3943 | 91  | INSEMINATION 2          | 53  | 3.63 | 3.49 | 4.94 | 3.66 |
| 8  | 12.08.20   | 3943 | 98  | INSEMINATION 2          | 55  | 3.16 | 3.36 | 4.95 | 3.6  |
| 9  | 19.08.20   | 3943 | 105 | INSEMINATION 2          | 55  | 3.54 | 3.4  | 5.03 | 3.8  |
| 10 | 26.08.20   | 3943 | 112 | INSEMINATION 2          | 55  | 3.97 | 3.45 | 4.82 | 4.38 |
| 11 | 02.09.20   | 3943 | 119 | INSEMINATION 2          | 55  | 3.95 | 3.3  | 4.96 | 3.2  |
| 12 | 09.09.20   | 3943 | 126 | INSEMINATION 3          | 55  | 4.16 | 3.49 | 4.9  | 3.46 |
| 13 | 16.09.20   | 3943 | 133 | INSEMINATION 3          | 67  | 3.56 | 3.23 | 4.96 | 2.99 |
| 14 |            |      |     | INSEMINATION 3          |     |      |      |      |      |
| 15 | 1.10.20    | 3943 | 148 | INSEMINATION 4          | 67  | 3.39 | 3.18 | 4.93 | 3.76 |
| 16 | 7.10.20    | 3943 | 154 | INSEMINATION 4          | 67  | 3.8  | 3.41 | 4.84 | 3.8  |
| 17 | 14.10.20   | 3943 | 161 | INSEMINATION 4          | 67  | 3.89 | 3.34 | 4.92 | 3.41 |
| 18 | 22.10.20   | 3943 | 169 | INSEMINATION 4          | 57  | 3.83 | 3.29 | 4.94 | 3.54 |
| 19 | 28.10.20   | 3943 | 175 | INSEMINATION 4          | 57  | 3.59 | 3.26 | 4.89 | 3.03 |
| 20 | 4.11.20    | 3943 | 182 | INSEMINATION 4          | 57  | 3.99 | 3.32 | 4.98 | 3.26 |
| 21 | 11.11.2020 | 3943 | 189 | INSEMINATION 4          | 109 | 3.5  | 3.36 | 4.58 | 2.94 |
| 22 | 26.11.2020 | 3943 | 204 | INSEMINATION 4          | 109 | 3.74 | 3.77 | 4.73 | 3.34 |
| 23 | 3.12.2020  | 3943 | 211 | INSEMINATION 5          | 109 | 4.17 | 3.67 | 4.73 | 3.5  |
| 24 | 09.12.2020 | 3943 | 217 | INSEMINATION 5          | 109 | 3.97 | 3.45 | 4.97 | 3.74 |
| 25 | 16.12.2020 | 3943 | 224 | INSEMINATION 5          | 90  | 4.03 | 3.72 | 4.93 | 3.74 |
| 26 | 23.12.2020 | 3943 | 231 | INSEMINATION 6/PREGNANT | 90  | 3.97 | 3.42 | 4.97 | 3.56 |
| 27 | 30_12_2020 | 3943 | 238 | INSEMINATION 6/PREGNANT | 90  | 3.48 | 3.53 | 4.51 | 3.09 |
| 28 | 06.1.2021  | 3943 | 245 | INSEMINATION 6/PREGNANT | 90  | 3.7  | 3.47 | 4.81 |      |
| 29 | 13.1.2021  | 3943 | 252 | INSEMINATION 6/PREGNANT | 272 | 3.12 | 3.58 | 4.37 | 3.04 |
| 30 | 27.1.2021  | 3943 | 266 | INSEMINATION 6/PREGNANT | 272 | 4.42 | 3.54 | 4.97 | 3.6  |
| 31 | 04.02.2021 | 3943 | 274 | INSEMINATION 6/PREGNANT | 272 | 3.32 | 3.41 | 4.72 | 3.09 |

**n = 10**

| <b>week</b> | <b>DATE</b> | <b>cow<br/>number</b> | <b>DIM (days<br/>in milk)</b> | <b>state</b>            | <b>SCC<br/>(10<sup>3</sup>/mL)</b> | <b>% Fat</b> | <b>Protein<br/>%</b> | <b>Lactose<br/>%</b> | <b>MFG<br/>Average<br/>diameter</b> |
|-------------|-------------|-----------------------|-------------------------------|-------------------------|------------------------------------|--------------|----------------------|----------------------|-------------------------------------|
| 1           | 26.11.2020  | 3509                  | 42                            | NON-PREGNANT            | 89                                 | 3.16         | 3.23                 | 4.82                 | 4                                   |
| 2           | 03.12.2020  | 3509                  | 49                            | NON-PREGNANT            | 89                                 | 3.13         | 3.54                 | 4.67                 | 4.68                                |
| 3           | 09.12.2020  | 3509                  | 55                            | NON-PREGNANT            | 89                                 | 2.77         | 3.47                 | 4.47                 | 4.71                                |
| 4           | 16.12.2020  | 3509                  | 62                            | NON-PREGNANT            | 55                                 | 2.62         | 3.44                 | 4.9                  | 4.31                                |
| 5           | 23.12.2020  | 3509                  | 69                            | INSEMINATION 1          | 55                                 | 3.49         | 3.32                 | 4.89                 | 3.7                                 |
| 6           | 06.1.2021   | 3509                  | 83                            | INSEMINATION 1          | 55                                 | 1.59         | 3.06                 | 5                    | 3.6                                 |
| 7           | 13.1.2021   | 3509                  | 90                            | INSEMINATION 1          | 64                                 | 2.8          | 3.21                 | 4.9                  | 3.5                                 |
| 8           | 27.1.2021   | 3509                  | 104                           | INSEMINATION 1          | 64                                 | 2.99         | 3.4                  | 4.47                 | 4.23                                |
| 9           | 04.02.2021  | 3509                  | 112                           | INSEMINATION 2/PREGNANT | 63                                 | 2.05         | 3.04                 | 4.96                 | 3.59                                |
| 10          | 11.02.2021  | 3509                  | 119                           | INSEMINATION 2/PREGNANT | 64                                 | 3.24         | 3.27                 | 4.91                 | 4.06                                |
| 11          | 17.02.2021  | 3509                  | 125                           | INSEMINATION 2/PREGNANT | 40                                 | 3.41         | 3.19                 | 4.84                 | 3.7                                 |
| 12          | 23.02.2021  | 3509                  | 131                           | INSEMINATION 2/PREGNANT | 40                                 | 3.82         | 3.42                 | 4.89                 | 3.2                                 |
| 13          | 04.03.2021  | 3509                  | 140                           | INSEMINATION 2/PREGNANT | 40                                 | 3.28         | 3.32                 | 4.79                 | 4.4                                 |
| 14          | 11.03.2021  | 3509                  |                               | INSEMINATION 2/PREGNANT |                                    |              |                      |                      |                                     |
| 15          | 18.03.2021  | 3509                  | 154                           | INSEMINATION 2/PREGNANT | 61                                 | 3.67         | 3.47                 | 4.83                 | 3.19                                |
| 16          | 25.03.2021  | 3509                  | 161                           | INSEMINATION 2/PREGNANT | 61                                 | 2.92         | 3.46                 | 4.19                 | 3.59                                |

**n = 11**

| <b>week</b> | <b>DATE</b> | <b>cow<br/>number</b> | <b>DIM<br/>(days<br/>in<br/>milk)</b> | <b>state</b>            | <b>SCC<br/>(10<sup>3</sup>/mL)</b> | <b>Fat<br/>%</b> | <b>Protein<br/>%</b> | <b>Lactose<br/>%</b> | <b>MFG<br/>Average<br/>diameter</b> |
|-------------|-------------|-----------------------|---------------------------------------|-------------------------|------------------------------------|------------------|----------------------|----------------------|-------------------------------------|
| 1           | 26.11.2020  | 4082                  | 63                                    | NON-PREGNANT            | 103                                | 3.46             | 3.65                 | 4.92                 | 3.85                                |
| 2           | 03.12.2020  | 4082                  | 70                                    | NON-PREGNANT            | 103                                | 3.92             | 3.54                 | 4.89                 | 3.54                                |
| 3           | 09.12.2020  | 4082                  | 76                                    | NON-PREGNANT            | 103                                | 3.93             | 3.44                 | 4.77                 | 4.4                                 |
| 4           | 16.12.2020  | 4082                  | 83                                    | NON-PREGNANT            | 216                                | 3.8              | 3.63                 | 4.78                 | 3.62                                |
| 5           | 23.12.2020  | 4082                  | 90                                    | NON-PREGNANT            | 213                                | 3.79             | 3.29                 | 5.04                 | 4.3                                 |
| 6           | 06.1.2021   | 4082                  | 104                                   | NON-PREGNANT            | 213                                | 3.96             | 3.37                 | 4.94                 | 3.86                                |
| 7           | 13.1.2021   | 4082                  | 111                                   | INSEMINATION 1/PREGNANT | 127                                | 3.85             | 3.29                 | 4.92                 | 3.78                                |
| 8           | 27.1.2021   | 4082                  | 125                                   | INSEMINATION 1/PREGNANT | 127                                | 4.11             | 3.5                  | 4.86                 | 4.06                                |
| 9           | 04.02.2021  | 4082                  | 133                                   | INSEMINATION 1/PREGNANT | 127                                | 4.03             | 3.42                 | 4.83                 | 3.87                                |
| 10          | 11.02.2021  | 4082                  | 140                                   | INSEMINATION 1/PREGNANT | 127                                | 3.83             | 3.39                 | 4.78                 | 3.49                                |
| 11          | 17.02.2021  | 4082                  | 146                                   | INSEMINATION 1/PREGNANT | 47                                 | 2.65             | 3.65                 | 4.34                 | 3.85                                |
| 12          | 23.02.2021  | 4082                  | 152                                   | INSEMINATION 1/PREGNANT | 47                                 | 4.11             | 3.44                 | 4.77                 | 3.7                                 |
| 13          | 04.03.2021  | 4082                  | 161                                   | INSEMINATION 1/PREGNANT | 47                                 | 4.07             | 3.16                 | 4.83                 | 3.68                                |

n = 12

| week | DATE       | cow number | DIM (days in milk) | STATE                   | SCC (10 <sup>3</sup> /mL) | Fat % | Protein % | Lactose % | MFG Average diameter |
|------|------------|------------|--------------------|-------------------------|---------------------------|-------|-----------|-----------|----------------------|
| 1    | 26.11.2020 | 3729       | 52                 | NON-PREGNANT            | 28                        | 2.93  | 3.26      | 4.82      | 4.2                  |
| 2    | 03.12.2020 | 3729       | 59                 | NON-PREGNANT            | 28                        | 2.77  | 3.54      | 4.43      | 4.23                 |
| 3    | 09.12.2020 | 3729       | 65                 | NON-PREGNANT            | 28                        | 3.85  | 3.03      | 4.87      | 4.47                 |
| 4    | 16.12.2020 | 3729       | 72                 | NON-PREGNANT            | 23                        | 2.78  | 3.56      | 4.65      | 4.3                  |
| 5    | 23.12.2020 | 3729       | 79                 | NON-PREGNANT            | 23                        | 3.16  | 3.2       | 4.7       | 5.1                  |
| 6    | 06.1.2021  | 3729       | 93                 | INSEMINATION 1          | 23                        | 2.62  | 3.3       | 4.61      | 3.7                  |
| 7    | 13.1.2021  | 3729       | 100                | INSEMINATION 1          | 22                        | 3.38  | 3.36      | 4.7       | 4.82                 |
| 8    | 27.1.2021  | 3729       | 114                | INSEMINATION 2          | 22                        | 2.89  | 3.22      | 4.61      | 4.1                  |
| 9    | 04.02.2021 | 3729       | 122                | INSEMINATION 2          | 22                        | 2.96  | 3.16      | 4.78      | 3.79                 |
| 10   | 11.02.2021 | 3729       | 129                | INSEMINATION 3          | 22                        | 3.46  | 3.18      | 4.79      | 3.34                 |
| 11   | 17.02.2021 | 3729       | 135                | INSEMINATION 3          | 34                        | 2.85  | 3.37      | 4.52      | 3.6                  |
| 12   | 23.02.2021 | 3729       | 141                | INSEMINATION 4          | 34                        | 3.38  | 3.3       | 4.7       | 3.7                  |
| 13   | 04.03.2021 | 3729       | 150                | INSEMINATION 4          | 34                        | 2.89  | 3.17      | 4.68      | 4.11                 |
| 14   | 11.03.2021 | 3729       |                    | INSEMINATION 4          |                           |       |           |           |                      |
| 15   | 18.03.2021 | 3729       | 164                | INSEMINATION 5/PREGNANT | 34                        | 2.94  | 3.15      | 4.67      | 4.6                  |
| 16   | 25.03.2021 | 3729       | 171                | INSEMINATION 5/PREGNANT | 34                        | 2.9   | 3.71      | 4.67      | 4.16                 |
| 17   | 05.04.2021 | 3729       | 182                | INSEMINATION 5/PREGNANT | 34                        | 3.03  | 3.27      | 4.38      | 4.94                 |
| 18   | 12.04.2021 | 3729       | 189                | INSEMINATION 5/PREGNANT | 62                        | 3.09  | 3.17      | 4.57      | 3.8                  |
| 19   | 19.04.2021 | 3729       | 196                | INSEMINATION 5/PREGNANT | 62                        | 3.22  | 3.22      | 4.7       | 4                    |
| 20   | 26.04.2021 | 3729       | 203                | INSEMINATION 5/PREGNANT | 62                        | 3.52  | 3.45      | 4.66      | 4                    |

**Table S1B:** Microwave Dielectric fitting parameters (Cole-Cole: dielectric strength-  $\Delta\epsilon$ , relaxation time  $\tau$ (s), broadening parameter- $\alpha$ , and conductivity- $\sigma$ (Siemens/m) measured **weekly** for n = 12 different cows at different reproductive states (Non-pregnant-NP, during inseminations and during confirmed pregnancy). The not measured days correspond mostly to Saturdays an official holiday in Israel.

**n = 1**

| week | DATE     | cow number | STATE          | $\Delta\epsilon$ | $\tau$ (s) | $\alpha$ | $\sigma$ (S/m) |
|------|----------|------------|----------------|------------------|------------|----------|----------------|
| 1    | 13.5.20  | 4027       | NON-PREGNANT   | 60.90            | 8.48E-12   | 0.98     | 0.51           |
| 2    | 20.5.20  | 4027       | NON-PREGNANT   | 56.93            | 8.69E-12   | 0.98     | 0.45           |
| 3    | 27.5.20  | 4027       | NON-PREGNANT   | 61.28            | 8.58E-12   | 0.97     | 0.50           |
| 4    | 3.6.20   | 4027       | NON-PREGNANT   | 60.22            | 8.71E-12   | 0.98     | 0.51           |
| 5    | 10.6.20  | 4027       | NON-PREGNANT   | 61.12            | 9.13E-12   | 0.97     | 0.52           |
| 6    | 17.6.20  | 4027       | NON-PREGNANT   | 59.93            | 9.02E-12   | 0.99     | 0.50           |
| 7    | 24.6.20  | 4027       | INSEMINATION 1 | 60.36            | 8.70E-12   | 0.98     | 0.47           |
| 8    | 1.7.20   | 4027       | INSEMINATION 1 | 58.54            | 8.87E-12   | 0.98     | 0.51           |
| 9    |          |            | INSEMINATION 1 |                  |            |          |                |
| 10   | 15.7.20  | 4027       | INSEMINATION 1 | 58.11            | 9.13E-12   | 1.00     | 0.49           |
| 11   | 21.7.20  | 4027       | INSEMINATION 1 | 61.29            | 8.72E-12   | 0.97     | 0.50           |
| 12   | 27.7.20  | 4027       | INSEMINATION 1 | 59.87            | 8.75E-12   | 0.98     | 0.49           |
| 13   | 05.08.20 | 4027       | INSEMINATION 1 | 60.93            | 8.85E-12   | 0.97     | 0.50           |
| 14   | 12.08.20 | 4027       | INSEMINATION 1 |                  |            |          |                |
| 15   | 19.08.20 | 4027       | INSEMINATION 1 | 58.81            | 9.17E-12   | 0.97     | 0.50           |
| 16   | 26.08.20 | 4027       | INSEMINATION 2 |                  |            |          |                |
| 17   | 02.09.20 | 4027       | INSEMINATION 2 | 59.76            | 9.05E-12   | 0.98     | 0.49           |
| 18   | 09.09.20 | 4027       | INSEMINATION 2 | 58.64            | 8.93E-12   | 0.97     | 0.51           |
| 19   | 16.09.20 | 4027       | INSEMINATION 2 | 58.55            | 9.13E-12   | 0.99     | 0.52           |
| 20   |          |            | INSEMINATION 2 |                  |            |          |                |

|    |            |      |                |       |           |      |      |
|----|------------|------|----------------|-------|-----------|------|------|
| 21 | 1.10.20    | 4027 | INSEMINATION 2 | 57.03 | 8.75E-12  | 1.00 | 0.46 |
| 22 | 7.10.20    | 4027 | INSEMINATION 2 | 55.95 | 9.01E-12  | 1.00 | 0.46 |
| 23 | 14.10.20   | 4027 | INSEMINATION 2 | 58.35 | 8.81E-12  | 0.99 | 0.50 |
| 24 | 22.10.20   | 4027 | INSEMINATION 2 | 57.45 | 8.78E-12  | 0.99 | 0.47 |
| 25 | 28.10.20   | 4027 | INSEMINATION 2 | 57.58 | 8.93E-12  | 0.99 | 0.47 |
| 26 | 04.11.20   | 4027 | INSEMINATION 3 | 56.09 | 9.10E-12  | 1.00 | 0.47 |
| 27 | 11.11.2020 | 4027 | INSEMINATION 3 | 58.68 | 8.72E-12  | 0.98 | 0.45 |
| 28 | 26.11.2020 | 4027 | INSEMINATION 3 | 59.68 | 8.74E-12  | 1.00 | 0.42 |
| 29 | 3.12.2020  | 4027 | INSEMINATION 3 | 60.18 | 8.58E-112 | 1.00 | 0.41 |
| 30 | 09.12.2020 | 4027 | INSEMINATION 4 | 58.29 | 8.63E-12  | 0.98 | 0.47 |
| 31 | 16.12.2020 | 4027 | INSEMINATION 4 | 60.19 | 8.97E-12  | 0.97 | 0.44 |
| 32 | 23.12.2020 | 4027 | INSEMINATION 4 | 56.92 | 8.99E-12  | 0.98 | 0.42 |
| 33 | 30.12.2020 | 4027 | INSEMINATION 5 | 60.05 | 8.89E-12  | 0.98 | 0.45 |
| 34 | 06.1.2021  | 4027 | INSEMINATION 5 | 58.29 | 9.09E-12  | 0.98 | 0.45 |
| 35 | 13.1.2021  | 4027 | INSEMINATION 5 | 50.32 | 8.72E-12  | 0.98 | 0.37 |
| 36 | 27.1.2021  | 4027 | INSEMINATION 5 | 55.53 | 8.57E-12  | 0.98 | 0.39 |
| 37 | 04.02.2021 | 4027 | INSEMINATION 6 | 55.39 | 8.74E-12  | 0.98 | 0.42 |
| 38 | 11.02.2021 | 4027 | INSEMINATION 6 | 58.04 | 8.62E-12  | 0.98 | 0.42 |
| 39 | 17.02.2021 | 4027 | INSEMINATION 6 | 58.16 | 8.59E-12  | 0.98 | 0.44 |
| 40 | 23.02.2021 | 4027 | INSEMINATION 6 | 55.08 | 8.66E-12  | 0.98 | 0.40 |
| 41 | 04.03.2021 | 4027 | INSEMINATION 6 | 54.21 | 8.54E-12  | 0.98 | 0.41 |
| 42 | 11.03.2021 | 4027 | INSEMINATION 6 |       |           |      |      |
| 43 | 18.03.2021 | 4027 | INSEMINATION 6 | 48.38 | 8.8E-12   | 0.98 | 0.39 |
| 44 | 25.03.2021 | 4027 | INSEMINATION 6 | 56.40 | 8.72E-12  | 0.98 | 0.43 |
| 45 | 05.04.2021 | 4027 | INSEMINATION 6 | 53.68 | 8.92E-12  | 0.98 | 0.40 |
| 46 | 12.04.2021 | 4027 | INSEMINATION 6 | 55.23 | 8.80E-12  | 0.98 | 0.45 |
| 47 | 19.04.2021 | 4027 | INSEMINATION 7 | 53.95 | 9.00E-12  | 0.98 | 0.44 |



|    |            |      |                |       |          |      |      |
|----|------------|------|----------------|-------|----------|------|------|
| 48 | 26.04.2021 | 4027 | INSEMINATION 7 | 43.89 | 8.72E-12 | 0.98 | 0.35 |
| 49 | 05.05.2021 | 4027 | INSEMINATION 7 | 55.92 | 9.21E-12 | 0.98 | 0.43 |
| 50 | 19.05.2021 | 4027 | INSEMINATION 7 | 54.73 | 9.07E-12 | 0.98 | 0.41 |
| 51 | 26.05.2021 | 4027 | INSEMINATION 7 | 55.52 | 9.03E-12 | 0.98 | 0.43 |

**n = 2**

| week | DATE     | cow<br>number | STATE          | $\Delta\epsilon$ | $\tau$ (s) | $\alpha$ | $\sigma$ (S/m) |
|------|----------|---------------|----------------|------------------|------------|----------|----------------|
| 1    | 13.5.20  | 4032          | NON-PREGNANT   | 56.95            | 8.48E-12   | 0.98     | 0.41           |
| 2    | 20.5.20  | 4032          | NON-PREGNANT   | 56.00            | 8.82E-12   | 1.00     | 0.39           |
| 3    | 27.5.20  | 4032          | NON-PREGNANT   | 55.73            | 8.69E-12   | 1.00     | 0.30           |
| 4    | 3.6.20   | 4032          | NON-PREGNANT   | 57.82            | 8.82E-12   | 0.99     | 0.41           |
| 5    | 10.6.20  | 4032          | NON-PREGNANT   | 58.91            | 9.18E-12   | 0.97     | 0.44           |
| 6    | 17.6.20  | 4032          | NON-PREGNANT   | 59.60            | 9.03E-12   | 0.99     | 0.42           |
| 7    | 24.6.20  | 4032          | INSEMINATION 1 | 59.27            | 8.74E-12   | 0.98     | 0.41           |
| 8    | 1.7.20   | 4032          | INSEMINATION 1 | 56.75            | 9.03E-12   | 1.00     | 0.44           |
| 9    |          |               | INSEMINATION 1 |                  |            |          |                |
| 10   | 15.7.20  | 4032          | INSEMINATION 1 | 57.08            | 9.25E-12   | 1.00     | 0.45           |
| 11   | 21.7.20  | 4032          | INSEMINATION 1 | 59.56            | 8.76E-12   | 0.98     | 0.44           |
| 12   | 27.7.20  | 4032          | INSEMINATION 1 | 58.45            | 9.18E-12   | 0.99     | 0.46           |
| 13   | 05.08.20 | 4032          | INSEMINATION 1 | 59.36            | 8.93E-12   | 0.97     | 0.44           |
| 14   | 12.08.20 | 4032          | INSEMINATION 1 | 58.62            | 9.11E-12   | 0.98     | 0.45           |
| 15   | 19.08.20 | 4032          | INSEMINATION 1 | 57.77            | 9.35E-12   | 0.97     | 0.44           |
| 16   | 26.08.20 | 4032          | INSEMINATION 2 |                  |            |          |                |
| 17   | 02.09.20 | 4032          | INSEMINATION 2 | 57.07            | 9.06E-12   | 0.99     | 0.42           |
| 18   | 09.09.20 | 4032          | INSEMINATION 2 | 56.33            | 8.97E-12   | 0.98     | 0.43           |

|    |            |      |                |       |          |      |      |
|----|------------|------|----------------|-------|----------|------|------|
| 19 | 16.09.20   | 4032 | INSEMINATION 2 | 57.44 | 9.20E-12 | 0.99 | 0.44 |
| 20 |            |      | INSEMINATION 2 |       |          |      |      |
| 21 | 1.10.20    | 4032 | INSEMINATION 2 | 56.59 | 8.75E-12 | 1.00 | 0.40 |
| 22 | 7.10.20    | 4032 | INSEMINATION 2 | 56.59 | 9.02E-12 | 0.99 | 0.42 |
| 23 | 14.10.20   | 4032 | INSEMINATION 2 | 57.19 | 8.88E-12 | 0.99 | 0.41 |
| 24 | 22.10.20   | 4032 | INSEMINATION 2 | 57.15 | 8.85E-12 | 0.99 | 0.41 |
| 25 | 28.10.20   | 4032 | INSEMINATION 2 | 56.40 | 8.97E-12 | 1.00 | 0.41 |
| 26 | 04.11.20   | 4032 | INSEMINATION 3 | 55.36 | 9.17E-12 | 1.00 | 0.40 |
| 27 | 11.11.2020 | 4032 | INSEMINATION 3 | 57.97 | 8.69E-12 | 0.98 | 0.38 |
| 28 | 26.11.2020 | 4032 | INSEMINATION 3 | 59.35 | 8.74E-12 | 1.00 | 0.36 |
| 29 | 3.12.2020  | 4032 | INSEMINATION 3 | 58.58 | 8.49E-12 | 1.00 | 0.37 |
| 30 | 09.12.2020 | 4032 | INSEMINATION 4 | 59.61 | 8.73E-12 | 0.98 | 0.41 |
| 31 | 16.12.2020 | 4032 | INSEMINATION 4 | 54.19 | 8.96E-12 | 0.98 | 0.35 |
| 32 | 23.12.2020 | 4032 | INSEMINATION 4 | 60.55 | 8.83E-12 | 0.96 | 0.34 |
| 33 | 30.12.2021 | 4032 | INSEMINATION 5 | 54.93 | 8.93E-12 | 0.98 | 0.36 |
| 34 | 06.1.2021  | 4032 | INSEMINATION 5 | 55.36 | 9.00E-12 | 0.99 | 0.36 |
| 35 | 13.1.2021  | 4032 | INSEMINATION 5 | 55.66 | 8.73E-12 | 0.98 | 0.37 |
| 36 | 27.1.2021  | 4032 | INSEMINATION 5 | 57.09 | 8.64E-12 | 0.98 | 0.36 |
| 37 | 04.02.2021 | 4032 | INSEMINATION 6 | 56.72 | 8.89E-12 | 0.98 | 0.38 |
| 38 | 11.02.2021 | 4032 | INSEMINATION 6 | 53.24 | 8.60E-12 | 0.98 | 0.36 |
| 39 | 17.02.2021 | 4032 | INSEMINATION 6 | 56.64 | 8.69E-12 | 0.98 | 0.37 |
| 40 | 23.02.2021 | 4032 | INSEMINATION 6 | 56.62 | 8.65E-12 | 0.98 | 0.37 |
| 41 | 04.03.2021 | 4032 | INSEMINATION 6 | 57.48 | 8.65E-12 | 0.98 | 0.39 |
| 42 | 11.03.2021 | 4032 | INSEMINATION 6 |       |          |      |      |
| 43 | 18.03.2021 | 4032 | INSEMINATION 6 | 51.76 | 8.81E-12 | 0.98 | 0.38 |
| 44 | 25.03.2021 | 4032 | INSEMINATION 6 | 57.84 | 8.75E-12 | 0.98 | 0.41 |
| 45 | 05.04.2021 | 4032 | INSEMINATION 6 | 57.26 | 8.89E-12 | 0.98 | 0.37 |

|    |            |      |                |       |          |      |      |
|----|------------|------|----------------|-------|----------|------|------|
| 46 | 12.04.2021 | 4032 | INSEMINATION 6 |       |          |      |      |
| 47 | 19.04.2021 | 4032 | INSEMINATION 7 | 52.09 | 9.19E-12 | 0.98 | 0.35 |
| 48 | 26.04.2021 | 4032 | INSEMINATION 7 | 47.99 | 8.84E-12 | 0.98 | 0.33 |
| 49 | 05.05.2021 | 4032 | INSEMINATION 7 | 57.10 | 9.19E-12 | 0.97 | 0.40 |
| 50 | 19.05.2021 | 4032 | INSEMINATION 7 | 58.06 | 9.05E-12 | 0.98 | 0.40 |
| 51 | 26.05.2021 | 4032 | INSEMINATION 7 | 56.29 | 9.09E-12 | 0.98 | 0.38 |

**n = 3**

| week | DATE       | cow number | STATE          | $\Delta\epsilon$ | $\tau$ (s) | $\alpha$ | $\sigma$ (S/m) |
|------|------------|------------|----------------|------------------|------------|----------|----------------|
| 1    | 26.11.2020 | 3802       | NON-PREGNANT   | 52.16            | 8.50E-12   | 1.00     | 0.38           |
| 2    | 03.12.2020 | 3802       | NON-PREGNANT   | 56.30            | 8.3E-12    | 1.00     | 0.36           |
| 3    | 09.12.2020 | 3802       | NON-PREGNANT   | 60.81            | 8.52E-12   | 0.98     | 0.44           |
| 4    | 16.12.2020 | 3802       | NON-PREGNANT   | 58.67            | 8.96E-12   | 0.98     | 0.41           |
| 5    | 23.12.2020 | 3802       | NON-PREGNANT   | 63.78            | 9.23E-12   | 0.98     | 0.44           |
| 6    | 30.12.2020 | 3802       | INSEMINATION 1 | 52.64            | 8.68E-12   | 0.98     | 0.39           |
| 7    | 06.1.2021  | 3802       | INSEMINATION 1 | 59.98            | 9.01E-12   | 0.99     | 0.44           |
| 8    | 13.1.2021  | 3802       | INSEMINATION 1 | 60.15            | 8.71E-12   | 0.98     | 0.44           |
| 9    | 27.1.2021  | 3802       | INSEMINATION 2 | 57.75            | 8.54E-12   | 0.98     | 0.42           |
| 10   | 04.02.2021 | 3802       | INSEMINATION 2 | 56.10            | 8.9E-12    | 0.98     | 0.43           |
| 11   | 11.02.2021 | 3802       | INSEMINATION 2 | 49.71            | 8.52E-12   | 0.98     | 0.34           |
| 12   | 17.02.2021 | 3802       | INSEMINATION 2 | 56.76            | 8.45E-12   | 0.98     | 0.48           |
| 13   | 23.02.2021 | 3802       | INSEMINATION 2 | 58.86            | 8.53E-12   | 0.98     | 0.42           |
| 14   | 04.03.2021 | 3802       | INSEMINATION 3 | 58.18            | 8.62E-12   | 0.98     | 0.44           |
| 15   | 11.03.2021 | 3802       | INSEMINATION 3 |                  |            |          |                |
| 16   | 18.03.2021 | 3802       | INSEMINATION 3 | 52.76            | 8.88E-12   | 0.98     | 0.42           |

|    |            |      |                |       |          |      |      |
|----|------------|------|----------------|-------|----------|------|------|
| 17 | 25.03.2021 | 3802 | INSEMINATION 3 | 60.17 | 8.70E-12 | 0.98 | 0.47 |
| 18 | 05.04.2021 | 3802 | INSEMINATION 4 | 60.09 | 8.63E-12 | 0.98 | 0.46 |
| 19 | 12.04.2021 | 3802 | INSEMINATION 4 | 57.38 | 8.76E-12 | 0.98 | 0.42 |
| 20 | 19.04.2021 | 3802 | INSEMINATION 5 | 55.00 | 9.06E-12 | 0.98 | 0.45 |
| 21 | 26.04.2021 | 3802 | INSEMINATION 5 | 49.30 | 8.67E-12 | 0.98 | 0.38 |
| 22 | 05.05.2021 | 3802 | INSEMINATION 5 | 57.76 | 9.31E-12 | 0.98 | 0.47 |
| 23 | 19.05.2021 | 3802 | INSEMINATION 6 | 60.53 | 9.01E-12 | 0.98 | 0.45 |
| 24 | 26.05.2021 | 3802 | INSEMINATION 6 | 55.02 | 8.93E-12 | 0.98 | 0.44 |

**n = 4**

| week | DATE       | cow number | STATE          | $\Delta\epsilon$ | $\tau$ (s) | $\alpha$ | $\sigma$ (S/m) |
|------|------------|------------|----------------|------------------|------------|----------|----------------|
| 1    | 23.12.2020 | 3971       | NON-PREGNANT   | 61.12            | 8.79E-12   | 0.97     | 0.42           |
| 2    | 06.1.2021  | 3971       | NON-PREGNANT   | 58.10            | 9.02E-12   | 0.99     | 0.44           |
| 3    | 13.1.2021  | 3971       | NON-PREGNANT   | 58.59            | 8.84E-12   | 0.98     | 0.43           |
| 4    | 27.1.2021  | 3971       | NON-PREGNANT   | 55.64            | 8.50E-12   | 0.98     | 0.40           |
| 5    | 04.02.2021 | 3971       | NON-PREGNANT   | 59.59            | 8.80E-12   | 0.98     | 0.45           |
| 6    | 11.02.2021 | 3971       | NON-PREGNANT   | 60.96            | 8.63E-12   | 0.98     | 0.46           |
| 7    | 17.02.2021 | 3971       | NON-PREGNANT   | 58.39            | 8.56E-12   | 0.98     | 0.43           |
| 8    | 23.02.2021 | 3971       | NON-PREGNANT   | 59.39            | 8.53E-12   | 0.98     | 0.43           |
| 9    | 04.03.2021 | 3971       | INSEMINATION 1 | 59.41            | 8.61E-12   | 0.98     | 0.45           |
| 10   | 11.03.2021 | 3971       | INSEMINATION 1 |                  |            |          |                |
| 11   | 18.03.2021 | 3971       | INSEMINATION 1 | 59.14            | 8.86E-12   | 0.98     | 0.44           |
| 12   | 25.03.2021 | 3971       | INSEMINATION 1 | 60.05            | 9.01E-12   | 0.98     | 0.44           |
| 13   | 05.04.2021 | 3971       | INSEMINATION 2 | 57.36            | 8.79E-12   | 0.98     | 0.41           |
| 14   | 12.04.2021 | 3971       | INSEMINATION 2 | 59.34            | 8.77E-12   | 0.98     | 0.40           |

|    |            |      |                |       |          |      |      |
|----|------------|------|----------------|-------|----------|------|------|
| 15 | 19.04.2021 | 3971 | INSEMINATION 2 | 57.43 | 9.08E-12 | 0.98 | 0.44 |
| 16 | 26.04.2021 | 3971 | INSEMINATION 2 | 48.06 | 8.65E-12 | 0.98 | 0.37 |
| 17 | 05.05.2021 | 3971 | INSEMINATION 2 | 57.74 | 8.95E-12 | 0.98 | 0.42 |
| 18 | 19.05.2021 | 3971 | INSEMINATION 2 | 59.88 | 9.04E-12 | 0.98 | 0.44 |
| 19 | 26.05.2021 | 3971 | INSEMINATION 3 | 57.74 | 8.95E-12 | 0.98 | 0.42 |

**n= 5**

| <b>week</b> | <b>DATE</b> | <b>cow<br/>number</b> | <b>STATE</b>   | <b><math>\Delta\epsilon</math></b> | <b><math>\tau</math> (s)</b> | <b><math>\alpha</math></b> | <b><math>\sigma</math>(S/m)</b> |
|-------------|-------------|-----------------------|----------------|------------------------------------|------------------------------|----------------------------|---------------------------------|
| 1           | 04.02.2021  | 3915                  | NON-PREGNANT   | 57.41                              | 8.79E-12                     | 0.99                       | 0.47                            |
| 2           | 11.02.2021  | 3915                  | NON-PREGNANT   | 58.74                              | 8.50E-12                     | 0.98                       | 0.49                            |
| 3           | 17.02.2021  | 3915                  | NON-PREGNANT   | 58.68                              | 8.42E-12                     | 0.98                       | 0.47                            |
| 4           | 23.02.2021  | 3915                  | NON-PREGNANT   | 60.11                              | 8.43E-12                     | 0.98                       | 0.49                            |
| 5           | 04.03.2021  | 3915                  | INSEMINATION 1 | 58.44                              | 8.52E-12                     | 0.98                       | 0.49                            |
| 6           | 11.03.2021  | 3915                  | INSEMINATION 1 |                                    |                              |                            |                                 |
| 7           | 18.03.2021  | 3915                  | INSEMINATION 1 | 57.19                              | 8.82E-12                     | 0.98                       | 0.50                            |
| 8           | 25.03.2021  | 3915                  | INSEMINATION 1 | 58.55                              | 8.94E-12                     | 0.98                       | 0.48                            |
| 9           | 05.04.2021  | 3915                  | INSEMINATION 1 | 60.34                              | 8.80E-12                     | 0.98                       | 0.49                            |
| 10          | 12.04.2021  | 3915                  | INSEMINATION 1 |                                    |                              |                            |                                 |
| 11          | 19.04.2021  | 3915                  | INSEMINATION 1 | 60.32                              | 9.13E-12                     | 0.98                       | 0.52                            |
| 12          | 26.04.2021  | 3915                  | INSEMINATION 1 | 51.32                              | 8.67E-12                     | 0.98                       | 0.40                            |
| 13          | 05.05.2021  | 3915                  | INSEMINATION 2 | 57.14                              | 9.34E-12                     | 0.98                       | 0.47                            |
| 14          | 19.05.2021  | 3915                  | INSEMINATION 2 | 61.62                              | 9.00E-12                     | 0.98                       | 0.49                            |
| 15          | 26.05.2021  | 3915                  | INSEMINATION 2 | 59.25                              | 8.97E-12                     | 0.98                       | 0.45                            |

**n = 6**

| week | DATE       | cow number | STATE          | $\Delta\epsilon$ | $\tau$ (s) | $\alpha$ | $\sigma$ (S/m) |
|------|------------|------------|----------------|------------------|------------|----------|----------------|
| 1    | 18.03.2021 | 3991       | NON-PREGNANT   | 49.27            | 8.88E-12   | 0.98     | 0.39           |
| 2    | 25.03.2021 | 3991       | NON-PREGNANT   | 61.05            | 8.92E-12   | 0.98     | 0.46           |
| 3    | 05.04.2021 | 3991       | NON-PREGNANT   | 58.42            | 8.73E-12   | 0.98     | 0.42           |
| 4    | 12.04.2021 | 3991       | NON-PREGNANT   | 60.13            | 8.78E-12   | 0.98     | 0.42           |
| 5    | 19.04.2021 | 3991       | NON-PREGNANT   | 58.86            | 9.13E-12   | 0.97     | 0.44           |
| 6    | 26.04.2021 | 3991       | INSEMINATION 1 | 49.52            | 8.75E-12   | 0.98     | 0.35           |
| 7    | 05.05.2021 | 3991       | INSEMINATION 1 | 57.63            | 9.56E-12   | 0.98     | 0.43           |
| 8    | 19.05.2021 | 3991       | INSEMINATION 1 | 61.54            | 9.03E-12   | 0.98     | 0.45           |
| 9    | 26.05.2021 | 3991       | INSEMINATION 2 | 57.63            | 8.89E-12   | 0.98     | 0.42           |

**n = 7**

| week | DATE       | cow number | STATE          | $\Delta\epsilon$ | $\tau$ (s) | $\alpha$ | $\sigma$ (S/m) |
|------|------------|------------|----------------|------------------|------------|----------|----------------|
| 1    | 18.03.2021 | 3986       | NON-PREGNANT   | 59.48            | 8.88E-12   | 0.98     | 0.49           |
| 2    | 25.03.2021 | 3986       | INSEMINATION 1 | 57.90            | 8.84E-12   | 0.98     | 0.45           |
| 3    | 05.04.2021 | 3986       | INSEMINATION 1 | 60.94            | 8.79E-12   | 0.98     | 0.47           |
| 4    | 12.04.2021 | 3986       | INSEMINATION 2 | 59.52            | 8.69E-12   | 0.98     | 0.44           |
| 5    | 19.04.2021 | 3986       | INSEMINATION 2 | 59.10            | 9.09E-12   | 0.98     | 0.49           |
| 6    | 26.04.2021 | 3986       | INSEMINATION 2 | 50.69            | 8.81E-12   | 0.98     | 0.41           |
| 7    | 05.05.2021 | 3986       | INSEMINATION 3 | 59.69            | 9.52E-12   | 0.98     | 0.50           |
| 8    | 19.05.2021 | 3986       | INSEMINATION 3 | 53.28            | 8.98E-12   | 0.98     | 0.43           |
| 9    | 26.05.2021 | 3986       | INSEMINATION 3 | 62.25            | 8.96E-12   | 0.98     | 0.50           |

**n = 8**

| week | DATE       | cow<br>number | STATE                    | $\Delta\epsilon$ | $\tau$ (s) | $\alpha$ | $\sigma$ (S/m) |
|------|------------|---------------|--------------------------|------------------|------------|----------|----------------|
| 1    | 24.6.20    | 3871          | NON- PREGNANT            | 58.33            | 8.73E-12   | 0.99     | 0.46           |
| 2    | 1.7.20     | 3871          | NON- PREGNANT            | 60.77            | 8.68E-12   | 0.98     | 0.46           |
| 3    |            |               | NON- PREGNANT            |                  |            |          |                |
| 4    | 15.7.20    | 3871          | NON- PREGNANT            | 59.43            | 9.16E-12   | 1.00     | 0.51           |
| 5    | 21.7.20    | 3871          | INSEMINATION 1           | 58.65            | 8.78E-12   | 0.98     | 0.46           |
| 6    | 27.7.20    | 3871          | INSEMINATION 1           | 61.49            | 9.05E-12   | 0.98     | 0.51           |
| 7    | 05.08.20   | 3871          | INSEMINATION 1           | 59.36            | 8.94E-12   | 0.98     | 0.49           |
| 8    | 12.08.20   | 3871          | INSEMINATION 1           | 59.66            | 9.09E-12   | 0.99     | 0.50           |
| 9    | 19.08.20   | 3871          | INSEMINATION 1           | 56.94            | 9.38E-12   | 0.97     | 0.52           |
| 10   | 26.08.20   | 3871          | INSEMINATION 1           |                  |            |          |                |
| 11   | 02.09.20   | 3871          | INSEMINATION 1           | 58.45            | 8.96E-12   | 0.98     | 0.47           |
| 12   | 09.09.20   | 3871          | INSEMINATION 1           | 59.55            | 8.97E-12   | 0.98     | 0.50           |
| 13   | 16.09.20   | 3871          | INSEMINATION 2           | 59.39            | 9.1E-12    | 0.99     | 0.50           |
| 14   |            |               | INSEMINATION 2           |                  |            |          |                |
| 15   | 1.10.20    | 3871          | INSEMINATION 2           | 57.41            | 8.77E-12   | 1.00     | 0.46           |
| 16   | 7.10.20    | 3871          | INSEMINATION 2           | 56.02            | 8.82E-12   | 0.99     | 0.49           |
| 17   | 14.10.20   | 3871          | INSEMINATION 2           | 57.25            | 8.81E-12   | 0.99     | 0.46           |
| 18   | 22.10.20   | 3871          | INSEMINATION 2           | 56.64            | 8.83E-12   | 0.99     | 0.46           |
| 19   | 28.10.20   | 3871          | INSEMINATION 2           | 58.07            | 8.96E-12   | 0.99     | 0.50           |
| 20   | 4.11.20    | 3871          | INSEMINATION 3/ PREGNANT | 57.77            | 8.95E-12   | 1.00     | 0.45           |
| 21   | 11.11.2020 | 3871          | INSEMINATION 3/ PREGNANT | 59.66            | 8.7E-12    | 0.98     | 0.43           |
| 22   | 26.11.2020 | 3871          | INSEMINATION 3/ PREGNANT | 61.95            | 8.69E-12   | 1.00     | 0.53           |

|    |            |      |                          |       |          |      |      |
|----|------------|------|--------------------------|-------|----------|------|------|
| 23 | 03.12.2020 | 3871 | INSEMINATION 3/ PREGNANT | 58.69 | 8.49E-12 | 1.00 | 0.48 |
| 24 | 09.12.2020 | 3871 | INSEMINATION 3/ PREGNANT | 58.18 | 8.68E-12 | 0.99 | 0.49 |
| 25 | 16.12.2020 | 3871 | INSEMINATION 3/ PREGNANT | 55.22 | 8.85E-12 | 0.98 | 0.41 |

**n = 9**

| week | DATE     | cow number | STATE          | $\Delta\epsilon$ | $\tau$ (s) | $\alpha$ | $\sigma$ (S/m) |
|------|----------|------------|----------------|------------------|------------|----------|----------------|
| 1    | 24.6.20  | 3943       | NON-PREGNANT   | 59.55            | 8.80E-12   | 0.99     | 0.48           |
| 2    | 1.7.20   | 3943       | NON-PREGNANT   | 59.92            | 8.82E-12   | 0.99     | 0.48           |
| 3    |          |            | NON-PREGNANT   |                  |            |          |                |
| 4    | 15.7.20  | 3943       | INSEMINATION 1 | 57.96            | 9.22E-12   | 1.00     | 0.48           |
| 5    | 21.7.20  | 3943       | INSEMINATION 1 | 59.45            | 8.78E-12   | 0.99     | 0.51           |
| 6    | 27.7.20  | 3943       | INSEMINATION 1 | 59.35            | 9.14E-12   | 0.98     | 0.51           |
| 7    | 05.08.20 | 3943       | INSEMINATION 2 | 58.74            | 9.00E-12   | 0.98     | 0.47           |
| 8    | 12.08.20 | 3943       | INSEMINATION 2 | 58.50            | 9.06E-12   | 0.99     | 0.51           |
| 9    | 19.08.20 | 3943       | INSEMINATION 2 | 58.28            | 9.09E-12   | 0.97     | 0.51           |
| 10   | 26.08.20 | 3943       | INSEMINATION 2 |                  |            |          |                |
| 11   | 02.09.20 | 3943       | INSEMINATION 2 | 59.73            | 9.03E-12   | 0.98     | 0.47           |
| 12   | 09.09.20 | 3943       | INSEMINATION 3 | 58.65            | 8.90E-12   | 0.98     | 0.50           |
| 13   | 16.09.20 | 3943       | INSEMINATION 3 | 58.72            | 9.07E-12   | 0.98     | 0.49           |
| 14   |          |            | INSEMINATION 3 |                  |            |          |                |
| 15   | 1.10.20  | 3943       | INSEMINATION 4 | 57.59            | 8.76E-12   | 1.00     | 0.44           |
| 16   | 7.10.20  | 3943       | INSEMINATION 4 | 56.81            | 8.93E-12   | 0.99     | 0.47           |
| 17   | 14.10.20 | 3943       | INSEMINATION 4 | 57.70            | 8.82E-12   | 0.99     | 0.47           |
| 18   | 22.10.20 | 3943       | INSEMINATION 4 | 56.88            | 8.89E-12   | 0.99     | 0.47           |
| 19   | 28.10.20 | 3943       | INSEMINATION 4 | 58.04            | 8.95E-12   | 0.99     | 0.47           |



|    |            |      |                         |       |          |      |      |
|----|------------|------|-------------------------|-------|----------|------|------|
| 20 | 4.11.20    | 3943 | INSEMINATION 4          | 56.35 | 8.98E-12 | 1.00 | 0.47 |
| 21 | 11.11.2020 | 3943 | INSEMINATION 4          | 59.26 | 8.69E-12 | 0.98 | 0.45 |
| 22 | 26.11.2020 | 3943 | INSEMINATION 4          | 63.67 | 8.71E-12 | 0.99 | 0.47 |
| 23 | 3.12.2020  | 3943 | INSEMINATION 5          | 57.62 | 8.45E-12 | 1.00 | 0.43 |
| 24 | 09.12.2020 | 3943 | INSEMINATION 5          | 57.86 | 8.61E-12 | 0.98 | 0.47 |
| 25 | 16.12.2020 | 3943 | INSEMINATION 5          | 58.50 | 8.93E-12 | 0.98 | 0.44 |
| 26 | 23.12.2020 | 3943 | INSEMINATION 6/PREGNANT | 57.25 | 8.85E-12 | 0.98 | 0.43 |
| 27 | 30.12.2020 | 3943 | INSEMINATION 6/PREGNANT | 54.03 | 8.60E-12 | 0.98 | 0.43 |
| 28 | 06.1.2021  | 3943 | INSEMINATION 6/PREGNANT |       |          |      |      |
| 29 | 13.1.2021  | 3943 | INSEMINATION 6/PREGNANT | 54.09 | 8.65E-12 | 0.98 | 0.44 |
| 30 | 27.1.2021  | 3943 | INSEMINATION 6/PREGNANT | 55.21 | 8.62E-12 | 0.99 | 0.40 |
| 31 | 04.02.2021 | 3943 | INSEMINATION 6/PREGNANT | 55.64 | 8.76E-12 | 0.98 | 0.43 |

**n = 10**

| week | DATE       | cow number | STATE          | $\Delta\varepsilon$ | $\tau$ (s) | $\alpha$ | $\sigma$ (S/m) |
|------|------------|------------|----------------|---------------------|------------|----------|----------------|
| 1    | 26.11.2020 | 3509       | NON-PREGNANT   | 60.41               | 8.71E-12   | 1.00     | 0.44           |
| 2    | 03.12.2020 | 3509       | NON-PREGNANT   | 60.29               | 8.58E-12   | 1.00     | 0.42           |
| 3    | 09.12.2020 | 3509       | NON-PREGNANT   | 59.20               | 8.63E-12   | 0.98     | 0.50           |
| 4    | 16.12.2020 | 3509       | NON-PREGNANT   | 64.01               | 8.82E-12   | 0.97     | 0.48           |
| 5    | 23.12.2020 | 3509       | INSEMINATION 1 | 59.26               | 8.83E-12   | 0.98     | 0.46           |
| 6    | 06.1.2021  | 3509       | INSEMINATION 1 | 59.59               | 9.01E-12   | 0.98     | 0.48           |
| 7    | 13.1.2021  | 3509       | INSEMINATION 1 | 61.06               | 8.66E-12   | 0.98     | 0.48           |
| 8    | 27.1.2021  | 3509       | INSEMINATION 1 | 53.40               | 8.43E-12   | 0.98     | 0.38           |

|    |            |      |                         |       |          |      |      |
|----|------------|------|-------------------------|-------|----------|------|------|
| 9  | 04.02.2021 | 3509 | INSEMINATION 2/PREGNANT | 56.20 | 8.80E-12 | 0.98 | 0.43 |
| 10 | 11.02.2021 | 3509 | INSEMINATION 2/PREGNANT | 60.95 | 8.61E-12 | 0.98 | 0.48 |
| 11 | 17.02.2021 | 3509 | INSEMINATION 2/PREGNANT | 58.98 | 8.56E-12 | 0.98 | 0.44 |
| 12 | 23.02.2021 | 3509 | INSEMINATION 2/PREGNANT | 57.99 | 8.62E-12 | 0.98 | 0.45 |
| 13 | 04.03.2021 | 3509 | INSEMINATION 2/PREGNANT | 59.43 | 8.55E-12 | 0.98 | 0.46 |
| 14 | 11.03.2021 | 3509 | INSEMINATION 2/PREGNANT |       |          |      |      |
| 15 | 18.03.2021 | 3509 | INSEMINATION 2/PREGNANT | 55.92 | 8.74E-12 | 0.98 | 0.45 |
| 16 | 25.03.2021 | 3509 | INSEMINATION 2/PREGNANT | 59.63 | 8.76E-12 | 0.98 | 0.45 |

**n = 11**

| week | DATE       | cow number | STATE                   | $\Delta\epsilon$ | $\tau$ (s) | $\alpha$ | $\sigma$ (S/m) |
|------|------------|------------|-------------------------|------------------|------------|----------|----------------|
| 1    | 26.11.2020 | 4082       | NON-PREGNANT            | 60.33            | 8.73E-12   | 1.00     | 0.40           |
| 2    | 03.12.2020 | 4082       | NON-PREGNANT            | 58.01            | 8.59E-12   | 1.00     | 0.39           |
| 3    | 09.12.2020 | 4082       | NON-PREGNANT            | 60.24            | 8.61E-12   | 0.98     | 0.45           |
| 4    | 16.12.2020 | 4082       | NON-PREGNANT            | 60.06            | 8.96E-12   | 0.98     | 0.43           |
| 5    | 23.12.2020 | 4082       | NON-PREGNANT            | 56.98            | 8.89E-12   | 0.98     | 0.46           |
| 6    | 06.1.2021  | 4082       | NON-PREGNANT            | 58.99            | 8.96E-12   | 0.98     | 0.45           |
| 7    | 13.1.2021  | 4082       | INSEMINATION 1/PREGNANT | 52.74            | 8.63E-12   | 0.99     | 0.41           |
| 8    | 27.1.2021  | 4082       | INSEMINATION 1/PREGNANT | 55.92            | 8.62E-12   | 0.98     | 0.41           |
| 9    | 04.02.2021 | 4082       | INSEMINATION 1/PREGNANT |                  |            |          |                |
| 10   | 11.02.2021 | 4082       | INSEMINATION 1/PREGNANT | 59.08            | 8.62E-12   | 0.98     | 0.45           |
| 11   | 17.02.2021 | 4082       | INSEMINATION 1/PREGNANT | 58.67            | 8.60E-12   | 0.98     | 0.45           |
| 12   | 23.02.2021 | 4082       | INSEMINATION 1/PREGNANT | 59.77            | 8.50E-12   | 0.98     | 0.44           |
| 13   | 04.03.2021 | 4082       | INSEMINATION 1/PREGNANT | 56.42            | 8.51E-12   | 0.98     | 0.42           |

n = 12

| week | DATE       | cow<br>number | STATE                   | $\Delta\varepsilon$ | $\tau$ (s) | $\alpha$ | $\sigma$ (S/m) |
|------|------------|---------------|-------------------------|---------------------|------------|----------|----------------|
| 1    | 26.11.2020 | 3729          | NON- PREGNANT           | 62.38               | 8.72E-12   | 1.00     | 0.48           |
| 2    | 03.12.2020 | 3729          | NON- PREGNANT           | 61.04               | 8.61E-12   | 1.00     | 0.43           |
| 3    | 09.12.2020 | 3729          | NON- PREGNANT           | 57.21               | 8.82E-12   | 0.99     | 0.49           |
| 4    | 16.12.2020 | 3729          | NON- PREGNANT           | 61.57               | 8.89E-12   | 0.98     | 0.50           |
| 5    | 23.12.2020 | 3729          | NON- PREGNANT           |                     |            |          |                |
| 6    | 06.1.2021  | 3729          | INSEMINATION 1          | 59.31               | 8.86E-12   | 1.00     | 0.50           |
| 7    | 13.1.2021  | 3729          | INSEMINATION 1          | 52.75               | 8.66E-12   | 1.00     | 0.43           |
| 8    | 27.1.2021  | 3729          | INSEMINATION 2          | 61.90               | 8.51E-12   | 0.98     | 0.48           |
| 9    | 04.02.2021 | 3729          | INSEMINATION 2          | 61.53               | 8.87E-12   | 0.98     | 0.52           |
| 10   | 11.02.2021 | 3729          | INSEMINATION 3          | 56.34               | 8.50E-12   | 0.98     | 0.46           |
| 11   | 17.02.2021 | 3729          | INSEMINATION 3          | 57.69               | 8.49E-12   | 0.98     | 0.41           |
| 12   | 23.02.2021 | 3729          | INSEMINATION 4          | 60.58               | 8.53E-12   | 0.98     | 0.51           |
| 13   | 04.03.2021 | 3729          | INSEMINATION 4          | 57.85               | 8.49E-12   | 0.98     | 0.49           |
| 14   | 11.03.2021 | 3729          | INSEMINATION 4          |                     |            |          |                |
| 15   | 18.03.2021 | 3729          | INSEMINATION 5/PREGNANT | 59.17               | 8.81E-12   | 0.97     | 0.47           |
| 16   | 25.03.2021 | 3729          | INSEMINATION 5/PREGNANT | 61.14               | 8.71E-12   | 0.98     | 0.52           |
| 17   | 05.04.2021 | 3729          | INSEMINATION 5/PREGNANT | 60.39               | 8.67E-12   | 0.98     | 0.46           |
| 18   | 12.04.2021 | 3729          | INSEMINATION 5/PREGNANT | 58.76               | 8.72E-12   | 0.98     | 0.47           |
| 19   | 19.04.2021 | 3729          | INSEMINATION 5/PREGNANT | 52.60               | 8.97E-12   | 0.98     | 0.46           |
| 20   | 26.04.2021 | 3729          | INSEMINATION 5/PREGNANT | 47.95               | 8.75E-12   | 0.98     | 0.41           |

**SUPPORTING INFORMATION 2: Physiological and Microwave Dielectric fitting parameters measured daily for individual tracked cows among three different reproductive states: Non-Pregnant, insemination, and pregnancy.**

**Table S2A:** Physiological parameters (fat %, density %, lactose%, solid non-fat (SNF%), and protein% ) as well as weather temperature on the day of sample collection measured daily for n=10 different cows at different reproductive states (Non-pregnant-NP, Inseminations and during confirmed pregnancy). The not measured days correspond mostly to Saturdays, an official holiday in Israel.

**n = 1**

| <b>Day</b> | <b>cow number</b> | <b>state</b>                | <b>weather temperature (Celsius)</b> | <b>FAT%</b> | <b>Density%</b> | <b>Lactose%</b> | <b>SNF%</b> | <b>Protein%</b> |
|------------|-------------------|-----------------------------|--------------------------------------|-------------|-----------------|-----------------|-------------|-----------------|
| 1          | 4165              | NON-PREGNANT                | 11                                   | 3.54        | 28.64           | 4.42            | 8.06        | 3.25            |
| 2          | 4165              | NON-PREGNANT                | 11                                   | 2.15        | 30.46           | 4.53            | 8.24        | 3.31            |
| 3          | 4165              | NON-PREGNANT                | 10                                   | 1.88        | 30.48           | 4.5             | 8.18        | 3.3             |
| 4          | 4165              | NON-PREGNANT                | 11                                   | 2.8         | 29.7            | 4.49            | 8.17        | 3.29            |
| 5          | 4165              | NON-PREGNANT                | 9                                    | 2.32        | 30.55           | 4.56            | 8.29        | 3.34            |
| 6          | 4165              | FIRST INSEMINATION/PREGNANT | 8                                    | 2.65        | 30.43           | 4.57            | 8.33        | 3.35            |
| 7          | 4165              | FIRST INSEMINATION/PREGNANT |                                      |             |                 |                 |             |                 |
| 8          | 4165              | FIRST INSEMINATION/PREGNANT | 9                                    | 2.1         | 30.21           | 4.48            | 8.16        | 3.29            |
| 9          | 4165              | FIRST INSEMINATION/PREGNANT |                                      |             |                 |                 |             |                 |
| 10         | 4165              | FIRST INSEMINATION/PREGNANT | 8                                    | 2.11        | 31.24           | 4.63            | 8.43        | 3.38            |
| 11         | 4165              | FIRST INSEMINATION/PREGNANT | 7                                    | 2.16        | 30.57           | 4.54            | 8.27        | 3.33            |
| 12         | 4165              | FIRST INSEMINATION/PREGNANT | 10                                   | 1.78        | 31.97           | 4.7             | 8.55        | 3.43            |
| 13         | 4165              | FIRST INSEMINATION/PREGNANT | 10                                   | 1.57        | 31.87           | 4.66            | 8.48        | 3.4             |

|    |      |                             |    |      |       |      |      |      |
|----|------|-----------------------------|----|------|-------|------|------|------|
| 14 | 4165 | FIRST INSEMINATION/PREGNANT |    |      |       |      |      |      |
| 15 | 4165 | FIRST INSEMINATION/PREGNANT | 6  | 1.39 | 30.82 | 4.49 | 8.17 | 3.29 |
| 16 | 4165 | FIRST INSEMINATION/PREGNANT | 5  | 2.19 | 32.14 | 4.77 | 8.67 | 3.48 |
| 17 | 4165 | FIRST INSEMINATION/PREGNANT | 3  | 1.78 | 32.11 | 4.72 | 8.58 | 3.44 |
| 18 | 4165 | FIRST INSEMINATION/PREGNANT | 6  | 1.8  | 31.97 | 4.7  | 8.55 | 3.43 |
| 19 | 4165 | FIRST INSEMINATION/PREGNANT | 4  | 2.01 | 31.87 | 4.71 | 8.57 | 3.44 |
| 20 | 4165 | FIRST INSEMINATION/PREGNANT | 5  | 2.26 | 31.71 | 4.71 | 8.58 | 3.44 |
| 21 | 4165 | FIRST INSEMINATION/PREGNANT |    |      |       |      |      |      |
| 22 | 4165 | FIRST INSEMINATION/PREGNANT |    |      |       |      |      |      |
| 23 | 4165 | FIRST INSEMINATION/PREGNANT | 5  | 2.26 | 32.65 | 4.85 | 8.82 | 3.53 |
| 24 | 4165 | FIRST INSEMINATION/PREGNANT | 4  | 1.76 | 33.34 | 4.89 | 8.89 | 3.56 |
| 25 | 4165 | FIRST INSEMINATION/PREGNANT | 8  | 2.08 | 33.26 | 4.91 | 8.94 | 3.57 |
| 26 | 4165 | FIRST INSEMINATION/PREGNANT | 7  | 2.54 | 32.79 | 4.9  | 8.91 | 3.56 |
| 27 | 4165 | FIRST INSEMINATION/PREGNANT | 8  | 1.47 | 32.89 | 4.79 | 8.72 | 3.49 |
| 28 | 4165 | FIRST INSEMINATION/PREGNANT |    |      |       |      |      |      |
| 29 | 4165 | FIRST INSEMINATION/PREGNANT | 5  | 1.92 | 32.91 | 4.85 | 8.81 | 3.53 |
| 30 | 4165 | FIRST INSEMINATION/PREGNANT | 7  | 2.34 | 31.86 | 4.74 | 8.63 | 3.46 |
| 31 | 4165 | FIRST INSEMINATION/PREGNANT | 9  | 2.3  | 32.48 | 4.83 | 8.78 | 3.51 |
| 32 | 4165 | FIRST INSEMINATION/PREGNANT | 5  | 1.66 | 32.7  | 4.79 | 8.71 | 3.49 |
| 33 | 4165 | FIRST INSEMINATION/PREGNANT | 6  | 2.13 | 32.41 | 4.8  | 8.73 | 3.5  |
| 34 | 4165 | FIRST INSEMINATION/PREGNANT | 11 | 2.22 | 32.82 | 4.87 | 8.85 | 3.54 |
| 35 | 4165 | FIRST INSEMINATION/PREGNANT |    |      |       |      |      |      |
| 36 | 4165 | FIRST INSEMINATION/PREGNANT | 10 | 1.76 | 27.29 | 4.03 | 7.34 | 2.99 |
| 37 | 4165 | FIRST INSEMINATION/PREGNANT | 9  | 2.05 | 32.61 | 4.82 | 8.76 | 3.51 |
| 38 | 4165 | FIRST INSEMINATION/PREGNANT | 8  | 2.31 | 32.01 | 4.76 | 8.66 | 3.47 |

|    |      |                             |    |      |       |      |      |      |
|----|------|-----------------------------|----|------|-------|------|------|------|
| 39 | 4165 | FIRST INSEMINATION/PREGNANT | 7  | 1.85 | 33.23 | 4.88 | 8.88 | 3.55 |
| 40 | 4165 | FIRST INSEMINATION/PREGNANT | 8  | 2.2  | 32.07 | 4.76 | 8.66 | 3.47 |
| 41 | 4165 | FIRST INSEMINATION/PREGNANT | 8  | 2.62 | 29.8  | 4.48 | 8.16 | 3.29 |
| 42 | 4165 | FIRST INSEMINATION/PREGNANT |    |      |       |      |      |      |
| 43 | 4165 | FIRST INSEMINATION/PREGNANT | 9  | 2.37 | 33.07 | 4.92 | 8.95 | 3.58 |
| 44 | 4165 | FIRST INSEMINATION/PREGNANT | 13 | 2.36 | 32.28 | 4.8  | 8.74 | 3.5  |
| 45 | 4165 | FIRST INSEMINATION/PREGNANT | 11 | 2.37 | 32.35 | 4.81 | 8.76 | 3.51 |
| 46 | 4165 | FIRST INSEMINATION/PREGNANT | 10 | 2.18 | 31.72 | 4.71 | 8.56 | 3.43 |
| 47 | 4165 | FIRST INSEMINATION/PREGNANT | 10 | 2.11 | 31.97 | 4.73 | 8.61 | 3.45 |
| 48 | 4165 | FIRST INSEMINATION/PREGNANT | 8  | 2.07 | 31.81 | 4.71 | 8.56 | 3.44 |
| 49 | 4165 | FIRST INSEMINATION/PREGNANT |    |      |       |      |      |      |
| 50 | 4165 | FIRST INSEMINATION/PREGNANT |    |      |       |      |      |      |
| 51 | 4165 | FIRST INSEMINATION/PREGNANT | 13 | 2.34 | 32.87 | 4.88 | 8.89 | 3.55 |
| 52 | 4165 | FIRST INSEMINATION/PREGNANT | 14 | 2.38 | 33.42 | 4.97 | 9.04 | 3.61 |
| 53 | 4165 | FIRST INSEMINATION/PREGNANT | 16 | 2.48 | 32.19 | 4.8  | 8.75 | 3.5  |
| 54 | 4165 | FIRST INSEMINATION/PREGNANT | 13 | 2.16 | 32.64 | 4.83 | 8.79 | 3.52 |
| 55 | 4165 | FIRST INSEMINATION/PREGNANT | 14 | 2.14 | 32.48 | 4.81 | 8.75 | 3.5  |
| 56 | 4165 | FIRST INSEMINATION/PREGNANT |    |      |       |      |      |      |
| 57 | 4165 | FIRST INSEMINATION/PREGNANT | 10 | 2.37 | 32.37 | 4.82 | 8.77 | 3.51 |
| 58 | 4165 | FIRST INSEMINATION/PREGNANT | 10 | 1.91 | 32.61 | 4.8  | 8.74 | 3.5  |
| 59 | 4165 | FIRST INSEMINATION/PREGNANT | 10 | 2.29 | 32.95 | 4.89 | 8.9  | 3.56 |
| 60 | 4165 | FIRST INSEMINATION/PREGNANT | 12 | 2.14 | 32.29 | 4.78 | 8.7  | 3.49 |
| 61 | 4165 | FIRST INSEMINATION/PREGNANT | 12 | 1.82 | 32.34 | 4.76 | 8.65 | 3.47 |
| 62 | 4165 | FIRST INSEMINATION/PREGNANT | 11 | 2.02 | 32.85 | 4.85 | 8.82 | 3.53 |
| 63 | 4165 | FIRST INSEMINATION/PREGNANT |    |      |       |      |      |      |

|    |      |                             |    |      |       |      |      |      |
|----|------|-----------------------------|----|------|-------|------|------|------|
| 64 | 4165 | FIRST INSEMINATION/PREGNANT | 12 | 2.36 | 32.44 | 4.83 | 8.79 | 3.52 |
| 65 | 4165 | FIRST INSEMINATION/PREGNANT | 12 | 2.29 | 31.42 | 4.68 | 8.51 | 3.42 |

**n = 2**

| <b>Day</b> | <b>cow number</b> | <b>state</b>                | <b>weather temperature (Celsius)</b> | <b>FAT%</b> | <b>Density%</b> | <b>Lactose%</b> | <b>SNF%</b> | <b>Protein%</b> |
|------------|-------------------|-----------------------------|--------------------------------------|-------------|-----------------|-----------------|-------------|-----------------|
| 1          | 4151              | NON-PREGNANT                | 11                                   | 3.23        | 30.17           | 4.6             | 8.38        | 3.37            |
| 2          | 4151              | NON-PREGNANT                | 11                                   | 2.77        | 30.99           | 4.67            | 8.5         | 3.41            |
| 3          | 4151              | NON-PREGNANT                | 10                                   | 2.33        | 30.85           | 4.6             | 8.37        | 3.36            |
| 4          | 4151              | NON-PREGNANT                | 11                                   | 3.47        | 31.02           | 4.75            | 8.65        | 3.47            |
| 5          | 4151              | NON-PREGNANT                | 9                                    | 3.81        | 30.38           | 4.69            | 8.56        | 3.43            |
| 6          | 4151              | NON-PREGNANT                | 8                                    | 2.58        | 30.37           | 4.56            | 8.3         | 3.34            |
| 7          | 4151              | NON-PREGNANT                | 10                                   |             |                 |                 |             |                 |
| 8          | 4151              | NON-PREGNANT                | 9                                    | 3.43        | 29.76           | 4.56            | 8.32        | 3.34            |
| 9          | 4151              | NON-PREGNANT                | 11                                   | 3.37        | 31.65           | 4.82            | 8.79        | 3.52            |
| 10         | 4151              | NON-PREGNANT                | 8                                    | 3.66        | 30.57           | 4.7             | 8.57        | 3.44            |
| 11         | 4151              | NON-PREGNANT                | 7                                    | 3.77        | 31.13           | 4.79            | 8.74        | 3.5             |
| 12         | 4151              | NON-PREGNANT                | 10                                   | 2.65        | 32.35           | 4.84            | 8.82        | 3.53            |
| 13         | 4151              | NON-PREGNANT                | 10                                   | 3.02        | 31.54           | 4.77            | 8.69        | 3.48            |
| 14         | 4151              | NON-PREGNANT                | 9                                    |             |                 |                 |             |                 |
| 15         | 4151              | FIRST INSEMINATION/PREGNANT | 6                                    | 3.77        | 29.28           | 4.53            | 8.27        | 3.32            |
| 16         | 4151              | FIRST INSEMINATION/PREGNANT | 5                                    | 4.02        | 31.59           | 4.89            | 8.91        | 3.56            |
| 17         | 4151              | FIRST INSEMINATION/PREGNANT | 3                                    | 3.15        | 31.09           | 4.72            | 8.6         | 3.45            |
| 18         | 4151              | FIRST INSEMINATION/PREGNANT | 6                                    | 3.16        | 31.91           | 4.84            | 8.82        | 3.53            |
| 19         | 4151              | FIRST INSEMINATION/PREGNANT | 4                                    | 3.35        | 31.98           | 4.87            | 8.87        | 3.55            |

|    |      |                             |    |      |       |      |      |      |
|----|------|-----------------------------|----|------|-------|------|------|------|
| 20 | 4151 | FIRST INSEMINATION/PREGNANT | 5  | 3.06 | 32.89 | 4.97 | 9.04 | 3.61 |
| 21 | 4151 | FIRST INSEMINATION/PREGNANT | 5  |      |       |      |      |      |
| 22 | 4151 | FIRST INSEMINATION/PREGNANT | 10 |      |       |      |      |      |
| 23 | 4151 | FIRST INSEMINATION/PREGNANT | 5  | 2.98 | 31.17 | 4.71 | 8.59 | 3.44 |
| 24 | 4151 | FIRST INSEMINATION/PREGNANT | 4  | 3.9  | 30.67 | 4.74 | 8.65 | 3.46 |
| 25 | 4151 | FIRST INSEMINATION/PREGNANT | 8  | 2.86 | 30.49 | 4.6  | 8.39 | 3.37 |
| 26 | 4151 | FIRST INSEMINATION/PREGNANT | 7  | 3.32 | 32.1  | 4.88 | 8.89 | 3.56 |
| 27 | 4151 | FIRST INSEMINATION/PREGNANT | 8  | 2.56 | 31.24 | 4.68 | 8.52 | 3.42 |
| 28 | 4151 | FIRST INSEMINATION/PREGNANT | 7  |      |       |      |      |      |
| 29 | 4151 | FIRST INSEMINATION/PREGNANT | 5  | 2.65 | 24.72 | 3.77 | 6.87 | 2.81 |
| 30 | 4151 | FIRST INSEMINATION/PREGNANT | 7  | 3.3  | 31.87 | 4.85 | 8.83 | 3.53 |
| 31 | 4151 | FIRST INSEMINATION/PREGNANT | 9  | 4.05 | 31.16 | 4.83 | 8.8  | 3.52 |
| 32 | 4151 | FIRST INSEMINATION/PREGNANT | 5  | 3.03 | 30.9  | 4.68 | 8.53 | 3.42 |
| 33 | 4151 | FIRST INSEMINATION/PREGNANT | 6  |      |       |      |      |      |
| 34 | 4151 | FIRST INSEMINATION/PREGNANT | 11 | 2.88 | 31    | 4.68 | 8.52 | 3.42 |
| 35 | 4151 | FIRST INSEMINATION/PREGNANT | 10 |      |       |      |      |      |
| 36 | 4151 | FIRST INSEMINATION/PREGNANT | 10 | 3.34 | 30.92 | 4.72 | 8.6  | 3.45 |
| 37 | 4151 | FIRST INSEMINATION/PREGNANT | 9  | 3.2  | 30.81 | 4.69 | 8.54 | 3.43 |
| 38 | 4151 | FIRST INSEMINATION/PREGNANT | 8  | 3.63 | 30.99 | 4.76 | 8.68 | 3.48 |
| 39 | 4151 | FIRST INSEMINATION/PREGNANT | 7  | 3.53 | 30.87 | 4.73 | 8.62 | 3.46 |
| 40 | 4151 | FIRST INSEMINATION/PREGNANT | 8  | 3.29 | 30.53 | 4.66 | 8.49 | 3.41 |
| 41 | 4151 | FIRST INSEMINATION/PREGNANT | 8  | 4.09 | 31.11 | 4.83 | 8.8  | 3.52 |
| 42 | 4151 | FIRST INSEMINATION/PREGNANT | 9  |      |       |      |      |      |
| 43 | 4151 | FIRST INSEMINATION/PREGNANT | 9  | 3.59 | 30.65 | 4.71 | 8.58 | 3.44 |
| 44 | 4151 | FIRST INSEMINATION/PREGNANT | 13 | 4.13 | 30.54 | 4.75 | 8.66 | 3.47 |
| 45 | 4151 | FIRST INSEMINATION/PREGNANT | 11 | 3.57 | 31.94 | 4.89 | 8.91 | 3.56 |
| 46 | 4151 | FIRST INSEMINATION/PREGNANT | 10 | 3.63 | 30.59 | 4.7  | 8.57 | 3.44 |



|    |      |                             |    |      |       |      |      |      |
|----|------|-----------------------------|----|------|-------|------|------|------|
| 47 | 4151 | FIRST INSEMINATION/PREGNANT | 10 | 3.28 | 31.71 | 4.82 | 8.79 | 3.52 |
| 48 | 4151 | FIRST INSEMINATION/PREGNANT | 8  | 3.01 | 31.63 | 4.78 | 8.71 | 3.49 |
| 49 | 4151 | FIRST INSEMINATION/PREGNANT |    |      |       |      |      |      |
| 50 | 4151 | FIRST INSEMINATION/PREGNANT | 13 |      |       |      |      |      |
| 51 | 4151 | FIRST INSEMINATION/PREGNANT | 13 | 3    | 30.98 | 4.69 | 8.54 | 3.43 |
| 52 | 4151 | FIRST INSEMINATION/PREGNANT | 14 | 3.43 | 30.65 | 4.69 | 8.55 | 3.43 |
| 53 | 4151 | FIRST INSEMINATION/PREGNANT | 16 | 3.48 | 30.38 | 4.66 | 8.49 | 3.41 |
| 54 | 4151 | FIRST INSEMINATION/PREGNANT | 13 | 3.36 | 31.11 | 4.75 | 8.65 | 3.47 |
| 55 | 4151 | FIRST INSEMINATION/PREGNANT | 14 | 3.34 | 31.56 | 4.81 | 8.76 | 3.51 |
| 56 | 4151 | FIRST INSEMINATION/PREGNANT | 13 |      |       |      |      |      |
| 57 | 4151 | FIRST INSEMINATION/PREGNANT | 10 | 3.48 | 29.82 | 4.58 | 8.34 | 3.35 |
| 58 | 4151 | FIRST INSEMINATION/PREGNANT | 10 | 3.28 | 31.54 | 4.8  | 8.74 | 3.5  |
| 59 | 4151 | FIRST INSEMINATION/PREGNANT | 10 | 3.59 | 31.21 | 4.79 | 8.72 | 3.49 |
| 60 | 4151 | FIRST INSEMINATION/PREGNANT | 12 | 3.26 | 30.23 | 4.61 | 8.4  | 3.38 |
| 61 | 4151 | FIRST INSEMINATION/PREGNANT | 12 | 3.16 | 30.76 | 4.68 | 8.52 | 3.42 |
| 62 | 4151 | FIRST INSEMINATION/PREGNANT | 11 | 3.13 | 30.49 | 4.63 | 8.44 | 3.39 |
| 63 | 4151 | FIRST INSEMINATION/PREGNANT |    |      |       |      |      |      |
| 64 | 4151 | FIRST INSEMINATION/PREGNANT | 12 | 2.86 | 29.31 | 4.44 | 8.09 | 3.26 |
| 65 | 4151 | FIRST INSEMINATION/PREGNANT | 12 | 2.93 | 30.4  | 4.6  | 8.38 | 3.37 |

n = 3

| Day | cow number | state              | weather temperature (Celsius) | Fat % | Density% | Lactose% | SNF% | Protein% |
|-----|------------|--------------------|-------------------------------|-------|----------|----------|------|----------|
| 1   | 3936       | NON-PREGNANT       | 11                            | 3.73  | 26.07    | 4.08     | 7.44 | 3.02     |
| 2   | 3936       | NON-PREGNANT       | 11                            | 4.17  | 29.01    | 4.54     | 8.28 | 3.33     |
| 3   | 3936       | NON-PREGNANT       | 10                            | 3.07  | 30.38    | 4.61     | 8.4  | 3.38     |
| 4   | 3936       | NON-PREGNANT       | 11                            | 2.55  | 29.71    | 4.46     | 8.13 | 3.27     |
| 5   | 3936       | NON-PREGNANT       | 9                             | 2.24  | 30.4     | 4.53     | 8.24 | 3.32     |
| 6   | 3936       | NON-PREGNANT       | 8                             | 3.92  | 28.84    | 4.49     | 8.18 | 3.29     |
| 7   | 3936       | NON-PREGNANT       | 10                            |       |          |          |      |          |
| 8   | 3936       | NON-PREGNANT       | 9                             | 2.55  | 29.71    | 4.46     | 8.13 | 3.27     |
| 9   | 3936       | NON-PREGNANT       | 11                            | 2.43  | 29.69    | 4.45     | 8.09 | 3.26     |
| 10  | 3936       | NON-PREGNANT       | 8                             | 2.03  | 30.29    | 4.49     | 8.17 | 3.29     |
| 11  | 3936       | NON-PREGNANT       | 7                             | 3.41  | 30.07    | 4.61     | 8.39 | 3.37     |
| 12  | 3936       | NON-PREGNANT       | 10                            | 2.96  | 29.53    | 4.48     | 8.16 | 3.29     |
| 13  | 3936       | FIRST INSEMINATION | 10                            | 3.19  | 29.35    | 4.48     | 8.17 | 3.29     |
| 14  | 3936       | FIRST INSEMINATION | 9                             |       |          |          |      |          |
| 15  | 3936       | FIRST INSEMINATION | 6                             |       |          |          |      |          |
| 16  | 3936       | FIRST INSEMINATION | 5                             | 2.68  | 30.89    | 4.64     | 8.45 | 3.39     |
| 17  | 3936       | FIRST INSEMINATION | 3                             | 2.09  | 30.68    | 4.55     | 8.28 | 3.33     |
| 18  | 3936       | FIRST INSEMINATION | 6                             | 2.35  | 30.64    | 4.57     | 8.32 | 3.35     |
| 19  | 3936       | FIRST INSEMINATION | 4                             | 2.5   | 29.77    | 4.47     | 8.13 | 3.28     |
| 20  | 3936       | FIRST INSEMINATION | 5                             | 2.32  | 30.78    | 4.59     | 8.35 | 3.36     |
| 21  | 3936       | FIRST INSEMINATION | 5                             |       |          |          |      |          |
| 22  | 3936       | FIRST INSEMINATION | 10                            |       |          |          |      |          |
| 23  | 3936       | FIRST INSEMINATION | 5                             | 2.88  | 29.76    | 4.5      | 8.2  | 3.3      |

|    |      |                     |    |      |       |      |      |      |
|----|------|---------------------|----|------|-------|------|------|------|
| 24 | 3936 | FIRST INSEMINATION  | 4  | 3.61 | 29.89 | 4.6  | 8.39 | 3.37 |
| 25 | 3936 | FIRST INSEMINATION  | 8  | 1.96 | 30.63 | 4.53 | 8.24 | 3.32 |
| 26 | 3936 | FIRST INSEMINATION  | 7  | 2.88 | 29.68 | 4.49 | 8.19 | 3.3  |
| 27 | 3936 | FIRST INSEMINATION  | 8  | 3.11 | 30.19 | 4.59 | 8.36 | 3.36 |
| 28 | 3936 | FIRST INSEMINATION  | 7  |      |       |      |      |      |
| 29 | 3936 | FIRST INSEMINATION  | 5  | 2.01 | 29.8  | 4.42 | 8.04 | 3.24 |
| 30 | 3936 | FIRST INSEMINATION  | 7  | 2.39 | 29.72 | 4.45 | 8.09 | 3.26 |
| 31 | 3936 | FIRST INSEMINATION  | 9  | 3.5  | 29.02 | 4.47 | 8.14 | 3.28 |
| 32 | 3936 | FIRST INSEMINATION  | 5  | 4.12 | 28.78 | 4.5  | 8.21 | 3.3  |
| 33 | 3936 | FIRST INSEMINATION  | 6  | 2.74 | 29.14 | 4.4  | 8.02 | 3.24 |
| 34 | 3936 | FIRST INSEMINATION  | 11 | 3.49 | 29.87 | 4.59 | 8.36 | 3.36 |
| 35 | 3936 | FIRST INSEMINATION  | 10 |      |       |      |      |      |
| 36 | 3936 | FIRST INSEMINATION  | 10 | 2.11 | 30.16 | 4.48 | 8.15 | 3.28 |
| 37 | 3936 | FIRST INSEMINATION  | 9  | 2.86 | 28.82 | 4.37 | 7.96 | 3.21 |
| 38 | 3936 | SECOND INSEMINATION | 8  | 2.27 | 29.2  | 4.36 | 7.94 | 3.2  |
| 39 | 3936 | SECOND INSEMINATION | 7  | 3.84 | 29.34 | 4.55 | 8.3  | 3.34 |
| 40 | 3936 | SECOND INSEMINATION | 8  | 2.68 | 30.54 | 4.59 | 8.36 | 3.36 |
| 41 | 3936 | THIRD INSEMINATION  | 8  | 4.22 | 30.05 | 4.69 | 8.56 | 3.43 |
| 42 | 3936 | THIRD INSEMINATION  | 9  |      |       |      |      |      |
| 43 | 3936 | THIRD INSEMINATION  | 9  | 2.46 | 30.88 | 4.62 | 8.41 | 3.38 |
| 44 | 3936 | THIRD INSEMINATION  | 13 | 2.79 | 30.38 | 4.58 | 8.35 | 3.35 |
| 45 | 3936 | THIRD INSEMINATION  | 11 | 1.82 | 31.4  | 4.62 | 8.41 | 3.38 |
| 46 | 3936 | THIRD INSEMINATION  | 10 | 4.34 | 30.22 | 4.73 | 8.62 | 3.46 |
| 47 | 3936 | THIRD INSEMINATION  | 10 | 2.98 | 30.09 | 4.56 | 8.31 | 3.34 |
| 48 | 3936 | THIRD INSEMINATION  | 8  | 2.99 | 30.18 | 4.58 | 8.34 | 3.35 |
| 49 | 3936 | THIRD INSEMINATION  |    |      |       |      |      |      |
| 50 | 3936 | THIRD INSEMINATION  | 13 |      |       |      |      |      |

|    |      |                    |    |      |       |      |      |      |
|----|------|--------------------|----|------|-------|------|------|------|
| 51 | 3936 | THIRD INSEMINATION | 13 | 2.82 | 30.12 | 4.55 | 8.28 | 3.33 |
| 52 | 3936 | THIRD INSEMINATION | 14 | 2.33 | 29.89 | 4.46 | 8.13 | 3.27 |
| 53 | 3936 | THIRD INSEMINATION | 16 | 3.06 | 29.54 | 4.49 | 8.19 | 3.3  |
| 54 | 3936 | THIRD INSEMINATION | 13 | 2.51 | 30.66 | 4.59 | 8.36 | 3.36 |
| 55 | 3936 | THIRD INSEMINATION | 14 | 3.6  | 29.08 | 4.49 | 8.18 | 3.29 |
| 56 | 3936 | THIRD INSEMINATION | 13 |      |       |      |      |      |
| 57 | 3936 | THIRD INSEMINATION | 10 | 3.54 | 30.35 | 4.66 | 8.49 | 3.41 |
| 58 | 3936 | THIRD INSEMINATION | 10 | 3.38 | 29.6  | 4.54 | 8.27 | 3.33 |
| 59 | 3936 | THIRD INSEMINATION | 10 | 4.21 | 30.01 | 4.68 | 8.54 | 3.43 |
| 60 | 3936 | THIRD INSEMINATION | 12 | 2.3  | 30.15 | 4.5  | 8.19 | 3.3  |
| 61 | 3936 | THIRD INSEMINATION | 12 | 3.16 | 29.47 | 4.49 | 8.19 | 3.3  |
| 62 | 3936 | THIRD INSEMINATION | 11 | 1.21 | 30.07 | 4.37 | 7.94 | 3.21 |
| 63 | 3936 | THIRD INSEMINATION |    |      |       |      |      |      |
| 64 | 3936 | THIRD INSEMINATION | 12 | 3.48 | 29.77 | 4.57 | 8.33 | 3.35 |
| 65 | 3936 | THIRD INSEMINATION | 12 | 3.31 | 29.52 | 4.52 | 8.23 | 3.31 |

**n = 4**

| Day | cow number | state              | weather temperature (Celsius) | Fat % | Density% | Lactose% | SNF% | Protein% |
|-----|------------|--------------------|-------------------------------|-------|----------|----------|------|----------|
| 1   | 4176       | NON-PREGNANT       | 11                            | 3.33  | 29.19    | 4.47     | 8.15 | 3.28     |
| 2   | 4176       | NON-PREGNANT       | 11                            | 2.9   | 30.69    | 4.64     | 8.45 | 3.39     |
| 3   | 4176       | NON-PREGNANT       | 10                            | 2.15  | 30.32    | 4.5      | 8.2  | 3.3      |
| 4   | 4176       | FIRST INSEMINATION | 11                            | 3.15  | 30.74    | 4.67     | 8.51 | 3.42     |
| 5   | 4176       | FIRST INSEMINATION | 9                             | 4.61  | 29.31    | 4.63     | 8.45 | 3.39     |
| 6   | 4176       | FIRST INSEMINATION | 8                             | 3.98  | 31.05    | 4.81     | 8.76 | 3.51     |
| 7   | 4176       | FIRST INSEMINATION | 10                            |       |          |          |      |          |

|    |      |                     |    |      |       |      |      |      |
|----|------|---------------------|----|------|-------|------|------|------|
| 8  | 4176 | FIRST INSEMINATION  | 9  | 3.27 | 29.74 | 4.54 | 8.28 | 3.33 |
| 9  | 4176 | FIRST INSEMINATION  | 11 | 3.55 | 30.84 | 4.73 | 8.62 | 3.45 |
| 10 | 4176 | FIRST INSEMINATION  | 8  | 4.08 | 30.05 | 4.68 | 8.53 | 3.42 |
| 11 | 4176 | FIRST INSEMINATION  | 7  | 3.22 | 29.65 | 4.53 | 8.25 | 3.32 |
| 12 | 4176 | FIRST INSEMINATION  | 10 | 3.15 | 29.78 | 4.54 | 8.27 | 3.33 |
| 13 | 4176 | FIRST INSEMINATION  | 10 | 0.93 | 29.77 | 4.3  | 7.81 | 3.16 |
| 14 | 4176 | FIRST INSEMINATION  | 9  |      |       |      |      |      |
| 15 | 4176 | FIRST INSEMINATION  | 6  | 2.79 | 30.94 | 4.66 | 8.49 | 3.41 |
| 16 | 4176 | FIRST INSEMINATION  | 5  | 3.35 | 30.52 | 4.66 | 8.5  | 3.41 |
| 17 | 4176 | FIRST INSEMINATION  | 3  | 2.91 | 31.09 | 4.7  | 8.55 | 3.43 |
| 18 | 4176 | FIRST INSEMINATION  | 6  | 4.19 | 29.61 | 4.62 | 8.44 | 3.39 |
| 19 | 4176 | FIRST INSEMINATION  | 4  | 3.27 | 29.97 | 4.58 | 8.34 | 3.35 |
| 20 | 4176 | FIRST INSEMINATION  | 5  | 6.01 | 30.44 | 4.94 | 9.02 | 3.6  |
| 21 | 4176 | FIRST INSEMINATION  | 5  |      |       |      |      |      |
| 22 | 4176 | FIRST INSEMINATION  | 10 |      |       |      |      |      |
| 23 | 4176 | FIRST INSEMINATION  | 5  | 3.42 | 30.16 | 4.62 | 8.42 | 3.38 |
| 24 | 4176 | FIRST INSEMINATION  | 4  | 4.46 | 30.37 | 4.76 | 8.69 | 3.48 |
| 25 | 4176 | SECOND INSEMINATION | 8  |      |       |      |      |      |
| 26 | 4176 | SECOND INSEMINATION | 7  | 3.89 | 30.58 | 4.73 | 8.62 | 3.46 |
| 27 | 4176 | SECOND INSEMINATION | 8  | 3.87 | 30.81 | 4.76 | 8.68 | 3.48 |
| 28 | 4176 | SECOND INSEMINATION | 7  |      |       |      |      |      |
| 29 | 4176 | SECOND INSEMINATION | 5  | 3.31 | 30.27 | 4.62 | 8.43 | 3.38 |
| 30 | 4176 | SECOND INSEMINATION | 7  | 4.3  | 29.88 | 4.67 | 8.53 | 3.42 |
| 31 | 4176 | SECOND INSEMINATION | 9  | 3.93 | 30.62 | 4.74 | 8.64 | 3.46 |
| 32 | 4176 | SECOND INSEMINATION | 5  | 3.52 | 29.98 | 4.6  | 8.39 | 3.37 |
| 33 | 4176 | SECOND INSEMINATION | 6  | 3.04 | 30.24 | 4.59 | 8.36 | 3.36 |
| 34 | 4176 | SECOND INSEMINATION | 11 | 3.24 | 30.24 | 4.61 | 8.4  | 3.37 |
| 35 | 4176 | SECOND INSEMINATION | 10 |      |       |      |      |      |

|    |      |                     |    |      |       |      |      |      |
|----|------|---------------------|----|------|-------|------|------|------|
| 36 | 4176 | SECOND INSEMINATION | 10 | 3.41 | 30.65 | 4.69 | 8.54 | 3.43 |
| 37 | 4176 | SECOND INSEMINATION | 9  | 3.65 | 30.97 | 4.76 | 8.67 | 3.47 |
| 38 | 4176 | SECOND INSEMINATION | 8  | 3.1  | 30.23 | 4.6  | 8.37 | 3.36 |
| 39 | 4176 | SECOND INSEMINATION | 7  | 3.47 | 30.06 | 4.61 | 8.4  | 3.38 |
| 40 | 4176 | SECOND INSEMINATION | 8  | 2.82 | 30.52 | 4.6  | 8.39 | 3.37 |
| 41 | 4176 | THIRD INSEMINATION  | 8  | 3.56 | 31.07 | 4.76 | 8.68 | 3.48 |
| 42 | 4176 | THIRD INSEMINATION  | 9  |      |       |      |      |      |
| 43 | 4176 | THIRD INSEMINATION  | 9  | 3.61 | 30.27 | 4.66 | 8.49 | 3.41 |
| 44 | 4176 | THIRD INSEMINATION  | 13 | 3.66 | 29.93 | 4.61 | 8.41 | 3.38 |
| 45 | 4176 | THIRD INSEMINATION  | 11 | 3.41 | 30.11 | 4.61 | 8.41 | 3.38 |
| 46 | 4176 | THIRD INSEMINATION  | 10 | 3.06 | 30.48 | 4.62 | 8.43 | 3.38 |
| 47 | 4176 | THIRD INSEMINATION  | 10 | 3.42 | 30.16 | 4.62 | 8.42 | 3.38 |
| 48 | 4176 | FOURTH INSEMINATION | 8  | 3.42 | 27.39 | 4.23 | 7.71 | 3.12 |
| 49 | 4176 | FOURTH INSEMINATION |    |      |       |      |      |      |
| 50 | 4176 | FOURTH INSEMINATION | 13 |      |       |      |      |      |
| 51 | 4176 | FOURTH INSEMINATION | 13 | 3.69 | 31.03 | 4.77 | 8.7  | 3.48 |
| 52 | 4176 | FOURTH INSEMINATION | 14 | 3.34 | 30.62 | 4.68 | 8.52 | 3.42 |
| 53 | 4176 | FOURTH INSEMINATION | 16 | 3.3  | 30.37 | 4.64 | 8.46 | 3.39 |
| 54 | 4176 | FOURTH INSEMINATION | 13 | 3.91 | 30.38 | 4.7  | 8.58 | 3.44 |
| 55 | 4176 | FOURTH INSEMINATION | 14 | 3.63 | 30.08 | 4.63 | 8.44 | 3.39 |
| 56 | 4176 | FOURTH INSEMINATION | 13 |      |       |      |      |      |
| 57 | 4176 | FOURTH INSEMINATION | 10 | 3.08 | 28.97 | 4.41 | 8.04 | 3.24 |
| 58 | 4176 | FOURTH INSEMINATION | 10 | 3.47 | 30.5  | 4.67 | 8.52 | 3.42 |
| 59 | 4176 | FOURTH INSEMINATION | 10 | 3.59 | 30.67 | 4.71 | 8.58 | 3.44 |
| 60 | 4176 | FOURTH INSEMINATION | 12 | 3.38 | 30.03 | 4.6  | 8.38 | 3.37 |
| 61 | 4176 | FOURTH INSEMINATION | 12 | 3.24 | 30.21 | 4.61 | 8.4  | 3.37 |
| 62 | 4176 | FOURTH INSEMINATION | 11 |      |       |      |      |      |
| 63 | 4176 | FOURTH INSEMINATION |    |      |       |      |      |      |

|    |      |                     |    |      |       |      |      |      |
|----|------|---------------------|----|------|-------|------|------|------|
| 64 | 4176 | FOURTH INSEMINATION | 12 | 3.74 | 30.53 | 4.71 | 8.58 | 3.44 |
| 65 | 4176 | FOURTH INSEMINATION | 12 | 3.79 | 29.44 | 4.56 | 8.31 | 3.34 |

**n = 5**

| <b>Day</b> | <b>cow number</b> | <b>state</b>       | <b>weather temperature (Celsius)</b> | <b>FAT%</b> | <b>Density%</b> | <b>Lactose%</b> | <b>SNF%</b> | <b>Protein%</b> |
|------------|-------------------|--------------------|--------------------------------------|-------------|-----------------|-----------------|-------------|-----------------|
| 1          | 4049              | NON-PREGNANT       | 11                                   | 3.51        | 28.97           | 4.46            | 8.13        | 3.28            |
| 2          | 4049              | NON-PREGNANT       | 11                                   | 2.85        | 29.83           | 4.51            | 8.22        | 3.31            |
| 3          | 4049              | NON-PREGNANT       | 10                                   | 3.12        | 29.64           | 4.51            | 8.23        | 3.31            |
| 4          | 4049              | NON-PREGNANT       | 11                                   | 4.15        | 28.63           | 4.48            | 8.18        | 3.29            |
| 5          | 4049              | NON-PREGNANT       | 9                                    | 3.86        | 28.99           | 4.5             | 8.21        | 3.3             |
| 6          | 4049              | NON-PREGNANT       | 8                                    | 3.82        | 28.43           | 4.42            | 8.06        | 3.25            |
| 7          | 4049              | NON-PREGNANT       | 10                                   |             |                 |                 |             |                 |
| 8          | 4049              | NON-PREGNANT       | 9                                    | 1.65        | 29.79           | 4.38            | 7.96        | 3.21            |
| 9          | 4049              | NON-PREGNANT       | 11                                   | 2.62        | 28.79           | 4.34            | 7.9         | 3.19            |
| 10         | 4049              | NON-PREGNANT       | 8                                    | 2.83        | 29.81           | 4.51            | 8.21        | 3.3             |
| 11         | 4049              | NON-PREGNANT       | 7                                    | 3.21        | 28.97           | 4.43            | 8.07        | 3.25            |
| 12         | 4049              | NON-PREGNANT       | 10                                   | 3.68        | 28.69           | 4.44            | 8.1         | 3.26            |
| 13         | 4049              | FIRST INSEMINATION | 10                                   | 3.96        | 28.81           | 4.49            | 8.18        | 3.29            |
| 14         | 4049              | FIRST INSEMINATION | 9                                    |             |                 |                 |             |                 |
| 15         | 4049              | FIRST INSEMINATION | 6                                    | 3.06        | 29.12           | 4.43            | 8.08        | 3.26            |
| 16         | 4049              | FIRST INSEMINATION | 5                                    | 3.61        | 28.74           | 4.44            | 8.1         | 3.26            |
| 17         | 4049              | FIRST INSEMINATION | 3                                    | 3.46        | 29.85           | 4.58            | 8.35        | 3.35            |
| 18         | 4049              | FIRST INSEMINATION | 6                                    | 2.97        | 29.22           | 4.44            | 8.09        | 3.26            |
| 19         | 4049              | FIRST INSEMINATION | 4                                    | 3.01        | 29.64           | 4.5             | 8.2         | 3.3             |

|    |      |                     |    |      |       |      |      |      |
|----|------|---------------------|----|------|-------|------|------|------|
| 20 | 4049 | FIRST INSEMINATION  | 5  | 3.37 | 29.77 | 4.56 | 8.31 | 3.34 |
| 21 | 4049 | FIRST INSEMINATION  | 5  |      |       |      |      |      |
| 22 | 4049 | FIRST INSEMINATION  | 10 |      |       |      |      |      |
| 23 | 4049 | FIRST INSEMINATION  | 5  | 3.79 | 29.84 | 4.61 | 8.41 | 3.38 |
| 24 | 4049 | FIRST INSEMINATION  | 4  | 3.84 | 29.72 | 4.6  | 8.39 | 3.37 |
| 25 | 4049 | FIRST INSEMINATION  | 8  | 3.7  | 30.18 | 4.65 | 8.48 | 3.4  |
| 26 | 4049 | FIRST INSEMINATION  | 7  | 2.56 | 29.95 | 4.5  | 8.19 | 1.15 |
| 27 | 4049 | FIRST INSEMINATION  | 8  | 2.2  | 30.17 | 4.49 | 8.17 | 3.29 |
| 28 | 4049 | FIRST INSEMINATION  | 7  |      |       |      |      |      |
| 29 | 4049 | FIRST INSEMINATION  | 5  | 3.47 | 28.63 | 4.41 | 8.04 | 3.24 |
| 30 | 4049 | FIRST INSEMINATION  | 7  | 4.17 | 28.49 | 4.46 | 8.15 | 3.28 |
| 31 | 4049 | FIRST INSEMINATION  | 9  | 4.17 | 29.45 | 4.6  | 8.39 | 3.37 |
| 32 | 4049 | FIRST INSEMINATION  | 5  | 4.64 | 28.34 | 4.49 | 8.2  | 3.3  |
| 33 | 4049 | FIRST INSEMINATION  | 6  | 4.09 | 29.77 | 4.64 | 8.46 | 3.39 |
| 34 | 4049 | FIRST INSEMINATION  | 11 | 4.19 | 29.96 | 4.67 | 8.58 | 3.42 |
| 35 | 4049 | FIRST INSEMINATION  | 10 |      |       |      |      |      |
| 36 | 4049 | FIRST INSEMINATION  | 10 | 3.07 | 30.36 | 4.61 | 8.4  | 3.37 |
| 37 | 4049 | FIRST INSEMINATION  | 9  | 3.15 | 29.57 | 4.51 | 8.21 | 3.31 |
| 38 | 4049 | SECOND INSEMINATION | 8  | 2.76 | 29.59 | 4.47 | 8.14 | 3.28 |
| 39 | 4049 | SECOND INSEMINATION | 7  | 4.25 | 29.23 | 4.58 | 8.35 | 3.36 |
| 40 | 4049 | SECOND INSEMINATION | 8  | 3.89 | 29.5  | 4.58 | 8.35 | 3.35 |
| 41 | 4049 | SECOND INSEMINATION | 8  | 4.51 | 30.1  | 4.73 | 8.63 | 3.46 |
| 42 | 4049 | SECOND INSEMINATION | 9  |      |       |      |      |      |
| 43 | 4049 | SECOND INSEMINATION | 9  | 3.02 | 30.97 | 4.69 | 8.55 | 3.43 |
| 44 | 4049 | SECOND INSEMINATION | 13 | 3.02 | 30.46 | 4.62 | 8.41 | 3.38 |
| 45 | 4049 | SECOND INSEMINATION | 11 | 2.99 | 30.35 | 4.6  | 8.38 | 3.37 |
| 46 | 4049 | SECOND INSEMINATION | 10 | 2.85 | 30.35 | 4.58 | 8.35 | 3.36 |



|    |      |                     |    |      |       |      |       |      |
|----|------|---------------------|----|------|-------|------|-------|------|
| 47 | 4049 | SECOND INSEMINATION | 10 | 2.89 | 29.45 | 4.46 | 8.13  | 3.27 |
| 48 | 4049 | SECOND INSEMINATION | 8  | 3.16 | 30.27 | 4.61 | 8.39  | 3.37 |
| 49 | 4049 | SECOND INSEMINATION |    |      |       |      |       |      |
| 50 | 4049 | SECOND INSEMINATION | 13 |      |       |      |       |      |
| 51 | 4049 | SECOND INSEMINATION | 13 | 3.22 | 29.32 | 4.48 | 8.16  | 3.29 |
| 52 | 4049 | SECOND INSEMINATION | 14 | 3.92 | 29.54 | 4.59 | 8.36  | 3.36 |
| 53 | 4049 | SECOND INSEMINATION | 16 | 3.34 | 29.28 | 4.49 | 8.18  | 3.29 |
| 54 | 4049 | SECOND INSEMINATION | 13 | 3.11 | 30.12 | 4.58 | 8.34  | 3.35 |
| 55 | 4049 | SECOND INSEMINATION | 14 | 4.01 | 29.08 | 4.53 | 8.26  | 3.32 |
| 56 | 4049 | SECOND INSEMINATION | 13 |      |       |      |       |      |
| 57 | 4049 | SECOND INSEMINATION | 10 | 2.8  | 30.07 | 4.54 | 8.27  | 3.33 |
| 58 | 4049 | SECOND INSEMINATION | 10 | 3.73 | 30.58 | 4.71 | 8.59  | 3.44 |
| 59 | 4049 | SECOND INSEMINATION | 10 | 4.26 | 30.61 | 4.77 | 8.71  | 3.49 |
| 60 | 4049 | SECOND INSEMINATION | 12 | 3.47 | 28.6  | 4.40 | 8.03  | 3.24 |
| 61 | 4049 | SECOND INSEMINATION | 12 | 5.5  | 28.74 | 4.64 | 8..48 | 3.4  |
| 62 | 4049 | SECOND INSEMINATION | 11 | 3.17 | 29.19 | 4.46 | 8.12  | 3.27 |
| 63 | 4049 | SECOND INSEMINATION |    |      |       |      |       |      |
| 64 | 4049 | SECOND INSEMINATION | 12 | 3.14 | 29.29 | 4.47 | 8.14  | 3.28 |
| 65 | 4049 | SECOND INSEMINATION | 12 | 2.79 | 29.09 | 4.4  | 8.02  | 3.23 |

**n = 6 / Measured during 34 days, extracted from group due to illness and death**

| <b>Day</b> | <b>cow number</b> | <b>state</b>       | <b>weather temperature (Celsius)</b> | <b>FAT%</b> | <b>Density%</b> | <b>Lactose%</b> | <b>SNF%</b> | <b>Protein%</b> |
|------------|-------------------|--------------------|--------------------------------------|-------------|-----------------|-----------------|-------------|-----------------|
| 1          | 3916              | NON-PREGNANT       | 11                                   | 2.01        | 29.75           | 4.41            | 8.03        | 3.24            |
| 2          | 3916              | NON-PREGNANT       | 11                                   | 3.94        | 27.82           | 4.35            | 7.93        | 3.2             |
| 3          | 3916              | NON-PREGNANT       | 10                                   | 3.59        | 27.25           | 4.23            | 7.71        | 3.12            |
| 4          | 3916              | NON-PREGNANT       | 11                                   | 4.35        | 26.75           | 4.24            | 7.74        | 3.13            |
| 5          | 3916              | NON-PREGNANT       | 9                                    | 4.39        | 26.53           | 4.21            | 7.69        | 3.11            |
| 6          | 3916              | NON-PREGNANT       | 8                                    | 3.94        | 26.72           | 4.19            | 7.65        | 3.1             |
| 7          | 3916              | NON-PREGNANT       | 10                                   |             |                 |                 |             |                 |
| 8          | 3916              | NON-PREGNANT       | 9                                    | 3.56        | 27.53           | 4.26            | 7.78        | 3.15            |
| 9          | 3916              | NON-PREGNANT       | 11                                   | 3.19        | 27.9            | 4.28            | 7.79        | 3.15            |
| 10         | 3916              | NON-PREGNANT       | 8                                    | 3.76        | 27.88           | 4.33            | 7.9         | 3.19            |
| 11         | 3916              | NON-PREGNANT       | 7                                    | 4.2         | 27.24           | 4.29            | 7.83        | 3.17            |
| 12         | 3916              | NON-PREGNANT       | 10                                   |             |                 |                 |             |                 |
| 13         | 3916              | FIRST INSEMINATION | 10                                   | 4.28        | 27.6            | 4.35            | 7.94        | 3.21            |
| 14         | 3916              | FIRST INSEMINATION | 9                                    |             |                 |                 |             |                 |
| 15         | 3916              | FIRST INSEMINATION | 6                                    | 3.71        | 27.58           | 4.29            | 7.82        | 3.16            |
| 16         | 3916              | FIRST INSEMINATION | 5                                    | 6.88        | 26.43           | 4.47            | 8.18        | 3.29            |
| 17         | 3916              | FIRST INSEMINATION | 3                                    | 3.73        | 28.16           | 4.37            | 7.97        | 3.22            |
| 18         | 3916              | FIRST INSEMINATION | 6                                    | 3.96        | 27.66           | 4.32            | 7.89        | 3.19            |
| 19         | 3916              | FIRST INSEMINATION | 4                                    | 4.19        | 25.86           | 4.09            | 7.48        | 3.03            |
| 20         | 3916              | FIRST INSEMINATION | 5                                    | 4.95        | 27.43           | 4.4             | 8.03        | 3.24            |
| 21         | 3916              | FIRST INSEMINATION | 5                                    |             |                 |                 |             |                 |
| 22         | 3916              | FIRST INSEMINATION | 10                                   |             |                 |                 |             |                 |
| 23         | 3916              | FIRST INSEMINATION | 5                                    | 4.81        | 26.63           | 4.27            | 7.8         | 3.15            |

|    |      |                    |    |      |       |      |      |      |
|----|------|--------------------|----|------|-------|------|------|------|
| 24 | 3916 | FIRST INSEMINATION | 4  | 4.08 | 27.1  | 4.26 | 7.77 | 3.14 |
| 25 | 3916 | FIRST INSEMINATION | 8  | 1.02 | 27.22 | 3.95 | 7.17 | 2.93 |
| 26 | 3916 | FIRST INSEMINATION | 7  | 5.69 | 26.3  | 4.32 | 7.9  | 3.19 |
| 27 | 3916 | FIRST INSEMINATION | 8  | 4.77 | 26.26 | 4.21 | 7.7  | 3.12 |
| 28 | 3916 | FIRST INSEMINATION | 7  |      |       |      |      |      |
| 29 | 3916 | SICK               | 5  | 3.95 | 20.79 | 3.35 | 6.13 | 2.54 |
| 30 | 3916 | FIRST INSEMINATION | 7  | 4.32 | 27.17 | 4.3  | 7.84 | 3.17 |
| 31 | 3916 | FIRST INSEMINATION | 9  | 4.63 | 25.93 | 4.15 | 7.59 | 3.07 |
| 32 | 3916 | FIRST INSEMINATION | 5  | 5.55 | 26.13 | 4.28 | 7.83 | 3.16 |
| 33 | 3916 | FIRST INSEMINATION | 6  | 4.63 | 25.93 | 4.15 | 7.59 | 3.07 |
| 34 | 3916 | FIRST INSEMINATION | 11 | 5.55 | 26.13 | 4.28 | 7.83 | 3.16 |

**n = 7**

| <b>Day</b> | <b>cow number</b> | <b>state</b> | <b>weather temperature (Celsius)</b> | <b>Fat%</b> | <b>Density%</b> | <b>Lactose%</b> | <b>SNF%</b> | <b>Protein%</b> |
|------------|-------------------|--------------|--------------------------------------|-------------|-----------------|-----------------|-------------|-----------------|
| 1          | 4143              | NON-PREGNANT | 11                                   | 3.87        | 29.83           | 4.62            | 8.43        | 3.38            |
| 2          | 4143              | NON-PREGNANT | 11                                   | 2.89        | 30.76           | 4.65            | 8.46        | 3.4             |
| 3          | 4143              | NON-PREGNANT | 10                                   | 2.21        | 30.66           | 4.56            | 8.3         | 3.34            |
| 4          | 4143              | NON-PREGNANT | 11                                   | 3.67        | 29.27           | 4.58            | 8.35        | 3.36            |
| 5          | 4143              | NON-PREGNANT | 9                                    | 4.51        | 29.35           | 4.62            | 8.44        | 3.39            |
| 6          | 4143              | NON-PREGNANT | 8                                    | 2.53        | 31.41           | 4.7             | 8.55        | 3.43            |
| 7          | 4143              | NON-PREGNANT | 10                                   |             |                 |                 |             |                 |
| 8          | 4143              | NON-PREGNANT | 9                                    | 3.53        | 29.86           | 4.59            | 8.37        | 3.36            |
| 9          | 4143              | NON-PREGNANT | 11                                   | 4.11        | 30.89           | 4.8             | 8.75        | 3.5             |
| 10         | 4143              | NON-PREGNANT | 8                                    | 3.84        | 30.3            | 4.68            | 8.54        | 3.43            |

|    |      |                    |    |      |       |      |      |      |
|----|------|--------------------|----|------|-------|------|------|------|
| 11 | 4143 | NON-PREGNANT       | 7  | 3.8  | 30.54 | 4.71 | 8.6  | 3.45 |
| 12 | 4143 | NON-PREGNANT       | 10 | 4.01 | 29.97 | 4.66 | 8.49 | 3.41 |
| 13 | 4143 | FIRST INSEMINATION | 10 |      |       |      |      |      |
| 14 | 4143 | FIRST INSEMINATION | 9  |      |       |      |      |      |
| 15 | 4143 | FIRST INSEMINATION | 6  | 3.86 | 29.03 | 4.51 | 8.22 | 3.31 |
| 16 | 4143 | FIRST INSEMINATION | 5  | 4.27 | 29.41 | 4.6  | 8.4  | 3.37 |
| 17 | 4143 | FIRST INSEMINATION | 3  | 3.18 | 30.95 | 4.71 | 8.57 | 3.44 |
| 18 | 4143 | FIRST INSEMINATION | 6  | 3.3  | 30.18 | 4.61 | 8.4  | 3.37 |
| 19 | 4143 | FIRST INSEMINATION | 4  | 3.5  | 31.46 | 4.81 | 8.77 | 3.51 |
| 20 | 4143 | FIRST INSEMINATION | 5  | 3.73 | 31.16 | 4.79 | 8.74 | 3.5  |
| 21 | 4143 | FIRST INSEMINATION | 5  |      |       |      |      |      |
| 22 | 4143 | FIRST INSEMINATION | 10 |      |       |      |      |      |
| 23 | 4143 | FIRST INSEMINATION | 5  | 3.55 | 30.63 | 4.7  | 8.57 | 3.44 |
| 24 | 4143 | FIRST INSEMINATION | 4  | 3.65 | 29.7  | 4.58 | 8.35 | 3.36 |
| 25 | 4143 | FIRST INSEMINATION | 8  | 3.12 | 29.72 | 4.52 | 8.24 | 3.32 |
| 26 | 4143 | FIRST INSEMINATION | 7  | 3.89 | 29.69 | 4.6  | 8.39 | 3.37 |
| 27 | 4143 | FIRST INSEMINATION | 8  | 3.57 | 29.69 | 4.57 | 8.33 | 3.35 |
| 28 | 4143 | FIRST INSEMINATION | 7  |      |       |      |      |      |
| 29 | 4143 | FIRST INSEMINATION | 5  | 4.14 | 30.07 | 4.68 | 8.54 | 3.43 |
| 30 | 4143 | FIRST INSEMINATION | 7  | 3.7  | 30    | 4.63 | 8.43 | 3.39 |
| 31 | 4143 | FIRST INSEMINATION | 9  | 3.89 | 30.93 | 4.78 | 8.71 | 3.49 |
| 32 | 4143 | FIRST INSEMINATION | 5  | 3.85 | 29.5  | 4.57 | 8.34 | 3.35 |
| 33 | 4143 | FIRST INSEMINATION | 6  | 3.75 | 29.07 | 4.5  | 8.21 | 3.3  |
| 34 | 4143 | FIRST INSEMINATION | 11 | 3.47 | 29.75 | 4.57 | 8.32 | 3.35 |
| 35 | 4143 | FIRST INSEMINATION | 10 |      |       |      |      |      |
| 36 | 4143 | FIRST INSEMINATION | 10 |      |       |      |      |      |
| 37 | 4143 | FIRST INSEMINATION | 9  | 3.56 | 30.35 | 4.66 | 8.5  | 3.41 |

|    |      |                     |    |          |       |          |      |      |
|----|------|---------------------|----|----------|-------|----------|------|------|
| 38 | 4143 | SECOND INSEMINATION | 8  | 3.83     | 30.45 | 4.7      | 8.58 | 3.44 |
| 39 | 4143 | SECOND INSEMINATION | 7  | 3.71     | 30.44 | 4.69     | 8.55 | 3.43 |
| 40 | 4143 | SECOND INSEMINATION | 8  | 3.42     | 30.35 | 4.65     | 8.47 | 3.4  |
| 41 | 4143 | SECOND INSEMINATION | 8  | 4.23     | 30.38 | 4.74     | 8.64 | 3.46 |
| 42 | 4143 | SECOND INSEMINATION | 9  |          |       |          |      |      |
| 43 | 4143 | SECOND INSEMINATION | 9  | 3.8      | 30.5  | 4.71     | 8.58 | 3.44 |
| 44 | 4143 | SECOND INSEMINATION | 13 | 3.69     | 29.91 | 4.61     | 8.41 | 3.38 |
| 45 | 4143 | SECOND INSEMINATION | 11 | 3.87     | 30.18 | 4.67     | 8.52 | 3.42 |
| 46 | 4143 | SECOND INSEMINATION | 10 | 3.63     | 29.89 | 4.6      | 8.39 | 3.37 |
| 47 | 4143 | SECOND INSEMINATION | 10 | 3.7      | 29.62 | 4.57     | 8.34 | 3.35 |
| 48 | 4143 | SECOND INSEMINATION | 8  | 3.74     | 30.53 | 4.71     | 8.58 | 3.44 |
| 49 | 4143 | SECOND INSEMINATION |    |          |       |          |      |      |
| 50 | 4143 | SECOND INSEMINATION | 13 |          |       |          |      |      |
| 51 | 4143 | SECOND INSEMINATION | 13 | 3.95     | 30    | 4.65     | 8.49 | 3.41 |
| 52 | 4143 | SECOND INSEMINATION | 14 | 3.35     | 26.55 | 4.75     | 8.71 | 3.48 |
| 53 | 4143 | SECOND INSEMINATION | 16 | 3.36     | 29.47 | 4.51     | 8.23 | 3.31 |
| 54 | 4143 | SECOND INSEMINATION | 13 | 3.74     | 30.69 | 4.73     | 8.62 | 3.46 |
| 55 | 4143 | SECOND INSEMINATION | 14 | 4.13     | 29.79 | 4.64     | 8.47 | 3.4  |
| 56 | 4143 | SECOND INSEMINATION | 13 |          |       |          |      |      |
| 57 | 4143 | SECOND INSEMINATION | 10 | 3.63     | 29.52 | 4.55     | 8.3  | 3.34 |
| 58 | 4143 | SECOND INSEMINATION | 10 | 3.91     | 30.6  | 4.73     | 8.63 | 3.46 |
| 59 | 4143 | SECOND INSEMINATION | 10 | 4.10E+00 | 30.12 | 4.69E+00 | 8.55 | 3.43 |
| 60 | 4143 | SECOND INSEMINATION | 12 | 3.97E+00 | 29.84 | 4.63E+00 | 8.45 | 3.39 |
| 61 | 4143 | SECOND INSEMINATION | 12 | 3.51E+00 | 29.16 | 4.49     | 8.18 | 3.29 |
| 62 | 4143 | SECOND INSEMINATION | 11 | 3.86     | 29.57 | 4.58     | 8.36 | 3.36 |
| 63 | 4143 | SECOND INSEMINATION |    |          |       |          |      |      |
| 64 | 4143 | SECOND INSEMINATION | 12 | 5.29     | 29.25 | 4.69     | 8.57 | 3.43 |

|    |      |                     |    |      |       |      |      |     |
|----|------|---------------------|----|------|-------|------|------|-----|
| 65 | 4143 | SECOND INSEMINATION | 12 | 3.89 | 30.04 | 4.65 | 8.48 | 3.4 |
|----|------|---------------------|----|------|-------|------|------|-----|

**n = 8**

| Day | cow number | state        | weather temperature (Celsius) | Fat% | Density% | Lactose% | SNF% | Protein% |
|-----|------------|--------------|-------------------------------|------|----------|----------|------|----------|
| 1   | 4058       | NON-PREGNANT | 11                            | 2.89 | 30.6     | 4.62     | 8.42 | 3.38     |
| 2   | 4058       | NON-PREGNANT | 11                            | 2.7  | 30.67    | 4.61     | 8.4  | 3.38     |
| 3   | 4058       | NON-PREGNANT | 10                            | 5.11 | 29.68    | 4.73     | 8.64 | 3.46     |
| 4   | 4058       | NON-PREGNANT | 11                            | 4.36 | 29.26    | 4.59     | 8.38 | 3.37     |
| 5   | 4058       | NON-PREGNANT | 9                             | 4.03 | 29.99    | 4.66     | 8.5  | 3.41     |
| 6   | 4058       | NON-PREGNANT | 8                             | 3.8  | 30.52    | 4.71     | 8.59 | 3.44     |
| 7   | 4058       | NON-PREGNANT | 10                            |      |          |          |      |          |
| 8   | 4058       | NON-PREGNANT | 9                             | 4.32 | 30.39    | 4.75     | 8.66 | 3.47     |
| 9   | 4058       | NON-PREGNANT | 11                            | 4.04 | 30.32    | 4.71     | 8.59 | 3.44     |
| 10  | 4058       | NON-PREGNANT | 8                             | 3.96 | 30.66    | 4.75     | 8.66 | 3.47     |
| 11  | 4058       | NON-PREGNANT | 7                             | 3.85 | 30.25    | 4.68     | 8.53 | 3.42     |
| 12  | 4058       | NON-PREGNANT | 10                            | 3.52 | 30.21    | 4.64     | 8.45 | 3.39     |
| 13  | 4058       | NON-PREGNANT | 10                            | 3.91 | 30.01    | 4.65     | 8.48 | 3.4      |
| 14  | 4058       | NON-PREGNANT | 9                             |      |          |          |      |          |
| 15  | 4058       | NON-PREGNANT | 6                             | 3.68 | 30.12    | 4.64     | 8.46 | 3.4      |
| 16  | 4058       | NON-PREGNANT | 5                             | 4.28 | 30.02    | 4.69     | 8.56 | 3.43     |
| 17  | 4058       | NON-PREGNANT | 3                             | 4.18 | 30.83    | 4.8      | 8.75 | 3.5      |
| 18  | 4058       | NON-PREGNANT | 6                             | 3.93 | 30.36    | 4.7      | 8.58 | 3.44     |
| 19  | 4058       | NON-PREGNANT | 4                             | 3.93 | 30.22    | 4.68     | 8.54 | 3.42     |
| 20  | 4058       | NON-PREGNANT | 5                             | 4.84 | 30.33    | 4.8      | 8.75 | 3.5      |

|    |      |                    |    |      |       |      |      |      |
|----|------|--------------------|----|------|-------|------|------|------|
| 21 | 4058 | NON-PREGNANT       | 5  |      |       |      |      |      |
| 22 | 4058 | NON-PREGNANT       | 10 |      |       |      |      |      |
| 23 | 4058 | NON-PREGNANT       | 5  | 4.61 | 30.69 | 4.82 | 8.8  | 3.52 |
| 24 | 4058 | NON-PREGNANT       | 4  | 3.93 | 30.22 | 4.68 | 8.54 | 3.42 |
| 25 | 4058 | NON-PREGNANT       | 8  | 3.92 | 30.27 | 4.69 | 8.55 | 3.43 |
| 26 | 4058 | NON-PREGNANT       | 7  | 3.96 | 30.14 | 4.67 | 8.53 | 3.42 |
| 27 | 4058 | NON-PREGNANT       | 8  | 3.39 | 31.08 | 4.75 | 8.65 | 3.46 |
| 28 | 4058 | NON-PREGNANT       | 7  |      |       |      |      |      |
| 29 | 4058 | NON-PREGNANT       | 5  | 4.96 | 30.87 | 4.89 | 8.92 | 3.56 |
| 30 | 4058 | FIRST INSEMINATION | 7  | 4.71 | 30.44 | 4.8  | 8.76 | 3.5  |
| 31 | 4058 | FIRST INSEMINATION | 9  | 4.65 | 30.8  | 4.84 | 8.84 | 3.53 |
| 32 | 4058 | FIRST INSEMINATION | 5  | 4.41 | 29.79 | 4.67 | 8.53 | 3.42 |
| 33 | 4058 | FIRST INSEMINATION | 6  | 3.86 | 30.89 | 4.77 | 8.7  | 3.48 |
| 34 | 4058 | FIRST INSEMINATION | 11 | 4.27 | 31.05 | 4.84 | 8.82 | 3.53 |
| 35 | 4058 | FIRST INSEMINATION | 10 |      |       |      |      |      |
| 36 | 4058 | FIRST INSEMINATION | 10 | 3.84 | 30.14 | 4.66 | 8.5  | 3.41 |
| 37 | 4058 | FIRST INSEMINATION | 9  | 3.64 | 30.33 | 4.67 | 8.51 | 3.41 |
| 38 | 4058 | FIRST INSEMINATION | 8  | 4.09 | 30.4  | 4.73 | 8.62 | 3.45 |
| 39 | 4058 | FIRST INSEMINATION | 7  | 4.19 | 30.01 | 4.68 | 8.54 | 3.42 |
| 40 | 4058 | FIRST INSEMINATION | 8  | 4.47 | 30.29 | 4.75 | 8.67 | 3.47 |
| 41 | 4058 | FIRST INSEMINATION | 8  | 4.9  | 30.34 | 4.8  | 8.77 | 3.51 |
| 42 | 4058 | FIRST INSEMINATION | 9  |      |       |      |      |      |
| 43 | 4058 | FIRST INSEMINATION | 9  | 4.18 | 31.42 | 4.88 | 8.9  | 3.56 |
| 44 | 4058 | FIRST INSEMINATION | 13 | 4.02 | 31.45 | 4.87 | 8.87 | 3.55 |
| 45 | 4058 | FIRST INSEMINATION | 11 | 3.98 | 30.47 | 4.72 | 8.61 | 3.45 |
| 46 | 4058 | FIRST INSEMINATION | 10 | 4.08 | 30.08 | 4.68 | 8.53 | 3.42 |
| 47 | 4058 | FIRST INSEMINATION | 10 | 3.82 | 30.73 | 4.74 | 8.65 | 3.46 |

|    |      |                     |    |      |       |      |      |      |
|----|------|---------------------|----|------|-------|------|------|------|
| 48 | 4058 | FIRST INSEMINATION  | 8  | 3.99 | 30.79 | 4.77 | 8.7  | 3.48 |
| 49 | 4058 | FIRST INSEMINATION  |    |      |       |      |      |      |
| 50 | 4058 | FIRST INSEMINATION  | 13 |      |       |      |      |      |
| 51 | 4058 | FIRST INSEMINATION  | 13 | 4.16 | 31.21 | 4.85 | 8.84 | 3.54 |
| 52 | 4058 | SECOND INSEMINATION | 14 | 3.47 | 30.81 | 4.72 | 8.6  | 3.45 |
| 53 | 4058 | SECOND INSEMINATION | 16 | 4.19 | 30.5  | 4.75 | 8.67 | 3.47 |
| 54 | 4058 | SECOND INSEMINATION | 13 | 4.48 | 30.97 | 4.85 | 8.85 | 3.54 |
| 55 | 4058 | SECOND INSEMINATION | 14 | 4.89 | 30.06 | 4.76 | 8.7  | 3.48 |
| 56 | 4058 | SECOND INSEMINATION | 13 |      |       |      |      |      |
| 57 | 4058 | SECOND INSEMINATION | 10 | 4.21 | 30.17 | 4.71 | 8.58 | 3.44 |
| 58 | 4058 | SECOND INSEMINATION | 10 | 4.06 | 30.45 | 4.73 | 8.63 | 3.46 |
| 59 | 4058 | SECOND INSEMINATION | 10 | 6.49 | 30.15 | 4.95 | 9.05 | 3.61 |
| 60 | 4058 | SECOND INSEMINATION | 12 | 4.1  | 30.12 | 4.69 | 8.55 | 3.43 |
| 61 | 4058 | SECOND INSEMINATION | 12 | 3.71 | 30.02 | 4.63 | 8.44 | 3.39 |
| 62 | 4058 | SECOND INSEMINATION | 11 | 3.83 | 30.82 | 4.76 | 8.67 | 3.47 |
| 63 | 4058 | SECOND INSEMINATION |    |      |       |      |      |      |
| 64 | 4058 | SECOND INSEMINATION | 12 | 4.48 | 31    | 4.85 | 8.85 | 3.54 |
| 65 | 4058 | SECOND INSEMINATION | 12 | 4.31 | 30.53 | 4.77 | 8.7  | 3.48 |

**n = 9**

| <b>Day</b> | <b>cow number</b> | <b>state</b> | <b>weather temperature (Celsius)</b> | <b>FAT%</b> | <b>Density%</b> | <b>Lactose%</b> | <b>SNF%</b> | <b>Protein%</b> |
|------------|-------------------|--------------|--------------------------------------|-------------|-----------------|-----------------|-------------|-----------------|
| 1          | 4169              | NON-PREGNANT | 11                                   | 1.97        | 29.36           | 4.35            | 7.92        | 3.2             |
| 2          | 4169              | NON-PREGNANT | 11                                   | 3.51        | 29.37           | 4.52            | 8.24        | 3.31            |
| 3          | 4169              | NON-PREGNANT | 10                                   | 3.08        | 29.51           | 4.49            | 8.18        | 3.29            |



|    |      |              |    |      |       |      |      |      |
|----|------|--------------|----|------|-------|------|------|------|
| 4  | 4169 | NON-PREGNANT | 11 | 3.16 | 27.25 | 4.18 | 7.69 | 3.09 |
| 5  | 4169 | NON-PREGNANT | 9  | 3.16 | 27.25 | 4.18 | 7.69 | 3.09 |
| 6  | 4169 | NON-PREGNANT | 8  | 2.72 | 28.8  | 4.35 | 7.93 | 3.2  |
| 7  | 4169 | NON-PREGNANT | 10 |      |       |      |      |      |
| 8  | 4169 | NON-PREGNANT | 9  | 3.93 | 28.29 | 4.41 | 8.05 | 3.24 |
| 9  | 4169 | NON-PREGNANT | 11 | 2.64 | 29.04 | 4.38 | 7.97 | 3.22 |
| 10 | 4169 | NON-PREGNANT | 8  | 4.02 | 29.01 | 4.52 | 8.25 | 3.32 |
| 11 | 4169 | NON-PREGNANT | 7  |      |       |      |      |      |
| 12 | 4169 | NON-PREGNANT | 10 | 3.03 | 28.84 | 4.39 | 8    | 3.23 |
| 13 | 4169 | NON-PREGNANT | 10 | 3.41 | 29.18 | 4.45 | 8.11 | 3.27 |
| 14 | 4169 | NON-PREGNANT | 9  |      |       |      |      |      |
| 15 | 4169 | NON-PREGNANT | 6  | 2.8  | 29.13 | 4.41 | 8.03 | 3.24 |
| 16 | 4169 | NON-PREGNANT | 5  | 2.55 | 29.34 | 4.41 | 8.03 | 3.24 |
| 17 | 4169 | NON-PREGNANT | 3  | 2.73 | 29.99 | 4.52 | 8.23 | 3.31 |
| 18 | 4169 | NON-PREGNANT | 6  | 1.85 | 29.7  | 4.4  | 8    | 3.23 |
| 19 | 4169 | NON-PREGNANT | 4  | 2.19 | 29.02 | 4.4  | 8.02 | 3.24 |
| 20 | 4169 | NON-PREGNANT | 5  | 3.33 | 29.78 | 4.55 | 8.3  | 3.34 |
| 21 | 4169 | NON-PREGNANT | 5  |      |       |      |      |      |
| 22 | 4169 | NON-PREGNANT | 10 |      |       |      |      |      |
| 23 | 4169 | NON-PREGNANT | 5  | 3.01 | 29.76 | 4.52 | 8.23 | 3.31 |
| 24 | 4169 | NON-PREGNANT | 4  | 3.54 | 29.79 | 4.58 | 8.35 | 3.36 |
| 25 | 4169 | NON-PREGNANT | 8  | 2.93 | 29.61 | 4.49 | 8.18 | 3.29 |
| 26 | 4169 | NON-PREGNANT | 7  | 3.59 | 29.1  | 4.49 | 8.18 | 3.29 |
| 27 | 4169 | NON-PREGNANT | 8  | 2.2  | 29.25 | 4.36 | 7.94 | 3.21 |
| 28 | 4169 | NON-PREGNANT | 7  |      |       |      |      |      |
| 29 | 4169 | NON-PREGNANT | 5  | 3.08 | 28.5  | 4.35 | 7.93 | 3.2  |
| 30 | 4169 | NON-PREGNANT | 7  | 2.56 | 28.47 | 4.29 | 7.81 | 3.16 |

|    |      |                    |    |      |       |      |      |      |
|----|------|--------------------|----|------|-------|------|------|------|
| 31 | 4169 | NON-PREGNANT       | 9  | 2.68 | 28.38 | 4.29 | 7.81 | 3.16 |
| 32 | 4169 | NON-PREGNANT       | 5  | 3.22 | 28.53 | 4.37 | 7.96 | 3.21 |
| 33 | 4169 | NON-PREGNANT       | 6  | 2.71 | 29.29 | 4.42 | 8.06 | 3.25 |
| 34 | 4169 | NON-PREGNANT       | 11 | 2.87 | 30.53 | 4.61 | 8.4  | 3.38 |
| 35 | 4169 | NON-PREGNANT       | 10 |      |       |      |      |      |
| 36 | 4169 | NON-PREGNANT       | 10 | 3.47 | 27.59 | 4.26 | 7.77 | 3.14 |
| 37 | 4169 | NON-PREGNANT       | 9  | 2.6  | 28.84 | 4.34 | 7.91 | 3.2  |
| 38 | 4169 | NON-PREGNANT       | 8  | 2.44 | 28.82 | 4.32 | 7.87 | 3.18 |
| 39 | 4169 | NON-PREGNANT       | 7  | 3.45 | 28.63 | 4.41 | 8.03 | 3.24 |
| 40 | 4169 | NON-PREGNANT       | 8  | 3.2  | 28.72 | 4.39 | 8    | 3.23 |
| 41 | 4169 | FIRST INSEMINATION | 8  | 2.55 | 32.48 | 4.85 | 8.83 | 3.53 |
| 42 | 4169 | FIRST INSEMINATION | 9  |      |       |      |      |      |
| 43 | 4169 | FIRST INSEMINATION | 9  | 2.57 | 29.85 | 4.48 | 8.17 | 3.29 |
| 44 | 4169 | FIRST INSEMINATION | 13 | 2.45 | 29.68 | 4.45 | 8.1  | 3.26 |
| 45 | 4169 | FIRST INSEMINATION | 11 | 2.61 | 30.06 | 4.52 | 8.23 | 3.31 |
| 46 | 4169 | FIRST INSEMINATION | 10 | 4.62 | 27.92 | 4.43 | 8.09 | 3.26 |
| 47 | 4169 | FIRST INSEMINATION | 10 | 2.54 | 30    | 4.5  | 8.2  | 3.3  |
| 48 | 4169 | FIRST INSEMINATION | 8  | 3.2  | 30.5  | 4.58 | 8.35 | 3.35 |
| 49 | 4169 | FIRST INSEMINATION |    |      |       |      |      |      |
| 50 | 4169 | FIRST INSEMINATION | 13 |      |       |      |      |      |
| 51 | 4169 | FIRST INSEMINATION | 13 | 2.54 | 29.22 | 4.39 | 8    | 3.23 |
| 52 | 4169 | FIRST INSEMINATION | 14 | 2.24 | 30.05 | 4.48 | 8.15 | 3.28 |
| 53 | 4169 | FIRST INSEMINATION | 16 | 2.97 | 28.68 | 4.36 | 7.95 | 3.21 |
| 54 | 4169 | FIRST INSEMINATION | 13 | 2.28 | 29.8  | 4.45 | 8.09 | 3.26 |
| 55 | 4169 | FIRST INSEMINATION | 14 | 2.85 | 29.27 | 4.43 | 8.07 | 3.25 |
| 56 | 4169 | FIRST INSEMINATION | 13 |      |       |      |      |      |
| 57 | 4169 | FIRST INSEMINATION | 10 | 3.15 | 28.47 | 4.35 | 7.93 | 3.2  |

|    |      |                    |    |      |       |      |      |      |  |
|----|------|--------------------|----|------|-------|------|------|------|--|
| 58 | 4169 | FIRST INSEMINATION | 10 | 2.85 | 29.27 | 4.43 | 8.07 | 3.25 |  |
| 59 | 4169 | FIRST INSEMINATION | 10 | 3.06 | 30.29 | 4.6  | 8.38 | 3.37 |  |
| 60 | 4169 | FIRST INSEMINATION | 12 | 2.35 | 29.16 | 4.36 | 7.94 | 3.21 |  |
| 61 | 4169 | FIRST INSEMINATION | 12 | 3.02 | 29.33 | 4.46 | 8.13 | 3.27 |  |
| 62 | 4169 | FIRST INSEMINATION | 11 | 2.27 | 29.9  | 4.46 | 8.12 | 3.27 |  |
| 63 | 4169 | FIRST INSEMINATION |    |      |       |      |      |      |  |
| 64 | 4169 | FIRST INSEMINATION | 12 | 2.76 | 29.38 | 4.44 | 8.08 | 3.26 |  |
| 65 | 4169 | FIRST INSEMINATION | 12 | 2.83 | 29.46 | 4.46 | 8.12 | 3.27 |  |

**n = 10**

| Day | cow number | state        | weather temperature (Celsius) | FAT% | Density% | Lactose% | SNF% | Protein% |
|-----|------------|--------------|-------------------------------|------|----------|----------|------|----------|
| 1   | 4282       | NON-PREGNANT | 11                            | 2.83 | 28.31    | 4.29     | 7.82 | 3.16     |
| 2   | 4282       | NON-PREGNANT | 11                            | 2.78 | 28.74    | 4.35     | 7.92 | 3.2      |
| 3   | 4282       | NON-PREGNANT | 10                            | 4.02 | 29.31    | 4.56     | 8.33 | 3.35     |
| 4   | 4282       | NON-PREGNANT | 11                            | 2.73 | 29.5     | 4.45     | 8.11 | 3.27     |
| 5   | 4282       | NON-PREGNANT | 9                             | 4.44 | 29.45    | 4.63     | 8.45 | 3.39     |
| 6   | 4282       | NON-PREGNANT | 8                             | 3.01 | 28.68    | 4.37     | 7.96 | 3.21     |
| 7   | 4282       | NON-PREGNANT | 10                            |      |          |          |      |          |
| 8   | 4282       | NON-PREGNANT | 9                             | 2.41 | 28.21    | 4.24     | 7.71 | 3.12     |
| 9   | 4282       | NON-PREGNANT | 11                            | 2.73 | 29.07    | 4.39     | 8    | 3.23     |
| 10  | 4282       | NON-PREGNANT | 8                             | 3.39 | 28.57    | 4.39     | 7.98 | 3.22     |
| 11  | 4282       | NON-PREGNANT | 7                             | 2.64 | 29.02    | 4.37     | 7.97 | 3.22     |
| 12  | 4282       | NON-PREGNANT | 10                            | 3.85 | 28.33    | 4.41     | 8.04 | 3.24     |
| 13  | 4282       | NON-PREGNANT | 10                            |      |          |          |      |          |

|    |      |                     |    |      |       |      |      |      |
|----|------|---------------------|----|------|-------|------|------|------|
| 14 | 4282 | NON-PREGNANT        | 9  |      |       |      |      |      |
| 15 | 4282 | NON-PREGNANT        | 6  | 4.38 | 27.94 | 4.41 | 8.05 | 3.24 |
| 16 | 4282 | NON-PREGNANT        | 5  | 3.72 | 28.61 | 4.43 | 8.08 | 3.26 |
| 17 | 4282 | FIRST INSEMINATION  | 3  | 1.72 | 29.36 | 4.32 | 7.86 | 3.18 |
| 18 | 4282 | FIRST INSEMINATION  | 6  |      |       |      |      |      |
| 19 | 4282 | FIRST INSEMINATION  | 4  | 4.49 | 28.84 | 4.55 | 8.3  | 3.34 |
| 20 | 4282 | FIRST INSEMINATION  | 5  | 3.51 | 29.56 | 4.54 | 8.28 | 3.33 |
| 21 | 4282 | FIRST INSEMINATION  | 5  |      |       |      |      |      |
| 22 | 4282 | FIRST INSEMINATION  | 10 |      |       |      |      |      |
| 23 | 4282 | FIRST INSEMINATION  | 5  | 2.69 | 29.25 | 4.41 | 8.04 | 3.24 |
| 24 | 4282 | FIRST INSEMINATION  | 4  | 3.11 | 30.37 | 4.62 | 8.41 | 3.38 |
| 25 | 4282 | FIRST INSEMINATION  | 8  | 2.76 | 29.4  | 4.44 | 8.09 | 3.26 |
| 26 | 4282 | FIRST INSEMINATION  | 7  | 2.77 | 28.74 | 4.35 | 7.92 | 3.2  |
| 27 | 4282 | FIRST INSEMINATION  | 8  | 2.69 | 28.75 | 4.34 | 7.91 | 3.19 |
| 28 | 4282 | FIRST INSEMINATION  | 7  |      |       |      |      |      |
| 29 | 4282 | FIRST INSEMINATION  | 5  | 3.08 | 29.89 | 4.54 | 8.28 | 3.33 |
| 30 | 4282 | FIRST INSEMINATION  | 7  | 3.49 | 28.41 | 4.38 | 7.99 | 3.22 |
| 31 | 4282 | FIRST INSEMINATION  | 9  | 3.52 | 30.33 | 4.65 | 8.48 | 3.4  |
| 32 | 4282 | FIRST INSEMINATION  | 5  | 3.32 | 28.53 | 4.38 | 7.98 | 3.22 |
| 33 | 4282 | FIRST INSEMINATION  | 6  | 3.29 | 28.84 | 4.42 | 8.05 | 3.25 |
| 34 | 4282 | FIRST INSEMINATION  | 11 | 2.96 | 30.26 | 4.58 | 8.35 | 3.36 |
| 35 | 4282 | FIRST INSEMINATION  | 10 |      |       |      |      |      |
| 36 | 4282 | FIRST INSEMINATION  | 10 | 3.1  | 29.51 | 4.49 | 8.19 | 3.3  |
| 37 | 4282 | FIRST INSEMINATION  | 9  | 3.45 | 29.19 | 4.49 | 8.18 | 3.29 |
| 38 | 4282 | FIRST INSEMINATION  | 8  | 3.43 | 30.11 | 4.61 | 8.41 | 3.38 |
| 39 | 4282 | SECOND INSEMINATION | 7  | 4.8  | 28.62 | 4.55 | 8.31 | 3.34 |
| 40 | 4282 | SECOND INSEMINATION | 8  | 3.32 | 28.93 | 4.43 | 8.08 | 3.26 |

|    |      |                     |    |      |       |      |      |      |
|----|------|---------------------|----|------|-------|------|------|------|
| 41 | 4282 | SECOND INSEMINATION | 8  | 3.43 | 29.57 | 4.54 | 8.27 | 3.33 |
| 42 | 4282 | SECOND INSEMINATION | 9  |      |       |      |      |      |
| 43 | 4282 | SECOND INSEMINATION | 9  | 3.18 | 28.93 | 4.42 | 8.06 | 3.25 |
| 44 | 4282 | SECOND INSEMINATION | 13 | 3.15 | 29.43 | 4.49 | 8.18 | 3.29 |
| 45 | 4282 | SECOND INSEMINATION | 11 | 3.11 | 29.36 | 4.47 | 8.15 | 3.28 |
| 46 | 4282 | SECOND INSEMINATION | 10 | 3.11 | 28.69 | 4.38 | 7.98 | 3.22 |
| 47 | 4282 | SECOND INSEMINATION | 10 | 2.89 | 29.82 | 4.51 | 8.22 | 3.31 |
| 48 | 4282 | SECOND INSEMINATION | 8  | 2.83 | 28.73 | 4.35 | 7.93 | 3.2  |
| 49 | 4282 | SECOND INSEMINATION |    |      |       |      |      |      |
| 50 | 4282 | SECOND INSEMINATION | 13 |      |       |      |      |      |
| 51 | 4282 | SECOND INSEMINATION | 13 | 2.87 | 29.05 | 4.4  | 8.02 | 3.24 |
| 52 | 4282 | SECOND INSEMINATION | 14 | 3.02 | 29.15 | 4.43 | 8.08 | 3.26 |
| 53 | 4282 | SECOND INSEMINATION | 16 | 3.02 | 28.96 | 4.41 | 8.03 | 3.24 |
| 54 | 4282 | SECOND INSEMINATION | 13 | 3.43 | 29.17 | 4.48 | 8.17 | 3.29 |
| 55 | 4282 | SECOND INSEMINATION | 14 | 3.29 | 28.98 | 4.44 | 8.09 | 3.26 |
| 56 | 4282 | SECOND INSEMINATION | 13 |      |       |      |      |      |
| 57 | 4282 | SECOND INSEMINATION | 10 | 3.45 | 28.16 | 4.34 | 7.91 | 3.2  |
| 58 | 4282 | SECOND INSEMINATION | 10 | 2.49 | 30.08 | 4.51 | 8.21 | 3.3  |
| 59 | 4282 | SECOND INSEMINATION | 10 | 3.41 | 29.15 | 4.48 | 8.16 | 3.29 |
| 60 | 4282 | SECOND INSEMINATION | 12 | 4.09 | 28.1  | 4.4  | 8.03 | 3.24 |
| 61 | 4282 | SECOND INSEMINATION | 12 | 0.65 | 29.39 | 4.21 | 7.65 | 3.1  |
| 62 | 4282 | SECOND INSEMINATION | 11 | 3.53 | 29.11 | 4.48 | 8.17 | 3.29 |
| 63 | 4282 | SECOND INSEMINATION |    |      |       |      |      |      |
| 64 | 4282 | SECOND INSEMINATION | 12 | 3.4  | 29.48 | 4.52 | 8.24 | 3.32 |
| 65 | 4282 | SECOND INSEMINATION | 12 | 3.36 | 30.24 | 4.62 | 8.43 | 3.38 |

**Table S2B:** Microwave Dielectric fitting parameters (Cole-Cole: dielectric strength-  $\Delta\epsilon$ , relaxation time  $\tau(s)$ , broadening parameter- $\alpha$ , and conductivity- $\sigma$ (Siemens/m) measured weekly for 10 different cows at different reproductive states (Non-pregnant-NP, during inseminations and during confirmed pregnancy). The not measured days correspond mostly to Saturdays ,an official holiday in Israel.

**n = 1**

| Day | cow number | state                       | $\Delta\epsilon$ | $\tau$ (s) | $\alpha$ | $\sigma$ (S/m) |
|-----|------------|-----------------------------|------------------|------------|----------|----------------|
| 1   | 4165       | NON-PREGNANT                | 61.02            | 8.12E-12   | 0.95     | 0.47           |
| 2   | 4165       | NON-PREGNANT                | 61.46            | 8.19E-12   | 0.97     | 0.52           |
| 3   | 4165       | NON-PREGNANT                | 63.23            | 8.27E-12   | 0.96     | 0.52           |
| 4   | 4165       | NON-PREGNANT                | 60.48            | 8.7E-12    | 0.98     | 0.47           |
| 5   | 4165       | NON-PREGNANT                | 60.40            | 8.25E-12   | 0.98     | 0.45           |
| 6   | 4165       | FIRST INSEMINATION/PREGNANT | 61.23            | 8.54E-12   | 0.96     | 0.45           |
| 7   | 4165       | FIRST INSEMINATION/PREGNANT |                  |            |          |                |
| 8   | 4165       | FIRST INSEMINATION/PREGNANT | 60.67            | 7.94E-12   | 0.97     | 0.45           |
| 9   | 4165       | FIRST INSEMINATION/PREGNANT |                  |            |          |                |
| 10  | 4165       | FIRST INSEMINATION/PREGNANT | 58.89            | 7.21E-12   | 0.99     | 0.35           |
| 11  | 4165       | FIRST INSEMINATION/PREGNANT | 60.51            | 7.82E-12   | 0.98     | 0.43           |
| 12  | 4165       | FIRST INSEMINATION/PREGNANT | 60.60            | 8.07E-12   | 0.98     | 0.44           |
| 13  | 4165       | FIRST INSEMINATION/PREGNANT | 62.00            | 8.39E-12   | 0.97     | 0.46           |
| 14  | 4165       | FIRST INSEMINATION/PREGNANT |                  |            |          |                |
| 15  | 4165       | FIRST INSEMINATION/PREGNANT | 60.57            | 8.12E-12   | 0.98     | 0.43           |
| 16  | 4165       | FIRST INSEMINATION/PREGNANT | 61.41            | 8.82E-12   | 0.97     | 0.45           |
| 17  | 4165       | FIRST INSEMINATION/PREGNANT | 57.96            | 7.2E-12    | 1.00     | 0.35           |
| 18  | 4165       | FIRST INSEMINATION/PREGNANT | 60.03            | 7.3E-12    | 0.99     | 0.41           |
| 19  | 4165       | FIRST INSEMINATION/PREGNANT | 59.36            | 7.78E-12   | 0.98     | 0.42           |
| 20  | 4165       | FIRST INSEMINATION/PREGNANT | 60.04            | 8.56E-12   | 0.98     | 0.44           |

|    |      |                             |       |          |      |      |
|----|------|-----------------------------|-------|----------|------|------|
| 21 | 4165 | FIRST INSEMINATION/PREGNANT |       |          |      |      |
| 22 | 4165 | FIRST INSEMINATION/PREGNANT |       |          |      |      |
| 23 | 4165 | FIRST INSEMINATION/PREGNANT | 60.45 | 8.8E-12  | 0.98 | 0.47 |
| 24 | 4165 | FIRST INSEMINATION/PREGNANT | 59.79 | 8.93E-12 | 0.98 | 0.47 |
| 25 | 4165 | FIRST INSEMINATION/PREGNANT | 59.77 | 9.09E-12 | 0.98 | 0.45 |
| 26 | 4165 | FIRST INSEMINATION/PREGNANT | 59.25 | 8.97E-12 | 0.98 | 0.45 |
| 27 | 4165 | FIRST INSEMINATION/PREGNANT | 60.26 | 8.81E-12 | 0.98 | 0.44 |
| 28 | 4165 | FIRST INSEMINATION/PREGNANT |       |          |      |      |
| 29 | 4165 | FIRST INSEMINATION/PREGNANT | 58.95 | 7.34E-12 | 0.98 | 0.39 |
| 30 | 4165 | FIRST INSEMINATION/PREGNANT | 60.26 | 8.01E-12 | 0.97 | 0.38 |
| 31 | 4165 | FIRST INSEMINATION/PREGNANT | 59.06 | 8.18E-12 | 0.98 | 0.43 |
| 32 | 4165 | FIRST INSEMINATION/PREGNANT | 58.80 | 7.98E-12 | 0.98 | 0.42 |
| 33 | 4165 | FIRST INSEMINATION/PREGNANT | 59.87 | 7.87E-12 | 0.98 | 0.43 |
| 34 | 4165 | FIRST INSEMINATION/PREGNANT | 60.20 | 7.91E-12 | 0.98 | 0.42 |
| 35 | 4165 | FIRST INSEMINATION/PREGNANT |       |          |      |      |
| 36 | 4165 | FIRST INSEMINATION/PREGNANT | 63.03 | 9.21E-12 | 0.98 | 0.42 |
| 37 | 4165 | FIRST INSEMINATION/PREGNANT | 60.68 | 9.11E-12 | 0.97 | 0.47 |
| 38 | 4165 | FIRST INSEMINATION/PREGNANT | 60.03 | 9.21E-12 | 0.97 | 0.46 |
| 39 | 4165 | FIRST INSEMINATION/PREGNANT | 60.94 | 9.27E-12 | 0.97 | 0.46 |
| 40 | 4165 | FIRST INSEMINATION/PREGNANT | 61.55 | 9.11E-12 | 0.97 | 0.47 |
| 41 | 4165 | FIRST INSEMINATION/PREGNANT | 59.62 | 9.06E-12 | 0.97 | 0.46 |
| 42 | 4165 | FIRST INSEMINATION/PREGNANT |       |          |      |      |
| 43 | 4165 | FIRST INSEMINATION/PREGNANT | 60.54 | 9.5E-12  | 0.97 | 0.46 |
| 44 | 4165 | FIRST INSEMINATION/PREGNANT |       |          |      |      |
| 45 | 4165 | FIRST INSEMINATION/PREGNANT | 60.47 | 8.94E-12 | 0.97 | 0.48 |
| 46 | 4165 | FIRST INSEMINATION/PREGNANT | 60.61 | 9.01E-12 | 0.97 | 0.48 |

|    |      |                             |       |          |      |      |
|----|------|-----------------------------|-------|----------|------|------|
| 47 | 4165 | FIRST INSEMINATION/PREGNANT | 60.99 | 8.99E-12 | 0.96 | 0.48 |
| 48 | 4165 | FIRST INSEMINATION/PREGNANT | 61.53 | 8.31E-12 | 0.97 | 0.44 |
| 49 | 4165 | FIRST INSEMINATION/PREGNANT |       |          |      |      |
| 50 | 4165 | FIRST INSEMINATION/PREGNANT |       |          |      |      |
| 51 | 4165 | FIRST INSEMINATION/PREGNANT | 59.41 | 8.62E-12 | 0.98 | 0.46 |
| 52 | 4165 | FIRST INSEMINATION/PREGNANT | 58.38 | 8.76E-12 | 0.98 | 0.46 |
| 53 | 4165 | FIRST INSEMINATION/PREGNANT | 59.94 | 8.73E-12 | 0.97 | 0.47 |
| 54 | 4165 | FIRST INSEMINATION/PREGNANT | 59.97 | 8.72E-12 | 0.97 | 0.45 |
| 55 | 4165 | FIRST INSEMINATION/PREGNANT | 60.15 | 8.93E-12 | 0.97 | 0.45 |
| 56 | 4165 | FIRST INSEMINATION/PREGNANT |       |          |      |      |
| 57 | 4165 | FIRST INSEMINATION/PREGNANT | 59.97 | 8.87E-12 | 0.97 | 0.46 |
| 58 | 4165 | FIRST INSEMINATION/PREGNANT | 60.68 | 8.77E-12 | 0.97 | 0.46 |
| 59 | 4165 | FIRST INSEMINATION/PREGNANT | 59.13 | 8.67E-12 | 0.97 | 0.47 |
| 60 | 4165 | FIRST INSEMINATION/PREGNANT | 60.11 | 8.66E-12 | 0.97 | 0.47 |
| 61 | 4165 | FIRST INSEMINATION/PREGNANT | 60.32 | 8.52E-12 | 0.98 | 0.48 |
| 62 | 4165 | FIRST INSEMINATION/PREGNANT | 58.89 | 8.59E-12 | 0.98 | 0.46 |
| 63 | 4165 | FIRST INSEMINATION/PREGNANT |       |          |      |      |
| 64 | 4165 | FIRST INSEMINATION/PREGNANT | 60.00 | 8.59E-12 | 0.97 | 0.49 |
| 65 | 4165 | FIRST INSEMINATION/PREGNANT | 60.09 | 8.62E-12 | 0.98 | 0.48 |

**n = 2**

| <b>Day</b> | <b>cow number</b> | <b>state</b> | <b><math>\Delta\epsilon</math></b> | <b><math>\tau</math> (s)</b> | <b><math>\alpha</math></b> | <b><math>\sigma</math> (S/m)</b> |
|------------|-------------------|--------------|------------------------------------|------------------------------|----------------------------|----------------------------------|
| 1          | 4151              | NON-PREGNANT | 60.15                              | 8.21E-12                     | 0.95                       | 0.44                             |
| 2          | 4151              | NON-PREGNANT | 57.64                              | 8.11E-12                     | 0.98                       | 0.44                             |



|    |      |                             |       |          |      |      |
|----|------|-----------------------------|-------|----------|------|------|
| 3  | 4151 | NON-PREGNANT                | 63.35 | 8.12E-12 | 0.96 | 0.43 |
| 4  | 4151 | NON-PREGNANT                | 54.81 | 8.64E-12 | 0.98 | 0.38 |
| 5  | 4151 | NON-PREGNANT                | 57.87 | 8.2E-12  | 0.98 | 0.39 |
| 6  | 4151 | NON-PREGNANT                | 61.39 | 8.54E-12 | 0.96 | 0.46 |
| 7  | 4151 | NON-PREGNANT                |       |          |      |      |
| 8  | 4151 | NON-PREGNANT                | 58.54 | 8.15E-12 | 0.97 | 0.39 |
| 9  | 4151 | NON-PREGNANT                | 58.74 | 8.56E-12 | 0.97 | 0.38 |
| 10 | 4151 | NON-PREGNANT                | 56.48 | 7.08E-12 | 0.99 | 0.29 |
| 11 | 4151 | NON-PREGNANT                | 54.59 | 8.24E-12 | 0.97 | 0.35 |
| 12 | 4151 | NON-PREGNANT                | 59.04 | 8.26E-12 | 0.98 | 0.40 |
| 13 | 4151 | NON-PREGNANT                | 59.39 | 8.45E-12 | 0.97 | 0.41 |
| 14 | 4151 | NON-PREGNANT                |       |          |      |      |
| 15 | 4151 | FIRST INSEMINATION/PREGNANT | 56.10 | 8.31E-12 | 0.98 | 0.33 |
| 16 | 4151 | FIRST INSEMINATION/PREGNANT | 58.37 | 8.99E-12 | 0.97 | 0.38 |
| 17 | 4151 | FIRST INSEMINATION/PREGNANT | 53.08 | 7.14E-12 | 1.00 | 0.32 |
| 18 | 4151 | FIRST INSEMINATION/PREGNANT | 58.05 | 7.53E-12 | 0.99 | 0.35 |
| 19 | 4151 | FIRST INSEMINATION/PREGNANT | 57.93 | 7.86E-12 | 0.98 | 0.34 |
| 20 | 4151 | FIRST INSEMINATION/PREGNANT | 58.10 | 8.58E-12 | 0.98 | 0.39 |
| 21 | 4151 | FIRST INSEMINATION/PREGNANT |       |          |      |      |
| 22 | 4151 | FIRST INSEMINATION/PREGNANT |       |          |      |      |
| 23 | 4151 | FIRST INSEMINATION/PREGNANT | 60.20 | 8.73E-12 | 0.97 | 0.41 |
| 24 | 4151 | FIRST INSEMINATION/PREGNANT | 57.07 | 9.2E-12  | 0.98 | 0.37 |
| 25 | 4151 | FIRST INSEMINATION/PREGNANT | 58.97 | 8.93E-12 | 0.98 | 0.41 |
| 26 | 4151 | FIRST INSEMINATION/PREGNANT | 58.07 | 8.91E-12 | 0.98 | 0.40 |
| 27 | 4151 | FIRST INSEMINATION/PREGNANT | 59.50 | 8.79E-12 | 0.98 | 0.40 |
| 28 | 4151 | FIRST INSEMINATION/PREGNANT |       |          |      |      |

|    |      |                             |       |          |      |      |
|----|------|-----------------------------|-------|----------|------|------|
| 29 | 4151 | FIRST INSEMINATION/PREGNANT | 60.67 | 7.22E-12 | 0.99 | 0.30 |
| 30 | 4151 | FIRST INSEMINATION/PREGNANT | 60.52 | 9.23E-12 | 0.95 | 0.35 |
| 31 | 4151 | FIRST INSEMINATION/PREGNANT | 58.44 | 8.37E-12 | 0.97 | 0.38 |
| 32 | 4151 | FIRST INSEMINATION/PREGNANT | 58.08 | 7.93E-12 | 0.98 | 0.37 |
| 33 | 4151 | FIRST INSEMINATION/PREGNANT |       |          |      |      |
| 34 | 4151 | FIRST INSEMINATION/PREGNANT | 59.97 | 7.97E-12 | 0.98 | 0.39 |
| 35 | 4151 | FIRST INSEMINATION/PREGNANT |       |          |      |      |
| 36 | 4151 | FIRST INSEMINATION/PREGNANT | 60.74 | 9.08E-12 | 0.96 | 0.44 |
| 37 | 4151 | FIRST INSEMINATION/PREGNANT | 59.79 | 8.99E-12 | 0.97 | 0.42 |
| 38 | 4151 | FIRST INSEMINATION/PREGNANT | 57.42 | 9.16E-12 | 0.97 | 0.39 |
| 39 | 4151 | FIRST INSEMINATION/PREGNANT | 59.33 | 9.3E-12  | 0.97 | 0.42 |
| 40 | 4151 | FIRST INSEMINATION/PREGNANT | 59.23 | 9.09E-12 | 0.97 | 0.43 |
| 41 | 4151 | FIRST INSEMINATION/PREGNANT | 58.00 | 9.09E-12 | 0.97 | 0.41 |
| 42 | 4151 | FIRST INSEMINATION/PREGNANT |       |          |      |      |
| 43 | 4151 | FIRST INSEMINATION/PREGNANT | 58.63 | 9.19E-12 | 0.97 | 0.40 |
| 44 | 4151 | FIRST INSEMINATION/PREGNANT |       |          |      |      |
| 45 | 4151 | FIRST INSEMINATION/PREGNANT | 59.40 | 9.07E-12 | 0.96 | 0.41 |
| 46 | 4151 | FIRST INSEMINATION/PREGNANT | 61.11 | 9.03E-12 | 0.96 | 0.44 |
| 47 | 4151 | FIRST INSEMINATION/PREGNANT | 57.87 | 9.18E-12 | 0.97 | 0.42 |
| 48 | 4151 | FIRST INSEMINATION/PREGNANT | 59.63 | 8.21E-12 | 0.97 | 0.41 |
| 49 | 4151 | FIRST INSEMINATION/PREGNANT |       |          |      |      |
| 50 | 4151 | FIRST INSEMINATION/PREGNANT |       |          |      |      |
| 51 | 4151 | FIRST INSEMINATION/PREGNANT | 60.37 | 8.45E-12 | 0.97 | 0.44 |
| 52 | 4151 | FIRST INSEMINATION/PREGNANT | 58.87 | 8.65E-12 | 0.98 | 0.41 |
| 53 | 4151 | FIRST INSEMINATION/PREGNANT | 59.30 | 8.42E-12 | 0.97 | 0.40 |
| 54 | 4151 | FIRST INSEMINATION/PREGNANT | 58.19 | 8.88E-12 | 0.97 | 0.39 |

|    |      |                             |       |          |      |      |
|----|------|-----------------------------|-------|----------|------|------|
| 55 | 4151 | FIRST INSEMINATION/PREGNANT | 59.22 | 8.73E-12 | 0.97 | 0.42 |
| 56 | 4151 | FIRST INSEMINATION/PREGNANT |       |          |      |      |
| 57 | 4151 | FIRST INSEMINATION/PREGNANT | 60.46 | 8.72E-12 | 0.97 | 0.41 |
| 58 | 4151 | FIRST INSEMINATION/PREGNANT | 59.35 | 8.74E-12 | 0.97 | 0.42 |
| 59 | 4151 | FIRST INSEMINATION/PREGNANT | 58.57 | 8.47E-12 | 0.97 | 0.41 |
| 60 | 4151 | FIRST INSEMINATION/PREGNANT | 57.82 | 8.71E-12 | 0.98 | 0.40 |
| 61 | 4151 | FIRST INSEMINATION/PREGNANT | 59.05 | 8.56E-12 | 0.98 | 0.42 |
| 62 | 4151 | FIRST INSEMINATION/PREGNANT | 58.83 | 8.79E-12 | 0.97 | 0.39 |
| 63 | 4151 | FIRST INSEMINATION/PREGNANT |       |          |      |      |
| 64 | 4151 | FIRST INSEMINATION/PREGNANT | 60.57 | 8.8E-12  | 0.98 | 0.42 |
| 65 | 4151 | FIRST INSEMINATION/PREGNANT | 60.42 | 8.66E-12 | 0.97 | 0.44 |

**n = 3**

| <b>Day</b> | <b>cow<br/>number</b> | <b>state</b> | <b><math>\Delta\epsilon</math></b> | <b><math>\tau</math> (s)</b> | <b><math>\alpha</math></b> | <b><math>\sigma</math> (S/m)</b> |
|------------|-----------------------|--------------|------------------------------------|------------------------------|----------------------------|----------------------------------|
| 1          | 3936                  | NON-PREGNANT | 57.46                              | 8.54E-12                     | 0.97                       | 0.58                             |
| 2          | 3936                  | NON-PREGNANT | 54.80                              | 7.44E-12                     | 0.97                       | 0.56                             |
| 3          | 3936                  | NON-PREGNANT | 61.52                              | 8.59E-12                     | 0.96                       | 0.51                             |
| 4          | 3936                  | NON-PREGNANT | 60.89                              | 9.23E-12                     | 0.98                       | 0.47                             |
| 5          | 3936                  | NON-PREGNANT | 61.20                              | 8.32E-12                     | 0.98                       | 0.48                             |
| 6          | 3936                  | NON-PREGNANT | 59.54                              | 8.60E-12                     | 0.96                       | 0.46                             |
| 7          | 3936                  | NON-PREGNANT |                                    |                              |                            |                                  |
| 8          | 3936                  | NON-PREGNANT | 60.22                              | 8.37E-12                     | 0.97                       | 0.47                             |
| 9          | 3936                  | NON-PREGNANT | 60.29                              | 8.01E-12                     | 0.98                       | 0.47                             |
| 10         | 3936                  | NON-PREGNANT | 58.30                              | 6.87E-12                     | 1.00                       | 0.39                             |

|    |      |                    |       |          |      |      |
|----|------|--------------------|-------|----------|------|------|
| 11 | 3936 | NON-PREGNANT       | 59.52 | 8.26E-12 | 0.97 | 0.45 |
| 12 | 3936 | NON-PREGNANT       | 59.77 | 7.88E-12 | 0.98 | 0.47 |
| 13 | 3936 | FIRST INSEMINATION | 59.93 | 8.21E-12 | 0.97 | 0.48 |
| 14 | 3936 | FIRST INSEMINATION |       |          |      |      |
| 15 | 3936 | FIRST INSEMINATION |       |          |      |      |
| 16 | 3936 | FIRST INSEMINATION | 61.65 | 9.49E-12 | 0.97 | 0.47 |
| 17 | 3936 | FIRST INSEMINATION | 56.41 | 7.11E-12 | 1.00 | 0.35 |
| 18 | 3936 | FIRST INSEMINATION | 59.14 | 7.98E-12 | 0.99 | 0.42 |
| 19 | 3936 | FIRST INSEMINATION | 59.02 | 7.51E-12 | 0.99 | 0.46 |
| 20 | 3936 | FIRST INSEMINATION | 62.26 | 8.46E-12 | 0.96 | 0.46 |
| 21 | 3936 | FIRST INSEMINATION |       |          |      |      |
| 22 | 3936 | FIRST INSEMINATION |       |          |      |      |
| 23 | 3936 | FIRST INSEMINATION | 60.17 | 8.65E-12 | 0.98 | 0.47 |
| 24 | 3936 | FIRST INSEMINATION | 57.48 | 8.87E-12 | 0.98 | 0.46 |
| 25 | 3936 | FIRST INSEMINATION | 60.76 | 8.95E-12 | 0.98 | 0.49 |
| 26 | 3936 | FIRST INSEMINATION | 59.82 | 9.18E-12 | 0.98 | 0.47 |
| 27 | 3936 | FIRST INSEMINATION | 55.62 | 8.77E-12 | 0.98 | 0.45 |
| 28 | 3936 | FIRST INSEMINATION |       |          |      |      |
| 29 | 3936 | FIRST INSEMINATION | 60.77 | 7.56E-12 | 0.98 | 0.44 |
| 30 | 3936 | FIRST INSEMINATION | 60.96 | 7.91E-12 | 0.97 | 0.42 |
| 31 | 3936 | FIRST INSEMINATION | 58.23 | 7.99E-12 | 0.98 | 0.46 |
| 32 | 3936 | FIRST INSEMINATION | 57.73 | 8.10E-12 | 0.98 | 0.44 |
| 33 | 3936 | FIRST INSEMINATION | 59.89 | 7.77E-12 | 0.98 | 0.48 |
| 34 | 3936 | FIRST INSEMINATION | 58.67 | 7.64E-12 | 0.99 | 0.46 |
| 35 | 3936 | FIRST INSEMINATION |       |          |      |      |
| 36 | 3936 | FIRST INSEMINATION | 62.11 | 8.83E-12 | 0.97 | 0.51 |

|    |      |                     |       |          |      |      |
|----|------|---------------------|-------|----------|------|------|
| 37 | 3936 | FIRST INSEMINATION  | 59.80 | 8.88E-12 | 0.97 | 0.52 |
| 38 | 3936 | SECOND INSEMINATION | 59.43 | 8.83E-12 | 0.97 | 0.48 |
| 39 | 3936 | SECOND INSEMINATION | 60.10 | 9.07E-12 | 0.97 | 0.47 |
| 40 | 3936 | SECOND INSEMINATION | 60.66 | 9.26E-12 | 0.96 | 0.48 |
| 41 | 3936 | THIRD INSEMINATION  | 58.40 | 9.02E-12 | 0.97 | 0.47 |
| 42 | 3936 | THIRD INSEMINATION  |       |          |      |      |
| 43 | 3936 | THIRD INSEMINATION  | 61.18 | 9.23E-12 | 0.97 | 0.5  |
| 44 | 3936 | THIRD INSEMINATION  |       |          |      |      |
| 45 | 3936 | THIRD INSEMINATION  | 62.06 | 9.21E-12 | 0.97 | 0.51 |
| 46 | 3936 | THIRD INSEMINATION  | 56.82 | 8.97E-12 | 0.97 | 0.45 |
| 47 | 3936 | THIRD INSEMINATION  | 60.17 | 9.28E-12 | 0.97 | 0.49 |
| 48 | 3936 | THIRD INSEMINATION  | 59.82 | 8.50E-12 | 0.97 | 0.45 |
| 49 | 3936 | THIRD INSEMINATION  |       |          |      |      |
| 50 | 3936 | THIRD INSEMINATION  |       |          |      |      |
| 51 | 3936 | THIRD INSEMINATION  | 61.46 | 8.49E-12 | 0.97 | 0.47 |
| 52 | 3936 | THIRD INSEMINATION  | 60.54 | 8.65E-12 | 0.98 | 0.49 |
| 53 | 3936 | THIRD INSEMINATION  | 60.46 | 8.43E-12 | 0.97 | 0.48 |
| 54 | 3936 | THIRD INSEMINATION  | 60.08 | 8.68E-12 | 0.97 | 0.47 |
| 55 | 3936 | THIRD INSEMINATION  | 59.67 | 8.64E-12 | 0.97 | 0.47 |
| 56 | 3936 | THIRD INSEMINATION  |       |          |      |      |
| 57 | 3936 | THIRD INSEMINATION  | 58.81 | 8.70E-12 | 0.98 | 0.46 |
| 58 | 3936 | THIRD INSEMINATION  | 59.66 | 8.65E-12 | 0.97 | 0.49 |
| 59 | 3936 | THIRD INSEMINATION  | 61.56 | 8.63E-12 | 0.95 | 0.52 |
| 60 | 3936 | THIRD INSEMINATION  | 60.89 | 8.38E-12 | 0.97 | 0.5  |
| 61 | 3936 | THIRD INSEMINATION  | 60.40 | 8.37E-12 | 0.97 | 0.47 |
| 62 | 3936 | THIRD INSEMINATION  | 63.44 | 8.59E-12 | 0.97 | 0.49 |

|    |      |                    |       |          |      |      |
|----|------|--------------------|-------|----------|------|------|
| 63 | 3936 | THIRD INSEMINATION |       |          |      |      |
| 64 | 3936 | THIRD INSEMINATION | 59.84 | 8.78E-12 | 0.97 | 0.49 |
| 65 | 3936 | THIRD INSEMINATION | 59.48 | 8.77E-12 | 0.98 | 0.48 |

**n = 4**

| Day | cow number | state              | $\Delta\epsilon$ | $\tau$ (s) | $\alpha$ | $\sigma$ (S/m) |
|-----|------------|--------------------|------------------|------------|----------|----------------|
| 1   | 4176       | NON-PREGNANT       | 61.16            | 8.38E-12   | 0.94     | 0.45           |
| 2   | 4176       | NON-PREGNANT       | 58.56            | 8.11E-12   | 0.98     | 0.44           |
| 3   | 4176       | NON-PREGNANT       | 65.12            | 8.30E-12   | 0.96     | 0.43           |
| 4   | 4176       | FIRST INSEMINATION | 59.84            | 9.18E-12   | 0.95     | 0.41           |
| 5   | 4176       | FIRST INSEMINATION | 56.46            | 8.33E-12   | 0.98     | 0.38           |
| 6   | 4176       | FIRST INSEMINATION | 58.41            | 8.87E-12   | 0.96     | 0.40           |
| 7   | 4176       | FIRST INSEMINATION |                  |            |          |                |
| 8   | 4176       | FIRST INSEMINATION | 59.02            | 8.30E-12   | 0.97     | 0.40           |
| 9   | 4176       | FIRST INSEMINATION | 59.73            | 8.32E-12   | 0.97     | 0.34           |
| 10  | 4176       | FIRST INSEMINATION | 54.90            | 6.88E-12   | 0.99     | 0.31           |
| 11  | 4176       | FIRST INSEMINATION | 58.91            | 8.00E-12   | 0.97     | 0.39           |
| 12  | 4176       | FIRST INSEMINATION | 58.31            | 7.87E-12   | 0.98     | 0.42           |
| 13  | 4176       | FIRST INSEMINATION | 63.65            | 8.46E-12   | 0.97     | 0.44           |
| 14  | 4176       | FIRST INSEMINATION |                  |            |          |                |
| 15  | 4176       | FIRST INSEMINATION | 58.64            | 8.30E-12   | 0.97     | 0.39           |
| 16  | 4176       | FIRST INSEMINATION | 59.50            | 8.86E-12   | 0.97     | 0.42           |
| 17  | 4176       | FIRST INSEMINATION | 56.09            | 7.16E-12   | 1.00     | 0.30           |
| 18  | 4176       | FIRST INSEMINATION | 57.36            | 7.76E-12   | 0.98     | 0.36           |
| 19  | 4176       | FIRST INSEMINATION | 58.71            | 7.78E-12   | 0.98     | 0.39           |

|    |      |                     |       |          |      |      |
|----|------|---------------------|-------|----------|------|------|
| 20 | 4176 | FIRST INSEMINATION  | 55.01 | 8.56E-12 | 0.97 | 0.38 |
| 21 | 4176 | FIRST INSEMINATION  |       |          |      |      |
| 22 | 4176 | FIRST INSEMINATION  |       |          |      |      |
| 23 | 4176 | FIRST INSEMINATION  | 58.44 | 8.87E-12 | 0.98 | 0.40 |
| 24 | 4176 | FIRST INSEMINATION  | 57.85 | 8.95E-12 | 0.97 | 0.40 |
| 25 | 4176 | SECOND INSEMINATION |       |          |      |      |
| 26 | 4176 | SECOND INSEMINATION | 57.58 | 9.03E-12 | 0.98 | 0.40 |
| 27 | 4176 | SECOND INSEMINATION | 51.67 | 8.84E-12 | 0.98 | 0.34 |
| 28 | 4176 | SECOND INSEMINATION |       |          |      |      |
| 29 | 4176 | SECOND INSEMINATION | 59.16 | 7.49E-12 | 0.98 | 0.36 |
| 30 | 4176 | SECOND INSEMINATION | 58.79 | 8.23E-12 | 0.96 | 0.35 |
| 31 | 4176 | SECOND INSEMINATION | 57.16 | 8.15E-12 | 0.98 | 0.38 |
| 32 | 4176 | SECOND INSEMINATION | 55.60 | 8.22E-12 | 0.98 | 0.36 |
| 33 | 4176 | SECOND INSEMINATION | 59.06 | 7.86E-12 | 0.98 | 0.40 |
| 34 | 4176 | SECOND INSEMINATION | 59.10 | 7.76E-12 | 0.98 | 0.40 |
| 35 | 4176 | SECOND INSEMINATION |       |          |      |      |
| 36 | 4176 | SECOND INSEMINATION | 61.09 | 8.94E-12 | 0.97 | 0.35 |
| 37 | 4176 | SECOND INSEMINATION | 59.68 | 8.99E-12 | 0.96 | 0.41 |
| 38 | 4176 | SECOND INSEMINATION | 56.68 | 9.32E-12 | 0.97 | 0.40 |
| 39 | 4176 | SECOND INSEMINATION | 59.35 | 9.35E-12 | 0.97 | 0.42 |
| 40 | 4176 | SECOND INSEMINATION | 60.06 | 9.10E-12 | 0.97 | 0.44 |
| 41 | 4176 | THIRD INSEMINATION  | 59.47 | 9.21E-12 | 0.97 | 0.43 |
| 42 | 4176 | THIRD INSEMINATION  |       |          |      |      |
| 43 | 4176 | THIRD INSEMINATION  | 59.15 | 9.36E-12 | 0.96 | 0.44 |
| 44 | 4176 | THIRD INSEMINATION  |       |          |      |      |
| 45 | 4176 | THIRD INSEMINATION  | 59.60 | 8.99E-12 | 0.97 | 0.43 |

|    |      |                     |       |          |      |      |
|----|------|---------------------|-------|----------|------|------|
| 46 | 4176 | THIRD INSEMINATION  | 59.53 | 9.10E-12 | 0.97 | 0.44 |
| 47 | 4176 | THIRD INSEMINATION  | 56.64 | 9.40E-12 | 0.97 | 0.38 |
| 48 | 4176 | FOURTH INSEMINATION | 58.73 | 8.27E-12 | 0.97 | 0.37 |
| 49 | 4176 | FOURTH INSEMINATION |       |          |      |      |
| 50 | 4176 | FOURTH INSEMINATION |       |          |      |      |
| 51 | 4176 | FOURTH INSEMINATION | 57.49 | 8.55E-12 | 0.97 | 0.41 |
| 52 | 4176 | FOURTH INSEMINATION | 56.94 | 9.16E-12 | 0.98 | 0.40 |
| 53 | 4176 | FOURTH INSEMINATION | 57.94 | 8.73E-12 | 0.98 | 0.40 |
| 54 | 4176 | FOURTH INSEMINATION | 54.68 | 8.65E-12 | 0.98 | 0.39 |
| 55 | 4176 | FOURTH INSEMINATION | 59.69 | 8.87E-12 | 0.97 | 0.41 |
| 56 | 4176 | FOURTH INSEMINATION |       |          |      |      |
| 57 | 4176 | FOURTH INSEMINATION | 60.84 | 8.73E-12 | 0.97 | 0.42 |
| 58 | 4176 | FOURTH INSEMINATION | 59.20 | 8.82E-12 | 0.97 | 0.41 |
| 59 | 4176 | FOURTH INSEMINATION | 58.25 | 8.81E-12 | 0.97 | 0.40 |
| 60 | 4176 | FOURTH INSEMINATION | 59.59 | 8.33E-12 | 0.97 | 0.43 |
| 61 | 4176 | FOURTH INSEMINATION | 56.37 | 8.57E-12 | 0.98 | 0.40 |
| 62 | 4176 | FOURTH INSEMINATION |       |          |      |      |
| 63 | 4176 | FOURTH INSEMINATION |       |          |      |      |
| 64 | 4176 | FOURTH INSEMINATION | 58.74 | 8.92E-12 | 0.97 | 0.41 |
| 65 | 4176 | FOURTH INSEMINATION | 58.51 | 8.58E-12 | 0.97 | 0.42 |

**n = 5**

| Day | cow number | state        | $\Delta\epsilon$ | $\tau$ (s) | $\alpha$ | $\sigma$ (S/m) |
|-----|------------|--------------|------------------|------------|----------|----------------|
| 1   | 4049       | NON-PREGNANT | 61.08            | 8.08E-12   | 0.95     | 0.48           |



|    |      |                    |       |          |      |      |
|----|------|--------------------|-------|----------|------|------|
| 2  | 4049 | NON-PREGNANT       | 59.95 | 8.39E-12 | 0.98 | 0.49 |
| 3  | 4049 | NON-PREGNANT       | 61.87 | 8.25E-12 | 0.96 | 0.47 |
| 4  | 4049 | NON-PREGNANT       | 60.12 | 8.75E-12 | 0.98 | 0.43 |
| 5  | 4049 | NON-PREGNANT       | 58.72 | 8.14E-12 | 0.98 | 0.44 |
| 6  | 4049 | NON-PREGNANT       | 60.23 | 8.55E-12 | 0.97 | 0.47 |
| 7  | 4049 | NON-PREGNANT       |       |          |      |      |
| 8  | 4049 | NON-PREGNANT       | 61.94 | 8.08E-12 | 0.97 | 0.45 |
| 9  | 4049 | NON-PREGNANT       | 60.37 | 8.22E-12 | 0.98 | 0.45 |
| 10 | 4049 | NON-PREGNANT       | 57.53 | 6.83E-12 | 0.99 | 0.35 |
| 11 | 4049 | NON-PREGNANT       | 59.39 | 7.92E-12 | 0.98 | 0.43 |
| 12 | 4049 | NON-PREGNANT       | 58.34 | 7.90E-12 | 0.98 | 0.44 |
| 13 | 4049 | FIRST INSEMINATION | 58.93 | 8.40E-12 | 0.97 | 0.44 |
| 14 | 4049 | FIRST INSEMINATION |       |          |      |      |
| 15 | 4049 | FIRST INSEMINATION | 58.48 | 8.25E-12 | 0.98 | 0.40 |
| 16 | 4049 | FIRST INSEMINATION | 59.48 | 8.52E-12 | 0.97 | 0.45 |
| 17 | 4049 | FIRST INSEMINATION | 59.51 | 7.27E-12 | 0.99 | 0.39 |
| 18 | 4049 | FIRST INSEMINATION | 58.76 | 7.25E-12 | 1.00 | 0.39 |
| 19 | 4049 | FIRST INSEMINATION | 58.78 | 7.63E-12 | 0.98 | 0.42 |
| 20 | 4049 | FIRST INSEMINATION | 59.77 | 8.51E-12 | 0.98 | 0.46 |
| 21 | 4049 | FIRST INSEMINATION |       |          |      |      |
| 22 | 4049 | FIRST INSEMINATION |       |          |      |      |
| 23 | 4049 | FIRST INSEMINATION | 60.00 | 8.78E-12 | 0.97 | 0.47 |
| 24 | 4049 | FIRST INSEMINATION | 59.06 | 8.89E-12 | 0.98 | 0.45 |
| 25 | 4049 | FIRST INSEMINATION | 58.91 | 8.83E-12 | 0.98 | 0.44 |
| 26 | 4049 | FIRST INSEMINATION | 60.30 | 9.20E-12 | 0.98 | 0.44 |

|    |      |                     |       |          |      |      |
|----|------|---------------------|-------|----------|------|------|
| 27 | 4049 | FIRST INSEMINATION  | 61.07 | 8.84E-12 | 0.98 | 0.46 |
| 28 | 4049 | FIRST INSEMINATION  |       |          |      |      |
| 29 | 4049 | FIRST INSEMINATION  | 58.11 | 7.53E-12 | 0.98 | 0.38 |
| 30 | 4049 | FIRST INSEMINATION  | 58.29 | 7.85E-12 | 0.97 | 0.37 |
| 31 | 4049 | FIRST INSEMINATION  | 58.06 | 8.22E-12 | 0.98 | 0.41 |
| 32 | 4049 | FIRST INSEMINATION  | 57.37 | 8.06E-12 | 0.98 | 0.40 |
| 33 | 4049 | FIRST INSEMINATION  | 57.96 | 7.70E-12 | 0.99 | 0.43 |
| 34 | 4049 | FIRST INSEMINATION  | 57.76 | 7.59E-12 | 0.98 | 0.43 |
| 35 | 4049 | FIRST INSEMINATION  |       |          |      |      |
| 36 | 4049 | FIRST INSEMINATION  | 61.84 | 9.43E-12 | 0.97 | 0.46 |
| 37 | 4049 | FIRST INSEMINATION  | 58.05 | 9.10E-12 | 0.97 | 0.42 |
| 38 | 4049 | SECOND INSEMINATION | 60.91 | 9.07E-12 | 0.97 | 0.47 |
| 39 | 4049 | SECOND INSEMINATION | 58.15 | 9.06E-12 | 0.97 | 0.44 |
| 40 | 4049 | SECOND INSEMINATION | 59.37 | 8.86E-12 | 0.97 | 0.47 |
| 41 | 4049 | SECOND INSEMINATION | 57.95 | 9.12E-12 | 0.97 | 0.44 |
| 42 | 4049 | SECOND INSEMINATION |       |          |      |      |
| 43 | 4049 | SECOND INSEMINATION | 60.60 | 9.25E-12 | 0.97 | 0.47 |
| 44 | 4049 | SECOND INSEMINATION |       |          |      |      |
| 45 | 4049 | SECOND INSEMINATION | 60.92 | 8.99E-12 | 0.97 | 0.46 |
| 46 | 4049 | SECOND INSEMINATION | 61.20 | 8.86E-12 | 0.69 | 0.50 |
| 47 | 4049 | SECOND INSEMINATION | 60.37 | 8.92E-12 | 0.97 | 0.46 |
| 48 | 4049 | SECOND INSEMINATION | 60.36 | 8.24E-12 | 0.97 | 0.44 |
| 49 | 4049 | SECOND INSEMINATION |       |          |      |      |
| 50 | 4049 | SECOND INSEMINATION |       |          |      |      |
| 51 | 4049 | SECOND INSEMINATION | 57.97 | 8.19E-12 | 0.98 | 0.65 |

|    |      |                     |       |          |      |      |
|----|------|---------------------|-------|----------|------|------|
| 52 | 4049 | SECOND INSEMINATION | 57.83 | 8.82E-12 | 0.98 | 0.40 |
| 53 | 4049 | SECOND INSEMINATION | 59.06 | 8.41E-12 | 0.98 | 0.46 |
| 54 | 4049 | SECOND INSEMINATION | 59.50 | 8.66E-12 | 0.98 | 0.44 |
| 55 | 4049 | SECOND INSEMINATION | 57.89 | 8.60E-12 | 0.97 | 0.42 |
| 56 | 4049 | SECOND INSEMINATION |       |          |      |      |
| 57 | 4049 | SECOND INSEMINATION | 60.53 | 8.71E-12 | 0.97 | 0.44 |
| 58 | 4049 | SECOND INSEMINATION | 56.82 | 8.82E-12 | 0.97 | 0.41 |
| 59 | 4049 | SECOND INSEMINATION | 57.43 | 8.63E-12 | 0.97 | 0.42 |
| 60 | 4049 | SECOND INSEMINATION | 58.72 | 8.35E-12 | 0.98 | 0.47 |
| 61 | 4049 | SECOND INSEMINATION | 55.48 | 8.47E-12 | 0.97 | 0.45 |
| 62 | 4049 | SECOND INSEMINATION | 59.87 | 8.89E-12 | 0.98 | 0.46 |
| 63 | 4049 | SECOND INSEMINATION |       |          |      |      |
| 64 | 4049 | SECOND INSEMINATION | 60.00 | 8.76E-12 | 0.97 | 0.43 |
| 65 | 4049 | SECOND INSEMINATION | 60.89 | 8.75E-12 | 0.97 | 0.46 |

**n = 6 / Measured during 34 days, extracted from group due to illness and death**

| Day | cow number | state        | $\Delta\epsilon$ | $\tau$ (s) | $\alpha$ | $\sigma$ (S/m) |
|-----|------------|--------------|------------------|------------|----------|----------------|
| 1   | 3916       | NON-PREGNANT | 63.62            | 8.08E-12   | 0.95     | 0.51           |
| 2   | 3916       | NON-PREGNANT | 54.26            | 8.39E-12   | 0.98     | 0.55           |
| 3   | 3916       | NON-PREGNANT | 61.44            | 8.25E-12   | 0.96     | 0.60           |
| 4   | 3916       | NON-PREGNANT | 59.50            | 8.75E-12   | 0.98     | 0.55           |
| 5   | 3916       | NON-PREGNANT | 58.65            | 8.14E-12   | 0.98     | 0.55           |

|    |      |                    |       |          |      |      |
|----|------|--------------------|-------|----------|------|------|
| 6  | 3916 | NON-PREGNANT       | 60.16 | 8.55E-12 | 0.96 | 0.57 |
| 7  | 3916 | NON-PREGNANT       |       |          |      |      |
| 8  | 3916 | NON-PREGNANT       | 58.64 | 8.08E-12 | 0.98 | 0.55 |
| 9  | 3916 | NON-PREGNANT       | 58.90 | 8.22E-12 | 0.98 | 0.55 |
| 10 | 3916 | NON-PREGNANT       | 57.50 | 6.83E-12 | 0.99 | 0.45 |
| 11 | 3916 | NON-PREGNANT       | 56.59 | 7.92E-12 | 0.98 | 0.52 |
| 12 | 3916 | NON-PREGNANT       |       | 7.90E-12 |      |      |
| 13 | 3916 | FIRST INSEMINATION | 59.03 | 8.40E-12 | 0.97 | 0.56 |
| 14 | 3916 | FIRST INSEMINATION |       |          |      |      |
| 15 | 3916 | FIRST INSEMINATION | 55.99 | 8.25E-12 | 0.98 | 0.51 |
| 16 | 3916 | FIRST INSEMINATION | 55.06 | 8.52E-12 | 0.97 | 0.51 |
| 17 | 3916 | FIRST INSEMINATION | 52.15 | 7.27E-12 | 0.99 | 0.40 |
| 18 | 3916 | FIRST INSEMINATION | 56.42 | 7.25E-12 | 1.00 | 0.45 |
| 19 | 3916 | FIRST INSEMINATION | 58.42 | 7.63E-12 | 0.99 | 0.52 |
| 20 | 3916 | FIRST INSEMINATION | 55.41 | 8.51E-12 | 0.98 | 0.50 |
| 21 | 3916 | FIRST INSEMINATION |       |          |      |      |
| 22 | 3916 | FIRST INSEMINATION |       |          |      |      |
| 23 | 3916 | FIRST INSEMINATION | 56.76 | 8.78E-12 | 0.99 | 0.52 |
| 24 | 3916 | FIRST INSEMINATION | 57.78 | 8.89E-12 | 0.99 | 0.52 |
| 25 | 3916 | FIRST INSEMINATION | 63.75 | 8.83E-12 | 0.98 | 0.58 |
| 26 | 3916 | FIRST INSEMINATION | 54.82 | 9.20E-12 | 0.99 | 0.49 |
| 27 | 3916 | FIRST INSEMINATION | 54.29 | 8.84E-12 | 0.99 | 0.48 |
| 28 | 3916 | FIRST INSEMINATION |       |          |      |      |
| 29 | 3916 | FIRST INSEMINATION | 45.36 | 7.53E-12 | 0.96 | 0.30 |
| 30 | 3916 | FIRST INSEMINATION | 58.20 | 7.85E-12 | 0.96 | 0.46 |

|    |      |                    |       |          |      |      |
|----|------|--------------------|-------|----------|------|------|
| 31 | 3916 | FIRST INSEMINATION | 56.42 | 8.22E-12 | 0.98 | 0.53 |
| 32 | 3916 | FIRST INSEMINATION | 48.03 | 8.06E-12 | 0.99 | 0.41 |
| 33 | 3916 | FIRST INSEMINATION | 55.68 | 7.70E-12 | 0.99 | 0.56 |
| 34 | 3916 | FIRST INSEMINATION | 58.81 | 7.59E-12 | 0.99 | 0.47 |

**n = 7**

| Day | cow number | state              | $\Delta\epsilon$ | $\tau$ (s) | $\alpha$ | $\sigma$ (S/m) |
|-----|------------|--------------------|------------------|------------|----------|----------------|
| 1   | 4143       | NON-PREGNANT       | 59.91            | 8.30E-12   | 0.95     | 0.46           |
| 2   | 4143       | NON-PREGNANT       | 59.25            | 8.14E-12   | 0.98     | 0.48           |
| 3   | 4143       | NON-PREGNANT       | 63.54            | 8.25E-12   | 0.96     | 0.48           |
| 4   | 4143       | NON-PREGNANT       | 58.17            | 8.81E-12   | 0.98     | 0.43           |
| 5   | 4143       | NON-PREGNANT       | 56.71            | 8.19E-12   | 0.98     | 0.41           |
| 6   | 4143       | NON-PREGNANT       | 62.26            | 8.64E-12   | 0.96     | 0.45           |
| 7   | 4143       | NON-PREGNANT       |                  |            |          |                |
| 8   | 4143       | NON-PREGNANT       | 58.35            | 8.11E-12   | 0.97     | 0.42           |
| 9   | 4143       | NON-PREGNANT       | 57.05            | 8.31E-12   | 0.98     | 0.41           |
| 10  | 4143       | NON-PREGNANT       | 55.77            | 6.96E-12   | 0.99     | 0.31           |
| 11  | 4143       | NON-PREGNANT       | 56.54            | 7.91E-12   | 0.98     | 0.41           |
| 12  | 4143       | NON-PREGNANT       | 57.86            | 8.05E-12   | 0.98     | 0.43           |
| 13  | 4143       | FIRST INSEMINATION | 58.31            | 8.41E-12   | 0.97     | 0.44           |
| 14  | 4143       | FIRST INSEMINATION |                  |            |          |                |
| 15  | 4143       | FIRST INSEMINATION | 56.47            | 8.10E-12   | 0.98     | 0.38           |
| 16  | 4143       | FIRST INSEMINATION | 58.33            | 8.73E-12   | 0.97     | 0.42           |

|    |      |                     |       |          |      |      |
|----|------|---------------------|-------|----------|------|------|
| 17 | 4143 | FIRST INSEMINATION  | 55.91 | 7.38E-12 | 0.99 | 0.30 |
| 18 | 4143 | FIRST INSEMINATION  | 57.81 | 7.51E-12 | 0.99 | 0.38 |
| 19 | 4143 | FIRST INSEMINATION  | 57.32 | 7.89E-12 | 0.98 | 0.41 |
| 20 | 4143 | FIRST INSEMINATION  | 59.04 | 8.60E-12 | 0.97 | 0.42 |
| 21 | 4143 | FIRST INSEMINATION  |       |          |      |      |
| 22 | 4143 | FIRST INSEMINATION  |       |          |      |      |
| 23 | 4143 | FIRST INSEMINATION  | 59.64 | 8.76E-12 | 0.98 | 0.46 |
| 24 | 4143 | FIRST INSEMINATION  | 58.65 | 8.84E-12 | 0.98 | 0.44 |
| 25 | 4143 | FIRST INSEMINATION  | 59.15 | 9.13E-12 | 0.98 | 0.43 |
| 26 | 4143 | FIRST INSEMINATION  | 56.55 | 8.90E-12 | 0.98 | 0.42 |
| 27 | 4143 | FIRST INSEMINATION  | 56.75 | 8.88E-12 | 0.98 | 0.42 |
| 28 | 4143 | FIRST INSEMINATION  |       |          |      |      |
| 29 | 4143 | FIRST INSEMINATION  | 57.48 | 7.65E-12 | 0.97 | 0.37 |
| 30 | 4143 | FIRST INSEMINATION  | 57.59 | 7.65E-12 | 0.97 | 0.37 |
| 31 | 4143 | FIRST INSEMINATION  | 59.13 | 8.19E-12 | 0.97 | 0.38 |
| 32 | 4143 | FIRST INSEMINATION  | 55.07 | 7.92E-12 | 0.98 | 0.39 |
| 33 | 4143 | FIRST INSEMINATION  | 58.89 | 7.83E-12 | 0.99 | 0.41 |
| 34 | 4143 | FIRST INSEMINATION  | 58.64 | 7.59E-12 | 0.99 | 0.41 |
| 35 | 4143 | FIRST INSEMINATION  |       |          |      |      |
| 36 | 4143 | FIRST INSEMINATION  | 59.63 | 9.07E-12 | 0.97 | 0.46 |
| 37 | 4143 | FIRST INSEMINATION  | 58.86 | 9.06E-12 | 0.97 | 0.45 |
| 38 | 4143 | SECOND INSEMINATION | 56.57 | 9.29E-12 | 0.97 | 0.43 |
| 39 | 4143 | SECOND INSEMINATION | 59.09 | 8.95E-12 | 0.97 | 0.46 |
| 40 | 4143 | SECOND INSEMINATION | 59.12 | 9.20E-12 | 0.97 | 0.45 |
| 41 | 4143 | SECOND INSEMINATION | 58.62 | 9.05E-12 | 0.97 | 0.45 |

|    |      |                     |       |          |      |      |
|----|------|---------------------|-------|----------|------|------|
| 42 | 4143 | SECOND INSEMINATION |       |          |      |      |
| 43 | 4143 | SECOND INSEMINATION | 59.11 | 9.38E-12 | 0.97 | 0.45 |
| 44 | 4143 | SECOND INSEMINATION |       |          |      |      |
| 45 | 4143 | SECOND INSEMINATION | 59.58 | 8.94E-12 | 0.97 | 0.48 |
| 46 | 4143 | SECOND INSEMINATION | 59.49 | 9.07E-12 | 0.72 | 0.47 |
| 47 | 4143 | SECOND INSEMINATION | 60.48 | 9.09E-12 | 0.95 | 0.43 |
| 48 | 4143 | SECOND INSEMINATION | 58.45 | 8.46E-12 | 0.97 | 0.42 |
| 49 | 4143 | SECOND INSEMINATION |       |          |      |      |
| 50 | 4143 | SECOND INSEMINATION |       |          |      |      |
| 51 | 4143 | SECOND INSEMINATION | 57.97 | 8.19E-12 | 0.98 | 0.44 |
| 52 | 4143 | SECOND INSEMINATION | 51.10 | 1.37E-14 | 0.98 | 0.39 |
| 53 | 4143 | SECOND INSEMINATION | 58.89 | 8.59E-12 | 0.00 | 0.44 |
| 54 | 4143 | SECOND INSEMINATION | 58.50 | 8.86E-12 | 0.97 | 0.44 |
| 55 | 4143 | SECOND INSEMINATION | 58.28 | 8.83E-12 | 0.97 | 0.45 |
| 56 | 4143 | SECOND INSEMINATION |       |          |      |      |
| 57 | 4143 | SECOND INSEMINATION | 59.60 | 8.84E-12 | 0.97 | 0.45 |
| 58 | 4143 | SECOND INSEMINATION | 58.56 | 8.84E-12 | 0.97 | 0.46 |
| 59 | 4143 | SECOND INSEMINATION | 57.82 | 8.45E-12 | 0.97 | 0.43 |
| 60 | 4143 | SECOND INSEMINATION | 58.89 | 8.71E-12 | 0.97 | 0.44 |
| 61 | 4143 | SECOND INSEMINATION | 58.85 | 8.63E-12 | 0.97 | 0.44 |
| 62 | 4143 | SECOND INSEMINATION | 55.50 | 8.81E-12 | 0.98 | 0.41 |
| 63 | 4143 | SECOND INSEMINATION |       |          |      |      |
| 64 | 4143 | SECOND INSEMINATION | 56.82 | 8.64E-12 | 0.97 | 0.44 |
| 65 | 4143 | SECOND INSEMINATION | 56.82 | 8.64E-12 | 0.97 | 0.44 |

**n = 8**

| <b>Day</b> | <b>cow number</b> | <b>state</b> | <b><math>\Delta\epsilon</math></b> | <b><math>\tau</math> (s)</b> | <b><math>\alpha</math></b> | <b><math>\sigma</math> (S/m)</b> |
|------------|-------------------|--------------|------------------------------------|------------------------------|----------------------------|----------------------------------|
| 1          | 4058              | NON-PREGNANT | 56.62                              | 8.19E-12                     | 0.98                       | 0.40                             |
| 2          | 4058              | NON-PREGNANT | 57.48                              | 7.87E-12                     | 0.97                       | 0.49                             |
| 3          | 4058              | NON-PREGNANT | 58.73                              | 8.46E-12                     | 0.96                       | 0.47                             |
| 4          | 4058              | NON-PREGNANT | 57.43                              | 9.27E-12                     | 0.98                       | 0.41                             |
| 5          | 4058              | NON-PREGNANT | 57.81                              | 8.31E-12                     | 0.98                       | 0.43                             |
| 6          | 4058              | NON-PREGNANT | 59.29                              | 8.64E-12                     | 0.96                       | 0.45                             |
| 7          | 4058              | NON-PREGNANT |                                    |                              |                            |                                  |
| 8          | 4058              | NON-PREGNANT | 57.62                              | 8.30E-12                     | 0.97                       | 0.43                             |
| 9          | 4058              | NON-PREGNANT | 57.95                              | 8.62E-12                     | 0.98                       | 0.43                             |
| 10         | 4058              | NON-PREGNANT | 55.76                              | 7.00E-12                     | 0.99                       | 0.34                             |
| 11         | 4058              | NON-PREGNANT | 58.35                              | 8.07E-12                     | 0.98                       | 0.43                             |
| 12         | 4058              | NON-PREGNANT | 58.72                              | 8.00E-12                     | 0.97                       | 0.45                             |
| 13         | 4058              | NON-PREGNANT | 58.79                              | 8.13E-12                     | 0.97                       | 0.47                             |
| 14         | 4058              | NON-PREGNANT |                                    |                              |                            |                                  |
| 15         | 4058              | NON-PREGNANT | 57.51                              | 8.12E-12                     | 0.96                       | 0.39                             |
| 16         | 4058              | NON-PREGNANT | 59.00                              | 8.59E-12                     | 0.97                       | 0.46                             |
| 17         | 4058              | NON-PREGNANT | 50.67                              | 6.74E-12                     | 1.00                       | 0.28                             |
| 18         | 4058              | NON-PREGNANT | 56.68                              | 7.23E-12                     | 0.99                       | 0.39                             |
| 19         | 4058              | NON-PREGNANT | 57.07                              | 7.55E-12                     | 0.98                       | 0.41                             |
| 20         | 4058              | NON-PREGNANT | 58.48                              | 8.23E-12                     | 0.95                       | 0.41                             |
| 21         | 4058              | NON-PREGNANT |                                    |                              |                            |                                  |
| 22         | 4058              | NON-PREGNANT |                                    |                              |                            |                                  |



|    |      |                    |       |          |      |      |
|----|------|--------------------|-------|----------|------|------|
| 23 | 4058 | NON-PREGNANT       | 57.09 | 8.66E-12 | 0.98 | 0.45 |
| 24 | 4058 | NON-PREGNANT       | 57.55 | 8.79E-12 | 0.98 | 0.45 |
| 25 | 4058 | NON-PREGNANT       | 57.80 | 8.87E-12 | 0.98 | 0.45 |
| 26 | 4058 | NON-PREGNANT       | 57.78 | 8.91E-12 | 0.98 | 0.45 |
| 27 | 4058 | NON-PREGNANT       | 54.88 | 8.79E-12 | 0.98 | 0.43 |
| 28 | 4058 | NON-PREGNANT       |       |          |      |      |
| 29 | 4058 | NON-PREGNANT       | 55.31 | 7.74E-12 | 0.97 | 0.38 |
| 30 | 4058 | FIRST INSEMINATION | 57.50 | 7.94E-12 | 0.96 | 0.39 |
| 31 | 4058 | FIRST INSEMINATION | 56.62 | 8.19E-12 | 0.98 | 0.40 |
| 32 | 4058 | FIRST INSEMINATION | 57.00 | 8.09E-12 | 0.98 | 0.40 |
| 33 | 4058 | FIRST INSEMINATION | 57.61 | 8.01E-12 | 0.98 | 0.42 |
| 34 | 4058 | FIRST INSEMINATION | 57.06 | 7.86E-12 | 0.98 | 0.39 |
| 35 | 4058 | FIRST INSEMINATION |       |          |      |      |
| 36 | 4058 | FIRST INSEMINATION | 59.22 | 8.98E-12 | 0.97 | 0.46 |
| 37 | 4058 | FIRST INSEMINATION | 59.09 | 9.17E-12 | 0.97 | 0.45 |
| 38 | 4058 | FIRST INSEMINATION | 57.14 | 9.09E-12 | 0.97 | 0.45 |
| 39 | 4058 | FIRST INSEMINATION | 56.97 | 9.22E-12 | 0.97 | 0.43 |
| 40 | 4058 | FIRST INSEMINATION | 58.16 | 9.49E-12 | 0.97 | 0.46 |
| 41 | 4058 | FIRST INSEMINATION | 57.38 | 9.29E-12 | 0.97 | 0.45 |
| 42 | 4058 | FIRST INSEMINATION |       |          |      |      |
| 43 | 4058 | FIRST INSEMINATION | 57.94 | 9.17E-12 | 0.97 | 0.45 |
| 44 | 4058 | FIRST INSEMINATION |       |          |      |      |
| 45 | 4058 | FIRST INSEMINATION | 59.01 | 9.10E-12 | 0.97 | 0.46 |
| 46 | 4058 | FIRST INSEMINATION | 59.10 | 9.00E-12 | 0.97 | 0.46 |
| 47 | 4058 | FIRST INSEMINATION | 55.41 | 9.13E-12 | 0.97 | 0.42 |

|    |      |                     |       |          |      |      |
|----|------|---------------------|-------|----------|------|------|
| 48 | 4058 | FIRST INSEMINATION  | 59.12 | 8.46E-12 | 0.96 | 0.42 |
| 49 | 4058 | FIRST INSEMINATION  |       |          |      |      |
| 50 | 4058 | FIRST INSEMINATION  |       |          |      |      |
| 51 | 4058 | FIRST INSEMINATION  | 56.50 | 8.31E-12 | 0.98 | 0.45 |
| 52 | 4058 | SECOND INSEMINATION | 58.57 | 8.79E-12 | 0.97 | 0.44 |
| 53 | 4058 | SECOND INSEMINATION | 57.50 | 8.56E-12 | 0.98 | 0.42 |
| 54 | 4058 | SECOND INSEMINATION | 55.81 | 8.78E-12 | 0.97 | 0.40 |
| 55 | 4058 | SECOND INSEMINATION | 55.06 | 8.89E-12 | 0.97 | 0.38 |
| 56 | 4058 | SECOND INSEMINATION |       |          |      |      |
| 57 | 4058 | SECOND INSEMINATION | 58.07 | 8.71E-12 | 0.97 | 0.44 |
| 58 | 4058 | SECOND INSEMINATION | 59.52 | 8.87E-12 | 0.97 | 0.44 |
| 59 | 4058 | SECOND INSEMINATION | 55.47 | 8.53E-12 | 0.97 | 0.42 |
| 60 | 4058 | SECOND INSEMINATION | 56.79 | 8.53E-12 | 0.97 | 0.42 |
| 61 | 4058 | SECOND INSEMINATION | 57.90 | 8.38E-12 | 0.97 | 0.45 |
| 62 | 4058 | SECOND INSEMINATION | 56.98 | 8.79E-12 | 0.97 | 0.42 |
| 63 | 4058 | SECOND INSEMINATION |       |          |      |      |
| 64 | 4058 | SECOND INSEMINATION | 56.50 | 8.75E-12 | 0.97 | 0.44 |
| 65 | 4058 | SECOND INSEMINATION | 57.48 | 8.75E-12 | 0.97 | 0.44 |

**n = 9**

| <b>Day</b> | <b>cow number</b> | <b>state</b> | <b><math>\Delta\epsilon</math></b> | <b><math>\tau</math> (s)</b> | <b><math>\alpha</math></b> | <b><math>\sigma</math> (S/m)</b> |
|------------|-------------------|--------------|------------------------------------|------------------------------|----------------------------|----------------------------------|
| 1          | 4169              | NON-PREGNANT | 60.13                              | 8.32E-12                     | 0.95                       | 0.51                             |
| 2          | 4169              | NON-PREGNANT | 60.98                              | 7.96E-12                     | 0.98                       | 0.53                             |

|    |      |              |       |          |      |      |
|----|------|--------------|-------|----------|------|------|
| 3  | 4169 | NON-PREGNANT | 61.95 | 8.20E-12 | 0.96 | 0.50 |
| 4  | 4169 | NON-PREGNANT | 58.55 | 8.70E-12 | 0.98 | 0.47 |
| 5  | 4169 | NON-PREGNANT | 59.27 | 8.23E-12 | 0.98 | 0.44 |
| 6  | 4169 | NON-PREGNANT | 62.98 | 8.59E-12 | 0.96 | 0.48 |
| 7  | 4169 | NON-PREGNANT |       |          |      |      |
| 8  | 4169 | NON-PREGNANT | 58.66 | 8.18E-12 | 0.97 | 0.47 |
| 9  | 4169 | NON-PREGNANT | 60.16 | 8.17E-12 | 0.98 | 0.49 |
| 10 | 4169 | NON-PREGNANT | 56.78 | 7.20E-12 | 0.99 | 0.37 |
| 11 | 4169 | NON-PREGNANT |       |          |      |      |
| 12 | 4169 | NON-PREGNANT | 59.97 | 8.02E-12 | 0.98 | 0.47 |
| 13 | 4169 | NON-PREGNANT | 60.29 | 8.35E-12 | 0.97 | 0.49 |
| 14 | 4169 | NON-PREGNANT |       |          |      |      |
| 15 | 4169 | NON-PREGNANT | 58.51 | 8.09E-12 | 0.98 | 0.46 |
| 16 | 4169 | NON-PREGNANT | 61.37 | 8.65E-12 | 0.97 | 0.51 |
| 17 | 4169 | NON-PREGNANT | 54.10 | 7.09E-12 | 1.00 | 0.28 |
| 18 | 4169 | NON-PREGNANT | 59.91 | 7.31E-12 | 1.00 | 0.45 |
| 19 | 4169 | NON-PREGNANT | 58.84 | 7.69E-12 | 0.98 | 0.47 |
| 20 | 4169 | NON-PREGNANT | 58.81 | 8.46E-12 | 0.97 | 0.48 |
| 21 | 4169 | NON-PREGNANT |       |          |      |      |
| 22 | 4169 | NON-PREGNANT |       |          |      |      |
| 23 | 4169 | NON-PREGNANT | 59.32 | 8.70E-12 | 0.98 | 0.50 |
| 24 | 4169 | NON-PREGNANT | 58.54 | 8.95E-12 | 0.98 | 0.50 |
| 25 | 4169 | NON-PREGNANT | 61.33 | 8.85E-12 | 0.97 | 0.50 |
| 26 | 4169 | NON-PREGNANT | 57.41 | 8.84E-12 | 0.99 | 0.49 |
| 27 | 4169 | NON-PREGNANT | 59.29 | 8.78E-12 | 0.98 | 0.49 |

|    |      |                    |       |          |      |      |
|----|------|--------------------|-------|----------|------|------|
| 28 | 4169 | NON-PREGNANT       |       |          |      |      |
| 29 | 4169 | NON-PREGNANT       | 60.19 | 7.77E-12 | 0.97 | 0.44 |
| 30 | 4169 | NON-PREGNANT       | 62.16 | 8.59E-12 | 0.96 | 0.45 |
| 31 | 4169 | NON-PREGNANT       | 60.54 | 8.13E-12 | 0.98 | 0.45 |
| 32 | 4169 | NON-PREGNANT       | 58.37 | 8.05E-12 | 0.98 | 0.46 |
| 33 | 4169 | NON-PREGNANT       | 60.01 | 7.76E-12 | 0.98 | 0.48 |
| 34 | 4169 | NON-PREGNANT       | 60.05 | 7.71E-12 | 0.98 | 0.47 |
| 35 | 4169 | NON-PREGNANT       |       |          |      |      |
| 36 | 4169 | NON-PREGNANT       | 60.44 | 9.21E-12 | 0.97 | 0.51 |
| 37 | 4169 | NON-PREGNANT       | 61.81 | 9.04E-12 | 0.97 | 0.51 |
| 38 | 4169 | NON-PREGNANT       | 59.58 | 9.16E-12 | 0.97 | 0.51 |
| 39 | 4169 | NON-PREGNANT       | 60.51 | 9.69E-12 | 0.97 | 0.48 |
| 40 | 4169 | NON-PREGNANT       | 60.14 | 8.92E-12 | 0.97 | 0.52 |
| 41 | 4169 | FIRST INSEMINATION | 61.80 | 9.09E-12 | 0.97 | 0.51 |
| 42 | 4169 | FIRST INSEMINATION |       |          |      |      |
| 43 | 4169 | FIRST INSEMINATION | 60.92 | 9.45E-12 | 0.97 | 0.49 |
| 44 | 4169 | FIRST INSEMINATION |       |          |      |      |
| 45 | 4169 | FIRST INSEMINATION | 61.38 | 8.94E-12 | 0.97 | 0.51 |
| 46 | 4169 | FIRST INSEMINATION | 58.18 | 8.85E-12 | 0.97 | 0.50 |
| 47 | 4169 | FIRST INSEMINATION | 60.99 | 9.06E-12 | 0.97 | 0.49 |
| 48 | 4169 | FIRST INSEMINATION | 59.57 | 8.29E-12 | 0.97 | 0.47 |
| 49 | 4169 | FIRST INSEMINATION |       |          |      |      |
| 50 | 4169 | FIRST INSEMINATION |       |          |      |      |
| 51 | 4169 | FIRST INSEMINATION | 60.09 | 8.41E-12 | 0.98 | 0.52 |
| 52 | 4169 | FIRST INSEMINATION | 61.50 | 8.67E-12 | 0.97 | 0.49 |

|    |      |                    |       |          |      |      |
|----|------|--------------------|-------|----------|------|------|
| 53 | 4169 | FIRST INSEMINATION | 59.24 | 8.74E-12 | 0.98 | 0.49 |
| 54 | 4169 | FIRST INSEMINATION | 59.05 | 8.68E-12 | 0.98 | 0.48 |
| 55 | 4169 | FIRST INSEMINATION | 60.53 | 8.78E-12 | 0.98 | 0.50 |
| 56 | 4169 | FIRST INSEMINATION |       |          |      |      |
| 57 | 4169 | FIRST INSEMINATION | 60.40 | 8.71E-12 | 0.98 | 0.50 |
| 58 | 4169 | FIRST INSEMINATION | 60.16 | 8.68E-12 | 0.98 | 0.50 |
| 59 | 4169 | FIRST INSEMINATION | 59.49 | 8.67E-12 | 0.97 | 0.49 |
| 60 | 4169 | FIRST INSEMINATION | 60.97 | 8.54E-12 | 0.97 | 0.51 |
| 61 | 4169 | FIRST INSEMINATION | 52.14 | 8.29E-12 | 0.98 | 0.41 |
| 62 | 4169 | FIRST INSEMINATION | 59.69 | 8.93E-12 | 0.98 | 0.50 |
| 63 | 4169 | FIRST INSEMINATION |       |          |      |      |
| 64 | 4169 | FIRST INSEMINATION | 60.93 | 8.69E-12 | 0.97 | 0.49 |
| 65 | 4169 | FIRST INSEMINATION | 60.17 | 8.75E-12 | 0.98 | 0.49 |

**n = 10**

| <b>Day</b> | <b>cow number</b> | <b>state</b> | <b><math>\Delta\epsilon</math></b> | <b><math>\tau</math> (s)</b> | <b><math>\alpha</math></b> | <b><math>\sigma</math> (S/m)</b> |
|------------|-------------------|--------------|------------------------------------|------------------------------|----------------------------|----------------------------------|
| 1          | 4082              | NON PREGNANT | 59.86                              | 8.58E-12                     | 0.97                       | 0.53                             |
| 2          | 4082              | NON PREGNANT | 60.37                              | 8.28E-12                     | 0.98                       | 0.52                             |
| 3          | 4082              | NON PREGNANT | 57.09                              | 8.30E-12                     | 0.96                       | 0.34                             |
| 4          | 4082              | NON PREGNANT | 57.68                              | 8.68E-12                     | 0.98                       | 0.47                             |
| 5          | 4082              | NON PREGNANT | 57.58                              | 8.40E-12                     | 0.98                       | 0.46                             |
| 6          | 4082              | NON PREGNANT | 60.43                              | 8.61E-12                     | 0.96                       | 0.49                             |

|    |      |                    |       |          |      |      |
|----|------|--------------------|-------|----------|------|------|
| 7  | 4082 | NON PREGNANT       |       |          |      |      |
| 8  | 4082 | NON PREGNANT       | 61.39 | 8.08E-12 | 0.97 | 0.48 |
| 9  | 4082 | NON PREGNANT       | 61.10 | 8.23E-12 | 0.97 | 0.48 |
| 10 | 4082 | NON PREGNANT       | 58.56 | 7.43E-12 | 0.98 | 0.37 |
| 11 | 4082 | NON PREGNANT       | 59.95 | 7.92E-12 | 0.98 | 0.49 |
| 12 | 4082 | NON PREGNANT       | 57.49 | 7.92E-12 | 0.98 | 0.48 |
| 13 | 4082 | NON PREGNANT       |       |          |      |      |
| 14 | 4082 | NON PREGNANT       |       |          |      |      |
| 15 | 4082 | NON PREGNANT       | 55.86 | 8.06E-12 | 0.98 | 0.43 |
| 16 | 4082 | NON PREGNANT       | 59.80 | 8.49E-12 | 0.97 | 0.51 |
| 17 | 4082 | FIRST INSEMINATION | 59.44 | 7.27E-12 | 1.00 | 0.39 |
| 18 | 4082 | FIRST INSEMINATION |       |          |      |      |
| 19 | 4082 | FIRST INSEMINATION | 57.04 | 7.45E-12 | 0.98 | 0.46 |
| 20 | 4082 | FIRST INSEMINATION | 59.99 | 8.67E-12 | 0.98 | 0.49 |
| 21 | 4082 | FIRST INSEMINATION |       |          |      |      |
| 22 | 4082 | FIRST INSEMINATION |       |          |      |      |
| 23 | 4082 | FIRST INSEMINATION | 61.15 | 8.70E-12 | 0.98 | 0.51 |
| 24 | 4082 | FIRST INSEMINATION | 58.52 | 8.92E-12 | 0.98 | 0.48 |
| 25 | 4082 | FIRST INSEMINATION | 60.26 | 8.98E-12 | 0.98 | 0.50 |
| 26 | 4082 | FIRST INSEMINATION | 59.62 | 8.78E-12 | 0.98 | 0.51 |
| 27 | 4082 | FIRST INSEMINATION | 59.73 | 9.04E-12 | 0.98 | 0.49 |
| 28 | 4082 | FIRST INSEMINATION |       |          |      |      |
| 29 | 4082 | FIRST INSEMINATION | 58.97 | 7.55E-12 | 0.98 | 0.43 |
| 30 | 4082 | FIRST INSEMINATION | 59.08 | 8.16E-12 | 0.97 | 0.44 |
| 31 | 4082 | FIRST INSEMINATION | 58.84 | 8.08E-12 | 0.98 | 0.46 |

|    |      |                     |       |          |      |      |
|----|------|---------------------|-------|----------|------|------|
| 32 | 4082 | FIRST INSEMINATION  | 57.62 | 7.93E-12 | 0.98 | 0.47 |
| 33 | 4082 | FIRST INSEMINATION  | 59.77 | 7.60E-12 | 0.98 | 0.49 |
| 34 | 4082 | FIRST INSEMINATION  | 59.15 | 7.78E-12 | 0.98 | 0.47 |
| 35 | 4082 | FIRST INSEMINATION  |       |          |      |      |
| 36 | 4082 | FIRST INSEMINATION  | 60.38 | 9.04E-12 | 0.97 | 0.51 |
| 37 | 4082 | FIRST INSEMINATION  | 59.84 | 9.15E-12 | 0.97 | 0.50 |
| 38 | 4082 | FIRST INSEMINATION  | 55.40 | 9.04E-12 | 0.97 | 0.46 |
| 39 | 4082 | SECOND INSEMINATION | 58.25 | 9.98E-12 | 0.97 | 0.43 |
| 40 | 4082 | SECOND INSEMINATION | 59.78 | 9.24E-12 | 0.97 | 0.50 |
| 41 | 4082 | SECOND INSEMINATION | 61.05 | 9.07E-12 | 0.96 | 0.50 |
| 42 | 4082 | SECOND INSEMINATION |       |          |      |      |
| 43 | 4082 | SECOND INSEMINATION | 60.59 | 9.22E-12 | 0.97 | 0.50 |
| 44 | 4082 | SECOND INSEMINATION |       |          |      |      |
| 45 | 4082 | SECOND INSEMINATION | 61.80 | 8.88E-12 | 0.96 | 0.52 |
| 46 | 4082 | SECOND INSEMINATION | 60.94 | 8.79E-12 | 0.97 | 0.54 |
| 47 | 4082 | SECOND INSEMINATION | 59.27 | 9.14E-12 | 0.96 | 0.49 |
| 48 | 4082 | SECOND INSEMINATION | 60.36 | 8.13E-12 | 0.97 | 0.47 |
| 49 | 4082 | SECOND INSEMINATION |       |          |      |      |
| 50 | 4082 | SECOND INSEMINATION |       |          |      |      |
| 51 | 4082 | SECOND INSEMINATION | 60.00 | 8.56E-12 | 0.98 | 0.50 |
| 52 | 4082 | SECOND INSEMINATION | 60.11 | 9.00E-12 | 0.97 | 0.48 |
| 53 | 4082 | SECOND INSEMINATION | 59.85 | 8.70E-12 | 0.98 | 0.49 |
| 54 | 4082 | SECOND INSEMINATION | 57.73 | 8.62E-12 | 0.98 | 0.48 |
| 55 | 4082 | SECOND INSEMINATION | 59.85 | 8.79E-12 | 0.97 | 0.49 |
| 56 | 4082 | SECOND INSEMINATION |       |          |      |      |

|    |      |                     |       |          |      |      |
|----|------|---------------------|-------|----------|------|------|
| 57 | 4082 | SECOND INSEMINATION | 61.38 | 8.79E-12 | 0.97 | 0.49 |
| 58 | 4082 | SECOND INSEMINATION | 60.61 | 8.90E-12 | 0.97 | 0.51 |
| 59 | 4082 | SECOND INSEMINATION | 59.18 | 8.42E-12 | 0.98 | 0.49 |
| 60 | 4082 | SECOND INSEMINATION | 57.18 | 8.52E-12 | 0.97 | 0.48 |
| 61 | 4082 | SECOND INSEMINATION | 63.83 | 8.59E-12 | 0.97 | 0.55 |
| 62 | 4082 | SECOND INSEMINATION | 59.36 | 8.68E-12 | 0.97 | 0.50 |
| 63 | 4082 | SECOND INSEMINATION |       |          |      |      |
| 64 | 4082 | SECOND INSEMINATION | 59.89 | 8.75E-12 | 0.97 | 0.49 |
| 65 | 4082 | SECOND INSEMINATION | 59.18 | 8.64E-12 | 0.97 | 0.49 |



**SUPPORTING INFORMATION 3: Physiological and Microwave Dielectric fitting parameters of milk from randomly selected pregnant and non-pregnant cows.**

**Table S3A:** Physiological parameters (Somatic cell count -SCC, Fat %, protein%, lactose%, and Milk Fat Globule Average diameter) and Microwave Dielectric parameters (Cole-Cole: dielectric strength-  $\Delta\epsilon$ , relaxation time  $\tau$ (s), broadening parameter- $\alpha$ , and conductivity- $\sigma$ (Siemens/m) of milk from randomly selected pregnant cows. Each measurement corresponds to a different date.

| cow number | state    | $\Delta\epsilon$ | $\tau$ (s) | $\alpha$ | ( $\sigma$ -S/m) | MFG diameter | SCC  | Fat  | Protein | Lactose |
|------------|----------|------------------|------------|----------|------------------|--------------|------|------|---------|---------|
| 3782       | pregnant | 59.44            | 8.6E-12    | 0.98     | 0.40             | 3.55         | 40   | 3.36 | 3.04    | 4.59    |
| 3954       | pregnant | 59.20            | 8.49E-12   | 0.99     | 0.40             | 3.66         | 84   | 3.42 | 3.3     | 5.08    |
| 3602       | pregnant | 60.24            | 8.37E-12   | 0.99     | 0.43             | 3.35         | 1419 | 3.82 | 3.55    | 4.57    |
| 3933       | pregnant | 57.09            | 8.91E-12   | 0.99     | 0.44             | 3.69         | 429  | 3.84 | 3.13    | 5.1     |
| 3665       | pregnant | 58.28            | 8.38E-12   | 0.99     | 0.44             | 4.29         | 165  | 3.88 | 3.35    | 4.65    |
| 3950       | pregnant | 61.04            | 8.51E-12   | 0.99     | 0.49             | 2.78         | 392  | 3.39 | 3.18    | 4.81    |
| 3970       | pregnant | 57.12            | 8.93E-12   | 0.98     | 0.37             | 3.68         | 596  | 4.35 | 3.17    | 5.02    |
| 3485       | pregnant | 57.51            | 8.6E-12    | 0.99     | 0.49             | 3.23         | 50   | 3.63 | 3.34    | 5.04    |
| 3950       | pregnant | 60.17            | 8.77E-12   | 0.99     | 0.49             | 3.34         | 420  | 2.94 | 3.25    | 4.59    |
| 3866       | pregnant | 60.46            | 8.6E-12    | 0.98     | 0.44             | 3.55         | 44   | 3.03 | 3.32    | 5.33    |
| 3633       | pregnant | 58.44            | 8.79E-12   | 1.00     | 0.44             | 3.5          | 229  | 4.13 | 3.56    | 4.56    |

|      |          |       |          |      |      |      |      |      |      |      |
|------|----------|-------|----------|------|------|------|------|------|------|------|
| 3802 | pregnant | 58.90 | 8.97E-12 | 0.99 | 0.50 | 3.31 | 70   | 3.73 | 3.04 | 5.4  |
| 3835 | pregnant | 56.09 | 8.5E-12  | 0.99 | 0.43 | 3.33 | 164  | 4.72 | 3.57 | 4.72 |
| 3867 | pregnant | 59.65 | 8.63E-12 | 0.98 | 0.44 | 3.5  | 23   | 2.87 | 3.02 | 4.89 |
| 3599 | pregnant | 58.23 | 8.72E-12 | 0.99 | 0.46 | 3.36 | 32   | 3.62 | 2.99 | 5.27 |
| 3287 | pregnant | 56.97 | 8.33E-12 | 0.99 | 0.46 | 3.49 | 1408 | 3.94 | 3.6  | 4.36 |
| 3835 | pregnant | 55.10 | 8.82E-12 | 0.99 | 0.42 | 3.11 | 187  | 4.55 | 3.73 | 4.66 |
| 3324 | pregnant | 55.50 | 8.43E-12 | 0.99 | 0.52 | 3.23 | 497  | 4.38 | 3.41 | 4.86 |
| 3748 | pregnant | 53.36 | 8.48E-12 | 0.98 | 0.42 | 3.06 | 226  | 3.39 | 3.07 | 5.54 |
| 3599 | pregnant | 50.51 | 8.91E-12 | 0.98 | 0.44 | 3.5  | 189  | 3.58 | 3.31 | 4.98 |
| 3633 | pregnant | 54.40 | 8.85E-12 | 0.99 | 0.44 | 3.32 | 214  | 4.26 | 3.28 | 5.1  |
| 3748 | pregnant | 59.70 | 8.61E-12 | 0.98 | 0.52 | 3.6  | 350  | 3.47 | 3.04 | 5.33 |
| 3830 | pregnant | 59.65 | 8.90E-12 | 0.99 | 0.55 | 3.6  | 3250 | 3.56 | 3.24 | 4.77 |
| 3818 | pregnant | 58.92 | 8.89E-12 | 0.98 | 0.46 | 3.97 | 78   | 3.63 | 3.32 | 4.84 |
| 3768 | pregnant | 59.84 | 8.83E-12 | 0.99 | 0.41 | 3.49 | 89   | 3.77 | 3.17 | 5.17 |
| 3827 | pregnant | 59.36 | 8.15E-12 | 1.00 | 0.40 | 4.25 | 508  | 4.46 | 3.59 | 4.52 |
| 3801 | pregnant | 63.04 | 8.36E-12 | 1.00 | 0.52 | 3.27 | 439  | 2.35 | 3.11 | 4.41 |
| 3324 | pregnant | 61.05 | 8.18E-12 | 1.00 | 0.51 | 3.33 | 900  | 4.69 | 4.13 | 4.1  |

|      |          |       |          |      |      |      |      |      |      |      |
|------|----------|-------|----------|------|------|------|------|------|------|------|
| 3592 | pregnant | 58.21 | 8.16E-12 | 1.00 | 0.42 | 3.68 | 252  | 3.04 | 3.73 | 4.66 |
| 3827 | pregnant | 54.93 | 8.55E-12 | 0.98 | 0.49 | 3.21 | 508  | 3.85 | 3.57 | 3.11 |
| 3664 | pregnant | 59.25 | 8.57E-12 | 0.98 | 0.46 | 4.14 | 2596 | 3.69 | 3.04 | 5.24 |
| 3856 | pregnant | 54.04 | 8.61E-12 | 0.98 | 0.39 | 3.5  | 93   | 3.7  | 3.27 | 5.25 |
| 3768 | pregnant | 58.27 | 8.56E-12 | 0.98 | 0.44 | 3.93 | 89   | 3.13 | 3.11 | 5.17 |
| 3485 | pregnant | 59.09 | 8.95E-12 | 0.98 | 0.49 | 3.21 | 35   | 3.93 | 3.53 | 4.83 |
| 3610 | pregnant | 59.15 | 8.71E-12 | 0.99 | 0.43 | 3.41 | 66   | 4.13 | 2.88 | 5.12 |
| 3768 | pregnant | 58.93 | 8.80E-12 | 0.98 | 0.45 | 3.72 | 89   | 3.29 | 3.09 | 5    |
| 3698 | pregnant | 57.68 | 8.83E-12 | 1.00 | 0.37 | 2.94 | 496  | 3.7  | 3.64 | 4.58 |
| 3610 | pregnant | 57.72 | 8.55E-12 | 0.99 | 0.44 | 3.9  | 66   | 3.37 | 3.27 | 5.2  |
| 3812 | pregnant | 57.44 | 8.28E-12 | 0.99 | 0.55 | 4.19 | 147  | 3.9  | 3.59 | 4.41 |
| 3943 | pregnant | 55.91 | 8.62E-12 | 0.99 | 0.43 | 3.18 | 169  | 4.52 | 3.28 | 5.19 |
| 3943 | pregnant | 57.95 | 8.44E-12 | 0.99 | 0.42 | 3.45 | 169  | 4.54 | 3.53 | 5.06 |
| 3656 | pregnant | 60.66 | 8.65E-12 | 0.99 | 0.50 | 3.27 | 3945 | 3.39 | 3.73 | 3.86 |
| 3656 | pregnant | 55.59 | 8.48E-12 | 0.98 | 0.53 | 3.2  | 3945 | 3.36 | 3.73 | 3.86 |
| 3936 | pregnant | 59.48 | 8.78E-12 | 1.00 | 0.42 | 3.25 | 428  | 3.71 | 3.4  | 4.67 |
| 3698 | pregnant | 55.41 | 8.26E-12 | 1.00 | 0.34 | 3.99 | 1875 | 4.8  | 3.77 | 4.81 |

|      |          |       |          |      |      |       |     |      |      |      |
|------|----------|-------|----------|------|------|-------|-----|------|------|------|
| 3721 | pregnant | 59.94 | 8.30E-12 | 0.99 | 0.57 | 4.06  | 410 | 3.51 | 3.6  | 4.33 |
| 3855 | pregnant | 59.54 | 8.70E-12 | 0.99 | 0.46 | 3.44  | 342 | 3.3  | 3.62 | 4.48 |
| 3427 | pregnant | 58.04 | 8.16E-12 | 1.00 | 0.39 | 4.07  | 472 | 4.22 | 3.59 | 4.89 |
| 3427 | pregnant | 60.33 | 8.59E-12 | 0.98 | 0.50 | 3.9   | 472 | 3.67 | 3.09 | 3.88 |
| 3938 | pregnant | 58.68 | 8.79E-12 | 1.00 | 0.35 | 4.101 | 273 | 3.55 | 3.53 | 4.69 |

**Table S3B:** Physiological parameters (Somatic cell count -SCC, Fat %, protein%, lactose%, and Milk Fat Globule Average diameter) and Microwave Dielectric parameters (Cole-Cole: dielectric strength-  $\Delta\epsilon$ , relaxation time  $\tau$ (s), broadening parameter- $\alpha$ , and conductivity- $\sigma$ (Siemens/m) of milk from randomly selected non- pregnant cows. Each measurement corresponds to a different date.

| cow number | state        | $\Delta\epsilon$ | $\tau$ (s) | $\alpha$ | ( $\sigma$ S/m) | MFG diameter | SCC  | Fat  | Protein | Lactose |
|------------|--------------|------------------|------------|----------|-----------------|--------------|------|------|---------|---------|
| 3680       | Non-pregnant | 58.13            | 8.6E-12    | 0.99     | 0.49            | 3.5          | 90   | 3.93 | 3.11    | 5.1     |
| 3561       | Non-pregnant | 59.26            | 8.53E-12   | 0.99     | 0.47            | 2.79         | 65   | 3.58 | 3.42    | 5.07    |
| 3960       | Non-pregnant | 58.39            | 8.84E-12   | 0.99     | 0.40            | 4.17         | 1021 | 3.17 | 3.45    | 4.71    |
| 3678       | Non-pregnant | 60.01            | 8.79E-12   | 0.99     | 0.49            | 4.64         | 214  | 2.87 | 3.33    | 4.67    |
| 3968       | Non-pregnant | 56.45            | 8.55E-12   | 0.99     | 0.42            | 3.309        | 189  | 3.84 | 3.16    | 5.19    |
| 3926       | Non-pregnant | 60.13            | 8.82E-12   | 1.00     | 0.41            | 3.11         | 60   | 3.73 | 3.47    | 4.71    |

|      |              |       |          |      |      |       |      |      |      |      |
|------|--------------|-------|----------|------|------|-------|------|------|------|------|
| 3401 | Non-pregnant | 59.58 | 8.55E-12 | 0.98 | 0.48 | 3.55  | 5506 | 3.21 | 3.3  | 3.62 |
| 3837 | Non-pregnant | 55.58 | 8.57E-12 | 0.99 | 0.41 | 3.69  | 2910 | 4.41 | 3.27 | 5.19 |
| 3397 | Non-pregnant | 57.76 | 8.83E-12 | 0.99 | 0.49 | 3.34  | 143  | 4.67 | 2.98 | 3.38 |
| 3561 | Non-pregnant | 60.26 | 9.06E-12 | 0.99 | 0.48 | 3.24  | 145  | 3.95 | 3.24 | 5.01 |
| 3926 | Non-pregnant | 56.84 | 8.6E-12  | 0.99 | 0.46 | 2.9   | 60   | 3.79 | 3.04 | 5.1  |
| 3926 | Non-pregnant | 58.41 | 8.57E-12 | 0.99 | 0.44 | 3.09  | 60   | 3.94 | 3.11 | 5.13 |
| 3874 | Non-pregnant | 57.92 | 8.62E-12 | 0.99 | 0.41 | 4.33  | 31   | 3.49 | 3.33 | 5.18 |
| 3926 | Non-pregnant | 59.67 | 8.96E-12 | 0.98 | 0.45 | 3.18  | 35   | 3.95 | 3.02 | 5.12 |
| 3561 | Non-pregnant | 58.64 | 8.63E-12 | 0.98 | 0.54 | 3.4   | 4362 | 3.76 | 3.5  | 4.31 |
| 3940 | Non-pregnant | 56.32 | 8.84E-12 | 1.00 | 0.47 | 3.46  | 596  | 3.27 | 3.5  | 4.84 |
| 3926 | Non-pregnant | 57.05 | 8.82E-12 | 0.99 | 0.43 | 3.294 | 35   | 3.3  | 3.49 | 4.86 |
| 3551 | Non-pregnant | 60.03 | 8.69E-12 | 0.99 | 0.54 | 3.61  | 271  | 3.44 | 3.04 | 4.67 |
| 3837 | Non-pregnant | 55.31 | 8.59E-12 | 0.98 | 0.40 | 4.26  | 89   | 4.18 | 3.39 | 5.39 |
| 3431 | Non-pregnant | 58.23 | 8.56E-12 | 0.98 | 0.47 | 3.47  | 1849 | 4.66 | 3.23 | 4.02 |
| 3585 | Non-pregnant | 58.56 | 8.48E-12 | 0.99 | 0.49 | 3.57  | 246  | 3.92 | 3.3  | 4.74 |
| 3403 | Non-pregnant | 59.96 | 8.28E-12 | 0.99 | 0.50 | 4.12  | 126  | 3.83 | 3.68 | 4.49 |
| 3431 | Non-pregnant | 58.48 | 8.24E-12 | 1.00 | 0.41 | 4.16  | 1849 | 5.73 | 4.24 | 4.5  |

|      |              |       |          |      |      |       |      |      |      |      |
|------|--------------|-------|----------|------|------|-------|------|------|------|------|
| 3886 | Non-pregnant | 59.78 | 8.58E-12 | 0.98 | 0.46 | 4.36  | 175  | 3.8  | 3.36 | 5.03 |
| 3898 | Non-pregnant | 59.28 | 8.61E-12 | 0.99 | 0.46 | 3.35  | 16   | 3.79 | 3.23 | 5.1  |
| 3401 | Non-pregnant | 60.09 | 8.72E-12 | 1.00 | 0.39 | 3.76  | 177  | 3.88 | 3.56 | 4.6  |
| 3798 | Non-pregnant | 55.86 | 8.72E-12 | 0.99 | 0.46 | 3.75  | 3138 | 3.93 | 3.39 | 4.94 |
| 3898 | Non-pregnant | 59.86 | 8.84E-12 | 0.99 | 0.44 | 3.92  | 609  | 3.37 | 3.32 | 4.84 |
| 3882 | Non-pregnant | 59.69 | 8.64E-12 | 0.99 | 0.44 | 3.56  | 21   | 3.7  | 3    | 5.07 |
| 3371 | Non-pregnant | 56.80 | 8.27E-12 | 0.99 | 0.42 | 3.23  | 427  | 3.34 | 3.45 | 4.59 |
| 3997 | Non-pregnant | 56.92 | 8.95E-12 | 0.99 | 0.39 | 4.05  | 195  | 3.65 | 2.91 | 5.25 |
| 3971 | Non-pregnant | 59.81 | 8.83E-12 | 1.00 | 0.42 | 3.144 | 85   | 3.5  | 3.58 | 4.47 |
| 3882 | Non-pregnant | 60.08 | 8.61E-12 | 0.98 | 0.45 | 3.26  | 165  | 3.36 | 3.19 | 5.08 |
| 3808 | Non-pregnant | 60.37 | 8.91E-12 | 0.98 | 0.51 | 4.12  | 193  | 2.86 | 2.92 | 5.03 |
| 3901 | Non-pregnant | 55.08 | 8.54E-12 | 0.98 | 0.45 | 4.28  | 183  | 2.79 | 3.04 | 5.32 |
| 3971 | Non-pregnant | 57.04 | 8.95E-12 | 0.99 | 0.41 | 3.61  | 80   | 3.86 | 3.02 | 5.27 |
| 3726 | Non-pregnant | 57.97 | 8.65E-12 | 0.98 | 0.40 | 3.75  | 63   | 3.8  | 3.34 | 5.27 |
| 3678 | Non-pregnant | 59.65 | 8.6E-12  | 0.98 | 0.47 | 3.83  | 37   | 3.36 | 3.46 | 4.69 |
| 3667 | Non-pregnant | 59.30 | 8.71E-12 | 0.99 | 0.46 | 3.12  | 74   | 3.65 | 3.29 | 5.09 |
| 3696 | Non-pregnant | 57.83 | 8.52E-12 | 0.98 | 0.40 | 4.03  | 28   | 3.16 | 3.15 | 4.99 |

|      |              |       |          |      |      |      |     |      |      |      |
|------|--------------|-------|----------|------|------|------|-----|------|------|------|
| 3726 | Non-pregnant | 59.52 | 8.59E-12 | 0.98 | 0.50 | 4.01 | 63  | 3.05 | 3.23 | 5.15 |
| 3667 | Non-pregnant | 57.69 | 8.61E-12 | 0.98 | 0.45 | 3.02 | 74  | 3.57 | 3.59 | 5.04 |
| 3882 | Non-pregnant | 59.71 | 8.96E-12 | 0.98 | 0.47 | 3.32 | 296 | 3.03 | 3.3  | 5.19 |
| 3971 | Non-pregnant | 58.65 | 8.63E-12 | 0.98 | 0.47 | 3.52 | 94  | 3.54 | 3.22 | 4.37 |
| 3860 | Non-pregnant | 61.46 | 8.64E-12 | 0.98 | 0.47 | 2.87 | 74  | 2.59 | 3.18 | 5.62 |
| 3791 | Non-pregnant | 58.10 | 8.60E-12 | 0.97 | 0.45 | 3.8  | 42  | 3.92 | 3.31 | 5.23 |
| 3605 | Non-pregnant | 59.83 | 8.74E-12 | 0.99 | 0.47 | 3.15 | 27  | 3.18 | 3.29 | 5.16 |
| 3785 | Non-pregnant | 56.86 | 8.56E-12 | 0.98 | 0.43 | 4.21 | 38  | 3.79 | 3.34 | 5.13 |
| 3794 | Non-pregnant | 57.76 | 8.54E-12 | 0.98 | 0.43 | 3.1  | 40  | 4.02 | 3.06 | 5.07 |
| 3770 | Non-pregnant | 59.24 | 8.63E-12 | 0.98 | 0.42 | 3.52 | 40  | 3.88 | 3.57 | 5.08 |
| 3817 | Non-pregnant | 58.32 | 8.65E-12 | 0.98 | 0.42 | 2.97 | 40  | 3.17 | 3.1  | 5.23 |
| 3803 | Non-pregnant | 59.07 | 8.66E-12 | 0.99 | 0.53 | 3.7  | 145 | 4.03 | 3.01 | 4.84 |
| 3776 | Non-pregnant | 59.21 | 8.75E-12 | 0.99 | 0.49 | 4.1  | 74  | 3.43 | 3.27 | 5.17 |
| 3873 | Non-pregnant | 58.74 | 8.63E-12 | 0.99 | 0.50 | 3.44 | 345 | 3.37 | 2.26 | 5.7  |
| 3665 | Non-pregnant | 59.30 | 8.83E-12 | 1.00 | 0.39 | 4.25 | 165 | 3.74 | 3.34 | 4.75 |
| 3776 | Non-pregnant | 59.82 | 8.56E-12 | 0.98 | 0.45 | 3.68 | 74  | 3.51 | 3.08 | 5.01 |
| 3397 | Non-pregnant | 58.13 | 8.57E-12 | 0.99 | 0.49 | 2.85 | 87  | 4.13 | 3.31 | 5.08 |

|      |              |       |          |      |      |      |     |      |      |      |
|------|--------------|-------|----------|------|------|------|-----|------|------|------|
| 3671 | Non-pregnant | 59.03 | 8.75E-12 | 0.99 | 0.46 | 3.26 | 44  | 3.52 | 3.3  | 5.25 |
| 3968 | Non-pregnant | 56.49 | 8.59E-12 | 0.99 | 0.49 | 3.68 | 131 | 3.4  | 3.26 | 5.26 |
| 3774 | Non-pregnant | 56.37 | 8.68E-12 | 0.98 | 0.47 | 3.32 | 103 | 4.18 | 3.55 | 4.92 |
| 3840 | Non-pregnant | 57.84 | 8.57E-12 | 0.98 | 0.45 | 3.28 | 132 | 3.69 | 2.82 | 5.57 |
| 3624 | Non-pregnant | 58.26 | 8.65E-12 | 0.98 | 0.45 | 3.4  | 28  | 3.65 | 3.71 | 5.12 |
| 3870 | Non-pregnant | 58.54 | 8.61E-12 | 0.99 | 0.42 | 3.83 | 225 | 4.15 | 3.62 | 4.66 |
| 3870 | Non-pregnant | 55.18 | 8.99E-12 | 0.99 | 0.43 | 3.39 | 207 | 4.57 | 3.22 | 5.22 |
| 3701 | Non-pregnant | 59.21 | 8.63E-12 | 0.99 | 0.39 | 3.86 | 179 | 3.43 | 3.42 | 4.61 |
| 3701 | Non-pregnant | 59.42 | 8.37E-12 | 0.99 | 0.48 | 2.83 | 179 | 3.68 | 3.55 | 4.49 |
| 3701 | Non-pregnant | 55.66 | 8.93E-12 | 0.99 | 0.46 | 3.89 | 221 | 3.92 | 3.19 | 5.1  |
